# Supplementary material for: Tight Margins: Compression Garment Use during Exercise and Recovery—A Systematic Review
Source: MDPI journal article supplement (doi:10.3390/textiles2030022), 2022-07-21
Supplement: s1 [file s1]

Table S2: During Recovery Studies

|                                           | Study design   | Recovery outcome(s)                     | Sample size, sex; height; weight<br>(mean ± SD)   | Participant characteristics; training history                                              | Type of CGs; manufacturer; composition                                                                                           | Applied pressure (mmHg)                                                                                                        | Duration of recovery with CGs                             | Exercise modality  | Exercise protocol                                                                                                                | Effects of compression clothing<br><i>Compared to control group (non-compression clothing), unless otherwise stated</i>                                                                                                                                                                                                                                                                 |                                                                     |
|-------------------------------------------|----------------|-----------------------------------------|---------------------------------------------------|--------------------------------------------------------------------------------------------|----------------------------------------------------------------------------------------------------------------------------------|--------------------------------------------------------------------------------------------------------------------------------|-----------------------------------------------------------|--------------------|----------------------------------------------------------------------------------------------------------------------------------|-----------------------------------------------------------------------------------------------------------------------------------------------------------------------------------------------------------------------------------------------------------------------------------------------------------------------------------------------------------------------------------------|---------------------------------------------------------------------|
| <b>Armstrong et al., 2015 [117]</b>       | Double-blinded | Functional recovery                     | 23 M, 10 F; 38.5 ± 7.2 y; 174.4 ± 9.7 cm          | Moderately trained runners; 7.7 ± 7.6 y running experience; 6.2 ± 3.2 training hrs/wk      | Below-knee socks (BSN Medical Inc., Rutherford College, NC, USA; 58% polyester, 20% nylon, 10% cotton, 12% spandex) <sup>a</sup> | MR: 30–40 at ankle, 21–28 at calf                                                                                              | 48 hours                                                  | Running            | Competitive outdoor marathon (42.2 km)                                                                                           | TTE ( <i>treadmill</i> )<br>HR ( <i>max</i> )<br>RPE                                                                                                                                                                                                                                                                                                                                    | ↑*<br>↔<br>↔                                                        |
| <b>Atkins et al., 2020 [124]</b>          | Parallel group | Basketball performance                  | 30 M; 22.5 ± 4.1 y; 179.3 ± 4.0 cm; 71.7 ± 6.3 kg | Competitive basketball players; 6.2 ± 3.8 y experience; training time 9.6 ± 4.7 h per week | Full-length tights (Li-Ning, PowerShell AULM043-I, Beijing, China)                                                               | 7 ± 3 at ankle, 10 ± 3 at calf, 8 ± 2 at thigh (post-exercise); 8 ± 3 at ankle, 10 ± 2 at calf, 8 ± 2 at thigh (post-recovery) | 15 hours                                                  | Basketball         | 2 x 12 min trials of Basketball Exercise Simulation Test (2 mins rest b/n trials); plus 10 lunge jumps, 2 min isometric wall sit | Vertical jump height<br>Impulse<br>Repeated sprint time<br>5-0-5 agility time<br>20m sprint time<br>Sprint decrement<br>Sleep duration<br>Fatigue<br>Mm soreness<br>Perceived sleep quality                                                                                                                                                                                             | ↔<br>↔<br>↔<br>↔<br>↓S<br>↓S<br>↔<br>↓L*<br>↓L*<br>↑S               |
| <b>Broatch et al., 2019 [125]</b>         | Crossover      | Cardiovascular & neuromuscular function | 12 F; 25 ± 2 y; 78.9 ± 4.5 kg                     | Elite volleyball players, 5 ± 2 y competing internationally                                | Knee-high socks (2XU Compression Socks, Melbourne, Australia)                                                                    | 23 ± 11 at calf, 19–22 ± 8 at ankle (from prior research)                                                                      | ~ 9.5 hours (duration of Australia to Philippines flight) | Volleyball         | 1 x mod-high intensity volleyball session (2 hrs); 1 x low intensity skill-based session (1 hr) <sup>b</sup>                     | CMJ height & mean velocity (24 hrs)<br>CMJ relative power (48 hrs)<br>SO <sub>2</sub> (6.5 hrs, 9 hrs)<br>SBP (12 hrs)<br>HR (9 hrs)<br>Calf girth (right leg)<br>Bloods (tissue factor, tissue factor pathway inhibitor, thrombin-antithrombin complex, D-Dimer)<br>Fatigue (6.5 hrs)<br>Mm soreness (6.5 hrs)<br>Overall health (6.5 hrs)<br>Alertness (9 hrs)<br>Mm soreness (9 hrs) | ↑M<br>↑M<br>↑L<br>↓M<br>↓M<br>↓M<br>↔<br>↓L<br>↓M<br>↑S<br>↑M<br>↓L |
| <b>Brophy-Williams et al., 2017 [118]</b> | Crossover      | Endurance                               | 12 M; 30.5 ± 8.1 y; 181.4 ± 6.9 cm; 77.8 ± 6.5 kg | Well-trained runners; 5-km run time 19:29 ± 1:18 min:s; minimum 4 training runs/wk         | Socks (2XU Elite Compression Sock, Melbourne, Australia)                                                                         | 23 ± 11 at maximal calf girth, 22 ± 8 at upper ankle, 19 ± 8 at lower ankle                                                    | 60 minutes                                                | Running            | 5km treadmill TT                                                                                                                 | Decrement from TT1 to TT2<br>Calf X-sectional area<br>Blood [La-]<br>Mm soreness<br>Fatigue<br>Perceived recovery                                                                                                                                                                                                                                                                       | ↓M<br>↓L*<br>↔<br>↓M*<br>↓S<br>↑S                                   |
| <b>Brown et al., 2022 [121]</b>           | Parallel group | Strength                                | 45 M; 23 ± 4.3 y; 180 ± 8 cm; 91.9 ± 14.5 kg      | Recreational rugby players; minimum 2 years training experience                            | Waist-to-ankle tights (2XU, MA1551b men's; Melbourne, Australia); in “standard” and “custom-fitted” (CF) sizes <sup>c</sup>      | 32 ± 3 at ankle, 24 ± 4 at calf, 19 ± 3 at thigh (“standard”); 11 ± 5 at ankle, 10 ± 3 at calf, 7 ± 3                          | 48 hours                                                  | Sprinting, jumping | 20 x 20-m sprints with 5-m deceleration; 100 drop jumps from 0.6m platform                                                       | Strength recovery (48 hrs post, CF)<br>CMJ force (CF only)<br>Sprint time (post-ex, 48 hrs post, CF)<br>Sprint time (post-ex, 24, 48 hrs post, “standard”)<br>Midthigh girth (post-ex, 24, 48 hrs; CF)                                                                                                                                                                                  | ↑*<br>↑S<br>↑L<br>↑S-M<br>↑S-L                                      |

Table S2: During Recovery Studies

| Table 1. Summary of the effects of thigh compression on performance and recovery in elite athletes |                         |                               |                                                |                                                                                         |                                                                                                                         |                                                                                                |                                                                       |             |                                                                                                     |                                                          |                         |           |                                               |                                                                                                                                                             |                                                                                                                                   |                                                                   |            |         |                                                          |                                              |     |
|----------------------------------------------------------------------------------------------------|-------------------------|-------------------------------|------------------------------------------------|-----------------------------------------------------------------------------------------|-------------------------------------------------------------------------------------------------------------------------|------------------------------------------------------------------------------------------------|-----------------------------------------------------------------------|-------------|-----------------------------------------------------------------------------------------------------|----------------------------------------------------------|-------------------------|-----------|-----------------------------------------------|-------------------------------------------------------------------------------------------------------------------------------------------------------------|-----------------------------------------------------------------------------------------------------------------------------------|-------------------------------------------------------------------|------------|---------|----------------------------------------------------------|----------------------------------------------|-----|
| Study                                                                                              | Design                  | Intervention                  | Subjects                                       | Duration                                                                                | Stockings                                                                                                               | Thigh circumference                                                                            | Compression                                                           | Activity    | Effects                                                                                             |                                                          |                         |           |                                               |                                                                                                                                                             |                                                                                                                                   |                                                                   |            |         |                                                          |                                              |     |
|                                                                                                    |                         |                               |                                                |                                                                                         |                                                                                                                         |                                                                                                |                                                                       |             | Performance                                                                                         | Recovery                                                 |                         |           |                                               |                                                                                                                                                             |                                                                                                                                   |                                                                   |            |         |                                                          |                                              |     |
| Brown et al., 2021 [151]                                                                           | Single-blind, crossover | Functional recovery           | 5 M, 6 F; 22 ± 2 y; 79.1 ± 16.3 kg             | National level judoka                                                                   | Custom-fitted full-length stockings and arm sleeves (Isobar Compression, Manchester, UK) <sup>d</sup>                   | 18 ± 4.5 at thigh, 21 ± 5 at calf, 29 ± 3.5 at ankle, 20.5 ± 2.5 at wrist, 12.5 ± 2.5 at bicep | Approx. 12 hours (after training, overnight until next day's session) | Judo        | 3 x randori (sparring) sessions (~2 hrs each) over a three-day camp                                 | Midhigh girth (48 hrs, "standard" only)                  | ↓S                      |           |                                               |                                                                                                                                                             |                                                                                                                                   |                                                                   |            |         |                                                          |                                              |     |
|                                                                                                    |                         |                               |                                                |                                                                                         |                                                                                                                         |                                                                                                |                                                                       |             |                                                                                                     | CK (48 hrs, CF)                                          | ↓M*                     |           |                                               |                                                                                                                                                             |                                                                                                                                   |                                                                   |            |         |                                                          |                                              |     |
|                                                                                                    |                         |                               |                                                |                                                                                         |                                                                                                                         |                                                                                                |                                                                       |             |                                                                                                     | Mm soreness (post-ex, 24, 48 hrs; "standard")            | ↓S                      |           |                                               |                                                                                                                                                             |                                                                                                                                   |                                                                   |            |         |                                                          |                                              |     |
|                                                                                                    |                         |                               |                                                |                                                                                         |                                                                                                                         |                                                                                                |                                                                       |             |                                                                                                     | Mm soreness (post-ex, 24 hrs; CF)                        | ↑S                      |           |                                               |                                                                                                                                                             |                                                                                                                                   |                                                                   |            |         |                                                          |                                              |     |
|                                                                                                    |                         |                               |                                                |                                                                                         |                                                                                                                         |                                                                                                |                                                                       |             |                                                                                                     | Peak CMJ force (36 hrs)                                  | ↑S                      |           |                                               |                                                                                                                                                             |                                                                                                                                   |                                                                   |            |         |                                                          |                                              |     |
|                                                                                                    |                         |                               |                                                |                                                                                         |                                                                                                                         |                                                                                                |                                                                       |             |                                                                                                     | Grip strength (43 hrs)                                   | ↑S                      |           |                                               |                                                                                                                                                             |                                                                                                                                   |                                                                   |            |         |                                                          |                                              |     |
|                                                                                                    |                         |                               |                                                |                                                                                         |                                                                                                                         |                                                                                                |                                                                       |             |                                                                                                     | CK                                                       | ↓S                      |           |                                               |                                                                                                                                                             |                                                                                                                                   |                                                                   |            |         |                                                          |                                              |     |
|                                                                                                    |                         |                               |                                                |                                                                                         |                                                                                                                         |                                                                                                |                                                                       |             |                                                                                                     | Forearm circumference (12, 36 hrs)                       | ↓S                      |           |                                               |                                                                                                                                                             |                                                                                                                                   |                                                                   |            |         |                                                          |                                              |     |
|                                                                                                    |                         |                               |                                                |                                                                                         |                                                                                                                         |                                                                                                |                                                                       |             |                                                                                                     | Midhigh girth (43 hrs)                                   | ↓S                      |           |                                               |                                                                                                                                                             |                                                                                                                                   |                                                                   |            |         |                                                          |                                              |     |
|                                                                                                    |                         |                               |                                                |                                                                                         |                                                                                                                         |                                                                                                |                                                                       |             |                                                                                                     | Upper arm circumference (12-43 hrs)                      | ↓S-L                    |           |                                               |                                                                                                                                                             |                                                                                                                                   |                                                                   |            |         |                                                          |                                              |     |
| Carvalho et al., 2021 [153]                                                                        | Crossover               | Endurance, running kinematics | 10 M; 45 ± 9 y; 166 ± 4 cm; 69 ± 7 kg          | Experienced competitive runners; 14 ± 13 y experience; best 5km time 20:13 ± 3:54 min:s | Knee to foot stockings (10% polyamide, 75% polyester, 15% elastomer) in 3 types: regular, with camphor and with menthol | MR: 21-24 (anatomical location not reported)                                                   | 24 hours                                                              | Running     | 10km treadmill run @ competitive race pace (90% of personal best pace); average speed 3.5 ± 0.2 m/s | Skin temperature (mean, max; anterior & posterior thigh) | ↔                       |           |                                               |                                                                                                                                                             |                                                                                                                                   |                                                                   |            |         |                                                          |                                              |     |
|                                                                                                    |                         |                               |                                                |                                                                                         |                                                                                                                         |                                                                                                |                                                                       |             |                                                                                                     | HR (rest, max)                                           | ↔                       |           |                                               |                                                                                                                                                             |                                                                                                                                   |                                                                   |            |         |                                                          |                                              |     |
|                                                                                                    |                         |                               |                                                |                                                                                         |                                                                                                                         |                                                                                                |                                                                       |             |                                                                                                     | Overall comfort, perception of recovery (day 2)          | ↔                       |           |                                               |                                                                                                                                                             |                                                                                                                                   |                                                                   |            |         |                                                          |                                              |     |
|                                                                                                    |                         |                               |                                                |                                                                                         |                                                                                                                         |                                                                                                |                                                                       |             |                                                                                                     | Stride length                                            | ↔                       |           |                                               |                                                                                                                                                             |                                                                                                                                   |                                                                   |            |         |                                                          |                                              |     |
|                                                                                                    |                         |                               |                                                |                                                                                         |                                                                                                                         |                                                                                                |                                                                       |             |                                                                                                     | Stride rate                                              | ↔                       |           |                                               |                                                                                                                                                             |                                                                                                                                   |                                                                   |            |         |                                                          |                                              |     |
|                                                                                                    |                         |                               |                                                |                                                                                         |                                                                                                                         |                                                                                                |                                                                       |             |                                                                                                     | Angular kinematics (trunk, hip, knee, ankle)             | ↔                       |           |                                               |                                                                                                                                                             |                                                                                                                                   |                                                                   |            |         |                                                          |                                              |     |
|                                                                                                    |                         |                               |                                                |                                                                                         |                                                                                                                         |                                                                                                |                                                                       |             |                                                                                                     | Chatard et al., 2004 [11]                                | Crossover               | Endurance | 12 M; 63 ± 3 y; 169 ± 8 cm; 68 ± 9 kg         | Trained cyclists; average 5,108 km/year for past 10 ± 4 y; VO <sub>2</sub> max 49 ± 6 mL.kg <sup>-1</sup> .min <sup>-1</sup> ; max aerobic power 270 ± 31 W | Elastic stockings (micro-3 tights with grip-top, Ganzoni-Sigvaris, StJust-StRambert, France; 60% polyamide, 40% elastane (lycra)) | MR: 33 at ankle, 18 at calf, 13 at mid-thigh (converted from hPa) | 80 minutes | Cycling | 2 x 5 min maximal cycling (at max possible power output) | Decrement in max power                       | ↓*  |
|                                                                                                    |                         |                               |                                                |                                                                                         |                                                                                                                         |                                                                                                |                                                                       |             |                                                                                                     |                                                          |                         |           |                                               |                                                                                                                                                             |                                                                                                                                   |                                                                   |            |         |                                                          | HR                                           | ↔   |
|                                                                                                    |                         |                               |                                                |                                                                                         |                                                                                                                         |                                                                                                |                                                                       |             |                                                                                                     |                                                          |                         |           |                                               |                                                                                                                                                             |                                                                                                                                   |                                                                   |            |         |                                                          | Plasma volume                                | ↔   |
|                                                                                                    |                         |                               |                                                |                                                                                         |                                                                                                                         |                                                                                                |                                                                       |             |                                                                                                     |                                                          |                         |           |                                               |                                                                                                                                                             |                                                                                                                                   |                                                                   |            |         |                                                          | Blood [La-]                                  | ↔   |
| Hct                                                                                                | ↓*                      |                               |                                                |                                                                                         |                                                                                                                         |                                                                                                |                                                                       |             |                                                                                                     |                                                          |                         |           |                                               |                                                                                                                                                             |                                                                                                                                   |                                                                   |            |         |                                                          |                                              |     |
| RPE                                                                                                | ↔                       |                               |                                                |                                                                                         |                                                                                                                         |                                                                                                |                                                                       |             |                                                                                                     |                                                          |                         |           |                                               |                                                                                                                                                             |                                                                                                                                   |                                                                   |            |         |                                                          |                                              |     |
| Leg pain sensation                                                                                 | ↔                       |                               |                                                |                                                                                         |                                                                                                                         |                                                                                                |                                                                       |             |                                                                                                     |                                                          |                         |           |                                               |                                                                                                                                                             |                                                                                                                                   |                                                                   |            |         |                                                          |                                              |     |
| Davies, Thompson & Cooper, 2009 [146]                                                              | Crossover               | Team sport performance        | 4 M, 7 F; 23 ± 2.8 y; 180 ± 9 cm; 77.6 ± 11 kg | University level netball & basketball athletes                                          | Unspecified length tights (Linebreak)                                                                                   | MR: graduated pressure of ~15 from lower to upper legs                                         | 48 hours                                                              | Plyometrics | 5 x 20 drop jumps from a 0.6m platform, with maximal upward jump at end (2 mins rest b/n sets)      |                                                          |                         |           |                                               |                                                                                                                                                             |                                                                                                                                   |                                                                   |            |         |                                                          | CMJ                                          | ↔   |
|                                                                                                    |                         |                               |                                                |                                                                                         |                                                                                                                         |                                                                                                |                                                                       |             |                                                                                                     |                                                          |                         |           |                                               |                                                                                                                                                             |                                                                                                                                   |                                                                   |            |         |                                                          | 5-0-5 agility test                           | ↔   |
|                                                                                                    |                         |                               |                                                |                                                                                         |                                                                                                                         |                                                                                                |                                                                       |             |                                                                                                     |                                                          |                         |           |                                               |                                                                                                                                                             |                                                                                                                                   |                                                                   |            |         |                                                          | Sprint times (5, 10, 20m)                    | ↑L* |
|                                                                                                    |                         |                               |                                                |                                                                                         |                                                                                                                         |                                                                                                |                                                                       |             |                                                                                                     | CK (24, 48 hrs)                                          | ↔                       |           |                                               |                                                                                                                                                             |                                                                                                                                   |                                                                   |            |         |                                                          |                                              |     |
|                                                                                                    |                         |                               |                                                |                                                                                         |                                                                                                                         |                                                                                                |                                                                       |             |                                                                                                     | LDH (24, 48 hrs)                                         | ↔                       |           |                                               |                                                                                                                                                             |                                                                                                                                   |                                                                   |            |         |                                                          |                                              |     |
|                                                                                                    |                         |                               |                                                |                                                                                         |                                                                                                                         |                                                                                                |                                                                       |             |                                                                                                     | Midhigh girth (24, 48 hrs)                               | ↔                       |           |                                               |                                                                                                                                                             |                                                                                                                                   |                                                                   |            |         |                                                          |                                              |     |
|                                                                                                    |                         |                               |                                                |                                                                                         |                                                                                                                         |                                                                                                |                                                                       |             |                                                                                                     | CK (24 hrs, female subjects only)                        | ↓M*                     |           |                                               |                                                                                                                                                             |                                                                                                                                   |                                                                   |            |         |                                                          |                                              |     |
|                                                                                                    |                         |                               |                                                |                                                                                         |                                                                                                                         |                                                                                                |                                                                       |             |                                                                                                     | Mm soreness (48 hrs)                                     | ↓L*                     |           |                                               |                                                                                                                                                             |                                                                                                                                   |                                                                   |            |         |                                                          |                                              |     |
|                                                                                                    |                         |                               |                                                |                                                                                         |                                                                                                                         |                                                                                                |                                                                       |             |                                                                                                     | de Glanville & Hamlin, 2012 [119]                        | Single-blind, crossover | Endurance | 14 M; 33.8 ± 6.8 y; 180 ± 1 cm; 74.6 ± 4.4 kg | Trained multisport athletes; 6.5 ± 3.4 hrs training/wk                                                                                                      | Ankle-to-hip graduated tights (Skins, Sydney, Australia; 76% Meryl Elastane, 24% Lycra) <sup>e</sup>                              | 11.8 ± 2.5 at thigh, 14.7 ± 2.5 at calf, 6.0 ± 2.4 at ankle       | 24 hours   | Cycling | Simulated 40km race (cycle ergometer)                    | Performance time                             | ↑*  |
|                                                                                                    |                         |                               |                                                |                                                                                         |                                                                                                                         |                                                                                                |                                                                       |             |                                                                                                     |                                                          |                         |           |                                               |                                                                                                                                                             |                                                                                                                                   |                                                                   |            |         |                                                          | Average power output (total; per 10km stage) | ↑*  |
| HR (10km time point)                                                                               | ↑*                      |                               |                                                |                                                                                         |                                                                                                                         |                                                                                                |                                                                       |             |                                                                                                     |                                                          |                         |           |                                               |                                                                                                                                                             |                                                                                                                                   |                                                                   |            |         |                                                          |                                              |     |
| BP (end recovery)                                                                                  | ↓*                      |                               |                                                |                                                                                         |                                                                                                                         |                                                                                                |                                                                       |             |                                                                                                     |                                                          |                         |           |                                               |                                                                                                                                                             |                                                                                                                                   |                                                                   |            |         |                                                          |                                              |     |
| O <sub>2</sub> cost                                                                                | ↔                       |                               |                                                |                                                                                         |                                                                                                                         |                                                                                                |                                                                       |             |                                                                                                     |                                                          |                         |           |                                               |                                                                                                                                                             |                                                                                                                                   |                                                                   |            |         |                                                          |                                              |     |
| Blood [La-]                                                                                        | ↔                       |                               |                                                |                                                                                         |                                                                                                                         |                                                                                                |                                                                       |             |                                                                                                     |                                                          |                         |           |                                               |                                                                                                                                                             |                                                                                                                                   |                                                                   |            |         |                                                          |                                              |     |
| HR (all other time points)                                                                         | ↔                       |                               |                                                |                                                                                         |                                                                                                                         |                                                                                                |                                                                       |             |                                                                                                     |                                                          |                         |           |                                               |                                                                                                                                                             |                                                                                                                                   |                                                                   |            |         |                                                          |                                              |     |
| RPE                                                                                                | ↔                       |                               |                                                |                                                                                         |                                                                                                                         |                                                                                                |                                                                       |             |                                                                                                     |                                                          |                         |           |                                               |                                                                                                                                                             |                                                                                                                                   |                                                                   |            |         |                                                          |                                              |     |

**Table S2: During Recovery Studies**

|                                               |                |                     |                                                     |                                                                                                          |                                                                                                        |                                                                                  |                                                |                                           |                                                                                                                                                                                                                                                                          |                                                                                                                                                                                                                                                                                                           | ↔                                                              |
|-----------------------------------------------|----------------|---------------------|-----------------------------------------------------|----------------------------------------------------------------------------------------------------------|--------------------------------------------------------------------------------------------------------|----------------------------------------------------------------------------------|------------------------------------------------|-------------------------------------------|--------------------------------------------------------------------------------------------------------------------------------------------------------------------------------------------------------------------------------------------------------------------------|-----------------------------------------------------------------------------------------------------------------------------------------------------------------------------------------------------------------------------------------------------------------------------------------------------------|----------------------------------------------------------------|
| <b>Ferguson, Dodd &amp; Paley, 2014 [141]</b> | Crossover      | Functional recovery | 21 M; 21 ± 1 y; 179 ± 7 cm; 76 ± 9 kg               | Trained team sport athletes; predicted VO <sub>2</sub> max 54 ± 5 mL.kg <sup>-1</sup> .min <sup>-1</sup> | Graduated socks (2XU, Melbourne, Australia) <sup>f</sup>                                               | MR: 40 at ankle to 20 at calf                                                    | 12 hours                                       | Running                                   | Loughborough intermittent shuttle test: 2 x 45 mins continuous intermittent running (15 mins rest in b/n bouts)                                                                                                                                                          | Knee extensor strength loss (24 hrs post)<br>Knee flexor strength loss<br>CK<br>LDH<br>Plasma IL-6<br>CRP<br>Mm soreness (24 hrs)                                                                                                                                                                         | ↓*<br>↔<br>↔<br>↔<br>↔<br>↔<br>↓*                              |
| <b>French et al., 2008 [128]</b>              | Parallel group | Functional recovery | 26 M; 24.12 ± 3.2 y; 180.7 ± 7.5 cm; 80.4 ± 11.8 kg | Mixed level team sport athletes with >1 y resistance training experience                                 | Waist-to-ankle tights (Skins, Campbeltown, Australia; composite Lycra & Meryl microfiber) <sup>g</sup> | MR: 12 at calf, 10 at thigh                                                      | 12 hours                                       | Resistance exercise                       | 6 x 10 parallel back squats (Smith machine) @ 100% BW; 1 x 5s eccentric negative phase-only back squat (against a load relative to predicted 1RM)                                                                                                                        | CMJ<br>10m sprint time<br>30m sprint time<br>CK<br>Mb<br>Midthigh girth<br>Midcalf girth<br>Ankle dorsiflexion<br>Hip extension<br>Knee flexion<br>Hip flexion<br>Hip abduction<br>Mm soreness (1, 24, 48 hrs post)                                                                                       | ↔<br>↔<br>↑*<br>↔<br>↔<br>↔<br>↔<br>↔<br>↓*<br>↓*<br>↓*<br>↔   |
| <b>Goto &amp; Morishima, 2014 [133]</b>       | Crossover      | Mm strength         | 9 M; 21.0 ± 0.4 y; 172.7 ± 2.0 cm; 69.1 ± 2.4 kg    | Resistance-trained for >2 y prior                                                                        | Whole-body garment (Recharge; Under Armour, Baltimore, MD)                                             | NR                                                                               | 24 hrs                                         | Resistance exercise                       | 3-5 sets x 10 reps @ 70% 1RM, w 90s rest (chest press, lat pulldown, seated rowing, shoulder press, arm curl, and triceps press-down; bilateral leg press, bilateral knee extension, calf raise)                                                                         | 1RM chest press recovery speed (3, 5, 8 hrs post)<br>MVC recovery speed (unilateral knee extension)<br>Serum free testosterone<br>Blood [La-]<br>Serum Mb<br>Plasma IL-6<br>IL-1ra<br>Serum CK<br>Upper arm circumference<br>Thigh circumference<br>Mm soreness (24 hrs post)<br>Fatigue (24 hrs post)    | ↓*<br>↓*<br>↔<br>↔<br>↔<br>↔<br>↔<br>↔<br>↓*<br>↓*<br>↓*<br>↓* |
| <b>Goto, Mizuno &amp; Mori, 2017 [139]</b>    | Crossover      | Functional recovery | 11 M; 22.7 ± 0.9 y; 175.7 ± 6.7 cm; 73.6 ± 10.2 kg; | Recreationally active, resistance trained for >1 y                                                       | Whole-body garment (Recharge; Under Armour, Baltimore, MD)                                             | 8.6 ± 0.5 at thigh, 13.2 ± 1.4 at calf (from prior research; converted from hPa) | 4 hrs after session 1, ~18 hrs after session 2 | Cycling, resistance exercise, plyometrics | 10 × 6 s all-out cycling sprints @ 7.5% BW (30s rest); 3-5 sets x 10 reps (chest press, lat pulldown, shoulder press, bilateral leg press) @ 75% 1RM (2 mins rest b/n sets); 5 x 10 drop jumps from 0.4m platform (repeated twice in one day; 60 mins total per session) | Decrement in peak & mean power output (bench press, 5, 10 hrs post)<br>CMJ (height, contact time)<br>Rebound jump (height, contact time)<br>Repeated sprint test (power output)<br>Blood [La-]<br>Blood glucose<br>Serum Mb<br>CK<br>Plasma IL-6<br>Leptin<br>Mm soreness (24 hrs post, pectoralis major) | ↓*<br>↔<br>↔<br>↔<br>↔<br>↔<br>↔<br>↔<br>↔<br>↔<br>↓*          |

**Table S2: During Recovery Studies**

|                                    |                           |                                     |                                                         |                                                                                                                         |                                                                                                                                      |                                                                                |                                                               |                      |                                                                                                                                                                         | Mm soreness ( <i>hamstring, biceps brachii, triceps brachii, quadriceps femoris</i> )                                                                                                                             | ↔                                                    |
|------------------------------------|---------------------------|-------------------------------------|---------------------------------------------------------|-------------------------------------------------------------------------------------------------------------------------|--------------------------------------------------------------------------------------------------------------------------------------|--------------------------------------------------------------------------------|---------------------------------------------------------------|----------------------|-------------------------------------------------------------------------------------------------------------------------------------------------------------------------|-------------------------------------------------------------------------------------------------------------------------------------------------------------------------------------------------------------------|------------------------------------------------------|
|                                    |                           |                                     |                                                         |                                                                                                                         |                                                                                                                                      |                                                                                |                                                               |                      |                                                                                                                                                                         | Fatigue                                                                                                                                                                                                           | ↔                                                    |
| <b>Govus et al., 2018 [142]</b>    | Parallel group            | Neuromuscular & perceptual recovery | 18 M, 14 F; 21.2 ± 1.9 y; 176.7 ± 5.9 cm; 69.2 ± 6.8 kg | National level cross country skiers                                                                                     | Long sleeve shirt + waist-to-ankle tights (Craft Sportswear™, Borås, Sweden) <sup>h</sup>                                            | MR: 14.6 ± 0.1 at ankle, 13.7 ± 1.3 at calf, 5.3 ± 1.1 at mid-thigh            | ~17 hours                                                     | Cross-country skiing | 1570 m cross-country skiing competition (individual time-trial, followed by quarter-finals, semi-finals and finals) at 700m altitude                                    | CMJ<br>Urea<br>CK<br>Mm pain                                                                                                                                                                                      | ↔<br>↔<br>↔<br>↔                                     |
| <b>Hamlin et al., 2012 [122]</b>   | Single-blind, crossover   | Team sport performance              | 21 M; 20.1 ± 2.1 y; 182.1 ± 5.5 cm; 88.4 ± 8.8 kg       | Well-trained rugby union players; 3 years training experience; 3-4 physical conditioning sessions/wk                    | Ankle-to-hip graduated tights (Skins, Sydney, Australia; 76% Meryl Elastane, 24% Lycra) <sup>i</sup>                                 | 8.6 ± 2.6 at ankle, 13.4 ± 2.0 at mid-calf, 9.0 ± 2.2 at thigh                 | 24 hrs                                                        | Rugby circuit        | ~84 minutes of rugby-specific circuit test; sprinting, tackling, scrum drives, passing accuracy etc; 12 circuits of 14 stations (10 min break for 'halftime')           | Mean sprint time<br>3km time<br>Best sprint time<br>Speed decrement (%)<br>HR (3km TT, average)<br>HR (max)<br>Blood [La-] (3km TT)<br>Blood [La-] (end RS test)<br>CK (24 hrs post)<br>Mm soreness (48 hrs post) | ↓S<br>↓S<br>↔<br>↓M<br>↓S<br>↔<br>↔<br>↑S<br>↔<br>↓* |
| <b>Heiss et al., 2018 [143]</b>    | Within-subject, crossover | Mm damage                           | 8 M, 7 F; 25 ± 6 y; 179 ± 11 cm; 69 ± 12 kg             | Recreational sports players, >5 hrs training/wk                                                                         | Sock (Compression Sock Run & Walk, Bauerfeind AG, Zeulenroda-Triebes, Germany; 97% polyamide, 7% elastane) on one leg <sup>j</sup>   | MR: 18-21 ( <i>landmark unknown</i> )                                          | 60 hours                                                      | Eccentric exercise   | 5 x 30 eccentric heel raises with weighted vest (25% BW) (10 s rest b/n sets; last set to volitional fatigue)                                                           | T2-weighted TIRM signal intensity<br>Absolute T2 relaxation time<br>Intramuscular edema (GAS)<br>Passive ankle dorsiflexion<br>Calf circumference<br>CK<br>Mm soreness (resting, going downstairs)                | ↔<br>↔<br>↔<br>↔<br>↔<br>↔                           |
| <b>Hettchen et al., 2019 [134]</b> | Crossover                 | Mm strength                         | 19 M; 31.3 ± 7.7 y; 183.5 ± 8.6 cm; 81.1 ± 7.6 kg       | Handball players; >5 yrs experience in competitive ball sports; resistance-trained; 176 ± 64 mins exercise/wk           | Waist-to-ankle tights (Recovery Pro tights, Cep, Bayreuth, Germany; 75% polyamide, 25% spandex)                                      | MR: 18.1-23.4 at ankle; 16.3-23.5 at maximal calf girth; 9.9-13.9 at mid-thigh | 24 hrs + 12 hrs ( <i>separated by 12 hrs without tights</i> ) | Resistance exercise  | 2 x 8-10 reps (lunges, unilateral calf raises, squats) with dumbbells to failure (4 sec eccentric/1 sec isometric/explosive concentric; 60s rest b/n sets) <sup>k</sup> | Decrement in maximum hip/leg extension strength<br>Decrement in CMJ<br>CK (24, 48, 72, 96 hrs post)<br>Mb<br>Perceived Physical State<br>Pain sensation, ailments                                                 | ↓*<br>↓*<br>↓*<br>↔<br>↑*<br>↓*                      |
| <b>Hill et al., 2014 [144]</b>     | Parallel group            | Neuromuscular recovery              | 17 M, 7 F; 44.4 ± 10.7 y; 176.6 ± 8.6 cm; 72.5 ± 11 kg  | Trained runners; 38.1 ± 12.9 miles/week training; VO <sub>2</sub> max 54.7 ± 9.3 mL.kg <sup>-1</sup> .min <sup>-1</sup> | Waist-to-ankle tights (2XU, MA1551b men's compression tights, WA1552b women's compression tights, Melbourne, Australia) <sup>l</sup> | 9.9 ± 2 at thigh, 19.3 ± 2.6 at calf ( <i>anatomical position</i> )            | 72 hours                                                      | Running              | 26.2-mile (marathon) self-paced outdoor run                                                                                                                             | Finishing time<br>CK<br>CRP (24, 48, 72 hours post)<br>MVC (24, 48, 72 hours post)<br>Mm soreness (24 hrs post)                                                                                                   | ↔<br>↔<br>↔<br>↔<br>↓*                               |
| <b>Hill et al., 2017 [130]</b>     | Parallel group            | Neuromuscular recovery              | 26 M, 19 F; 30.1 ± 5.5                                  | Recreationally active                                                                                                   | Waist-to-ankle tights (2XU, MA1551b)                                                                                                 | 8.1 ± 1.3 at thigh, 14.8 ±                                                     | 72 hours                                                      | Plyometrics          | 5 x 20 drop jumps from a 0.6m                                                                                                                                           | Decrement in CMJ height ("High" vs "low")                                                                                                                                                                         | ↓*                                                   |

**Table S2: During Recovery Studies**

|                                                |                         |                         |                                                    |                                           |                                                                                                                                                                                                                              |                                                                             |           |                    |                                                                                              |                                                                                                                                                                                                                                                                                                                                                                                                                                                                                                                                |                                                                |
|------------------------------------------------|-------------------------|-------------------------|----------------------------------------------------|-------------------------------------------|------------------------------------------------------------------------------------------------------------------------------------------------------------------------------------------------------------------------------|-----------------------------------------------------------------------------|-----------|--------------------|----------------------------------------------------------------------------------------------|--------------------------------------------------------------------------------------------------------------------------------------------------------------------------------------------------------------------------------------------------------------------------------------------------------------------------------------------------------------------------------------------------------------------------------------------------------------------------------------------------------------------------------|----------------------------------------------------------------|
|                                                |                         |                         | y; 174.2 ± 9.5 cm; 72.2 ± 11.5 kg                  |                                           | men's compression tights and WA1552b women's compression tights, Melbourne, Australia; "Low" condition); full length stocking (Alleviant class II medical stockings, Jobskin, Nottingham, UK; "high" condition) <sup>m</sup> | 2.1 mm at calf ("low"); 14.8 ± 2.2 at thigh, 24.3 ± 3.7 mm at calf ("high") |           |                    | platform (10s b/n jumps, 2 mins b/n sets)                                                    | Decrement in CMJ height ( <i>both</i> )<br>Decrement in max voluntary contraction ( <i>hip/knee, 24-72 hrs post, "high"</i> )<br>Decrement in max voluntary contraction ( <i>24-48 hrs post, "low"</i> )<br>CK ( <i>post, 24, 72 hrs, "low"</i> )<br>CK ( <i>post, "high"</i> )<br>Mb ( <i>24, 72 hrs, both</i> )<br>CRP<br>Global soreness ( <i>48, 72 hrs, "low"</i> )<br>Global soreness ( <i>48, 72 hrs, "high"</i> )<br>Quadriceps soreness ( <i>48, 72 hrs, "high"</i> )                                                 | ↓S-L<br>↓L*<br>↓S<br>↓S<br>↓M<br>↓S-M<br>↔<br>↓S<br>↓S,M<br>↓S |
| <b>Hu et al., 2020 [155]</b>                   | Double-blind, crossover | Cardiovascular function | 10 M; 21.5 ± 1.4 y; 184 ± 4 cm; 81.7 ± 4.3 kg      | Novice runners; >5 miles/month running    | Waist-to-ankle graduated tights (Power Recovery Tight, 2XU® Pty. Ltd., Melbourne, Australia) <sup>n</sup>                                                                                                                    | MR: 26 at ankle to 8 at gluteus                                             | 4-5 hours | Running            | 2 week running program; daily runs of 2-5 miles                                              | Mean HRV ( <i>CGs vs sham</i> )<br>Mean HRV ( <i>CGs vs control</i> )<br>Daily fluctuation in HRV ( <i>CGs vs sham</i> )                                                                                                                                                                                                                                                                                                                                                                                                       | ↑*<br>↔<br>↓*                                                  |
| <b>Jakeman, Byrne &amp; Eston, 2010a [85]</b>  | Parallel group          | Functional recovery     | 17 F; 21.4 ± 1.7 y; 168 ± 4 cm; 66.9 ± 5.9 kg      | Physically active; 3 exercise sessions/wk | Waist-to-ankle tights (Skins, Sydney, Australia; 76% nylon tactel microfibre and 24% elastane)                                                                                                                               | 17.3 at calf and 14.9 at thigh ( <i>from prior research</i> )               | 12 hours  | Plyometrics        | 10 x 10 reps plyometric drop jumps from a 0.6-m box (10 s between jumps, 1 min between sets) | Decrement in squat jump height ( <i>24, 48, 72, 96 hrs post</i> )<br>Decrement in CMJ height ( <i>48 hrs post</i> )<br>Knee extensor strength loss ( <i>24, 48, 72, 96 hrs post</i> )<br>CK<br>Mm soreness ( <i>1, 24, 48, 72 hrs post</i> )                                                                                                                                                                                                                                                                                   | ↓*<br>↓*<br>↓*<br>↔<br>↓*                                      |
| <b>Jakeman, Byrne &amp; Eston, 2010b [131]</b> | Mixed model             | Functional recovery     | 32 F; 21.4 ± 1.7 y; 166 ± 4.7 cm; 66.7 ± 6.8 kg    | Physically active; 3 exercise sessions/wk | Waist-to-ankle tights (Skins, Sydney, Australia; 76% nylon tactel microfibre, 24% elastane) <sup>o</sup>                                                                                                                     | 17.3 at calf and 14.9 at thigh ( <i>from prior research</i> )               | 12 hours  | Plyometrics        | 10 x 10 reps plyometric drop jumps from a 0.6-m box (10 s between jumps, 1 min between sets) | Decrement in CMJ height ( <i>24, 48 hrs post, CG &amp; combined treatment</i> )<br>Decrement in CMJ height ( <i>72 hrs post, CG only</i> )<br>Decrement in squat jump height ( <i>24, 48, 72, 96 hrs post, CG &amp; combined treatment</i> )<br>Decrement in squat jump height ( <i>1 hr post, CG only</i> )<br>Knee extensor strength loss ( <i>24, 48, 72, 96 hrs post, CG &amp; combined treatment</i> )<br>Knee extensor strength loss ( <i>48 hrs post, CG only</i> )<br>CK<br>Mm soreness ( <i>24, 48, 72 hrs post</i> ) | ↓*<br>↓*<br>↓*<br>↓*<br>↓*<br>↓*<br>↔<br>↓*                    |
| <b>Kim, Kim &amp; Lee, 2017 [145]</b>          | Parallel group          | Neuromuscular recovery  | 16 M; 23.7 ± 2.5 y; 174.9 ± 6.8 cm; 75.0 ± 11.2 kg | Healthy, non-resistance trained           | Bicep-to-wrist arm sleeves (PRO Racing Arm Sleeve, Compressport International, S.A., Nyon, Switzerland)                                                                                                                      | MR: 5-10                                                                    | 24 hours  | Eccentric exercise | 2 x 25 reps elbow flexion on a modified preacher curl machine                                | Elbow flexor strength loss ( <i>24-96 hrs post</i> )<br>CK<br>Tumor necrosis factor-alpha<br>Mm soreness ( <i>24, 96 hrs post</i> )                                                                                                                                                                                                                                                                                                                                                                                            | ↓*<br>↔<br>↔<br>↓*                                             |

**Table S2: During Recovery Studies**

|                                            |                |                                  |                                                         |                                                                                                             |                                                                                                                                |                                                             |                   |                     |                                                                                                                                                               |                                                                                                                                                                                                                                                                                                                                                                            |                                                                         |
|--------------------------------------------|----------------|----------------------------------|---------------------------------------------------------|-------------------------------------------------------------------------------------------------------------|--------------------------------------------------------------------------------------------------------------------------------|-------------------------------------------------------------|-------------------|---------------------|---------------------------------------------------------------------------------------------------------------------------------------------------------------|----------------------------------------------------------------------------------------------------------------------------------------------------------------------------------------------------------------------------------------------------------------------------------------------------------------------------------------------------------------------------|-------------------------------------------------------------------------|
| <b>Kraemer et al., 2001a [12]</b>          | Parallel group | Neuromuscular recovery           | 20 W; 21.2 ± 3.1 y; 164.7 ± 4.8 cm; 61.3 ± 4.7 kg       | Recreationally active, non-strength trained                                                                 | Arm sleeve (Raschell fabric, 25% Lycra)                                                                                        | 10 ( <i>unspecified landmark</i> )                          | 24 hours x 5 days | Eccentric exercise  | 2 x 50 passive arm curls (dominant arm); maximal eccentric action every 4th rep (3 mins rest b/n sets)                                                        | Decrement in peak torque & power ( <i>day 3</i> )<br>Arm circumference ( <i>day 5</i> )<br>Resting elbow angle<br>Cortisol<br>LDH<br>CK ( <i>days 2-5</i> )<br>Mm soreness ( <i>days 2-4</i> )<br>Ease in performing daily activities ( <i>days 3-5</i> )                                                                                                                  | ↓*<br>↓*<br>↓*<br>↔<br>↔<br>↓*<br>↓*<br>↑*                              |
| <b>Kraemer et al., 2001b [13]</b>          | Parallel group | Neuromuscular recovery           | 15 M; 22.2 ± 3.1 y; 185.7 ± 3.3 cm; 85.8 ± 4.7 kgs      | Healthy, non-resistance trained                                                                             | Arm sleeve (Raschell fabric, 25% Lycra)                                                                                        | 10 ( <i>unspecified landmark</i> )                          | 24 hours x 3 days | Eccentric exercise  | 2 x 50 passive arm curls (dominant arm); maximal eccentric action every 4th rep (3 mins rest b/n sets)                                                        | Decrement in peak torque ( <i>48, 72 hrs post</i> )<br>Decrement in power ( <i>24, 48, 72 hrs post</i> )<br>Arm circumference ( <i>day 2</i> )<br>Elbow extension ( <i>days 2-3</i> )<br>CK ( <i>day 3</i> )<br>Arm soreness ( <i>day 3</i> )<br>Ease in performing daily activities ( <i>day 3</i> )<br>Pain ( <i>day 3</i> )                                             | ↓*<br>↓*<br>↓*<br>↓*<br>↓*<br>↑*<br>↓*                                  |
| <b>Kraemer et al., 2010 [127]</b>          | Crossover      | Functional recovery              | 11 M, 9 F; 23.1 ± 2.6 y; 170.1 ± 8.1 cm; 72.8 ± 7.6 kgs | Resistance-trained for >2 y prior                                                                           | Whole-body garment (Recharge; Under Armour, Baltimore, MD; 75% nylon and 25% spandex)                                          | NR                                                          | 24 hours          | Resistance exercise | 3 sets x 8 reps @ 8-10 RM zone (back squat, bench press, stationary lunge, bent over row, RDL, bicep curl, sit up, high pull from hang; 2 mins rest b/n sets) | CMJ peak & average power<br>CMJ performance decrement<br>Squat jump<br>Reaction time<br>Bench press throw power<br>Mm swelling ( <i>thigh</i> )<br>Limb circumference<br>Patella thickness<br>CK<br>Blood [La-]<br>Mm soreness ( <i>torso</i> )<br>Vitality<br>Fatigue<br>Sleep quality                                                                                    | ↔<br>↔<br>↔<br>↔<br>↑*<br>↓*<br>↔<br>↔<br>↓*<br>↓*<br>↑*<br>↓*<br>↔     |
| <b>Lee et al., 2021 [120]</b>              | Crossover      | Endurance                        | 13 M; 20.9 ± 1.4 y; 173.3 ± 4.8 cm; 65.9 ± 7.8 kg       | Physically active; >5 hrs exercise/wk; peak power output 254.2 ± 27.2 W                                     | Leg sleeves (UA 3568b, 2XU, Melbourne, Australia) worn on top of sport compression tights (MA1959b, 2XU, Melbourne, Australia) | 47.4 ± 8.8 at calf, 27.5 ± 5.0 at knee, 24.1 ± 2.4 at thigh | 60 mins           | Cycling             | 20 mins as 5 mins each @ 30%, 40%, 65% and 85% of peak power output                                                                                           | Cadence ( <i>5 min max test</i> )<br>Power output ( <i>5 min max test</i> )<br>Blood [La-] ( <i>5, 15 mins recovery</i> )<br>Stroke volume ( <i>15, 30, 45 mins</i> )<br>Cardiac output ( <i>5, 45 mins</i> )<br>HR ( <i>15, 30 mins</i> )<br>Mean arterial pressure<br>Systemic vascular resistance<br>RPE<br>Mm soreness ( <i>legs</i> )<br>Comfort<br>Pain<br>Tightness | ↑*<br>↑*<br>↓M*<br>↑*<br>↑*<br>↓*<br>↔<br>↔<br>↔<br>↓L*<br>↔<br>↔<br>↑* |
| <b>Martínez-Navarro et al., 2020 [138]</b> | Parallel group | Mm damage, inflammatory response | 19 M, 13 F; 41 ± 6 y; BMI 22.8 ± 2.0 kg/m <sup>2</sup>  | Recreational ultra-endurance athletes; 8 ± 3 y running experience, 70 ± 22 kms training/wk, VO <sub>2</sub> | Full body garment (unspecified) (Aitex, Textile Research Institute; 88% polyamide, 12% elastane)                               | MR: 10–15                                                   | 24 hours          | Trail running       | Competitive outdoor trail race (107.4km, elevation gain 5604m, elevation loss 4356m)                                                                          | Glomerular filtration rate ( <i>24 hrs post</i> )<br>CK ( <i>24 hrs post</i> )<br>Blood [La-] ( <i>24 hrs post</i> )<br>CRP<br>Cretinine                                                                                                                                                                                                                                   | ↓S<br>↓S<br>↓S<br>↔<br>↔                                                |

**Table S2: During Recovery Studies**

|                                                      |                |                         |                                                                                                                                                                                                   | max 54.1 ± 5.2<br>mL.kg <sup>-1</sup> .min <sup>-1</sup>    |                                                                                                                                                                                                 |                                                                                                      |                                            |                                    |                                                                                                                                                                                                                                                               | Mm soreness<br>(posterior leg, 24 hrs post)                                                                                                                                                                       | ↓L*                             |
|------------------------------------------------------|----------------|-------------------------|---------------------------------------------------------------------------------------------------------------------------------------------------------------------------------------------------|-------------------------------------------------------------|-------------------------------------------------------------------------------------------------------------------------------------------------------------------------------------------------|------------------------------------------------------------------------------------------------------|--------------------------------------------|------------------------------------|---------------------------------------------------------------------------------------------------------------------------------------------------------------------------------------------------------------------------------------------------------------|-------------------------------------------------------------------------------------------------------------------------------------------------------------------------------------------------------------------|---------------------------------|
| <b>McDonnell et al., 2019 [163]</b>                  | Parallel group | Mm pain                 | 12 M, 8 F; 25.6 ± 8.9 y; 175 ± 8 cm; 70.9 ± 10.9 kg (hike); 12 M, 6 F; 32.7 ± 16.8 y; 175 ± 8 cm; 74.9 ± 10.2 kg (trail run); 15 M, 6 F; 26.8 ± 5.3 y; 178 ± 8 cm; 75.4 ± 12.9 kg (calf exercise) | Regularly active (2-3 hrs/wk)                               | Knee-length graduated socks and knee-length uniform compression socks (Intersock; 94% polyamide, 6% elastane)                                                                                   | 21 ± 0.7 at ankle, 13.2 ± 1.9 at calf (graduated); 20.5 ± 2.2 at ankle, 21.0 ± 2.4 at calf (uniform) | 3 days (daytime only, not including sleep) | Hiking, running, strength exercise | HIKE: 10km simulated treadmill hike (5km uphill, 5km descent, 4-6 km/hr); TRAIL RUN: 14km mixed terrain outdoor run (250m elevation change; competitive/race pace); CALF EXERCISE: 6 x 10 reps @ 100% 3RM eccentric calf raises (standing calf raise machine) | Calf circumference<br>Ankle flexibility<br>Sit & reach test<br>MVC (calf: post-hike, post-trail run, post-calf exercise)<br>Calf pain (post-hike, day 2)<br>Calf pain (post-trail run, day 2, uniform socks only) | ↔<br>↔<br>↔<br>↔<br>↓*<br>↓*    |
| <b>Nguyen, Eager &amp; Nguyen, 2019(b) [88]</b>      | Crossover      | Cardiovascular function | 7 M, 7 F; 24.7 ± 4.5 y; 166.0 ± 7.6 cm; 60.9 ± 12.0 kg                                                                                                                                            | Healthy                                                     | Long sleeved shirt and waist-to-ankle tights (SportSkins Classic CGs; Skins, Campbelltown, New South Wales, Australia; 24% Roica Spandex, 76% Meryl Microfiber & nylon)                         | NR                                                                                                   | 2 hours                                    | Running                            | 10 min treadmill run as 2 mins @ 6 km/h, increasing by 1 km/h every 2 mins to a max 11 km/h                                                                                                                                                                   | HR (30 mins, 90-120 mins post)<br>Corrected QT interval (90-120 mins post)<br>ST interval (60, 90-120 mins post)                                                                                                  | ↓*<br>↓*<br>↑*                  |
| <b>da Silva Chiappa et al., 2021 [136]</b>           | Crossover      | Neuromuscular recovery  | 16 M; 26.08 ± 3.92 y; 175.7 ± 2.4 cm; 93.7 ± 10.6 kg                                                                                                                                              | Resistance-trained (min. 2 years)                           | Full-length arm sleeves (Microfiber-3, Model Second Skin, Brazil)                                                                                                                               | MR: 12-22 at biceps                                                                                  | 20 mins                                    | Resistance exercise                | 3 x 10 reps bench press, die bend, seated row, shoulder lift, barbell curl, triceps down @ 70% 1RM (90s b/n sets)                                                                                                                                             | Blood [La-] (5, 10, 15, 20 mins)<br>Blood [La-] (area under the curve)<br>RPE                                                                                                                                     | ↓*<br>↓*<br>↔                   |
| <b>Piras &amp; Gatta, 2017 [154]</b>                 | Crossover      | Cardiovascular function | 10 M; 21.60 ± 1.58 y; 179 ± 5 cm                                                                                                                                                                  | National-level swimmers; minimum 14 hrs training/wk         | Full body swimsuit (Powerskin Recovery Compression; Arena, Macerata, Italy; 65% polyamide, 34% elastane, 1% carbon fiber on the periphery; 58% polyamide and 42% elastane on central body part) | ~13 on forearms, ~10 on upper arms, ~6 on chest, ~15 on GAS, ~8 on mid-thigh, ~5 on mid-hip          | 90 minutes                                 | Swimming                           | Max 400m freestyle (as in competition)                                                                                                                                                                                                                        | Baroflex sensitivity, Cardiac output (20-30 mins post)<br>Blood pressure<br>HRV (40-50 mins post)<br>HR recovery (70 mins)<br>Total peripheral vascular resistance (50 mins)                                      | ↓*<br>↓*<br>↔<br>↓*<br>↓*<br>↓* |
| <b>Pruscino, Halson &amp; Hargreaves, 2013 [140]</b> | Crossover      | Functional recovery     | 8 M; 21.9 ± 2.3 y; 180.1 ± 8 cm; 77.9 ± 13.9 kg                                                                                                                                                   | Highly trained, national/international level hockey players | Waist-to-ankle graduated tights (2XU Compression, Australia)                                                                                                                                    | 19.1 ± 3.6 at ankle, 7.2 ± 2.8 at calf, 4.8 ± 1.6 at thigh                                           | 24 hours                                   | Running                            | Loughborough intermittent shuttle test: 5 x 15 mins continuous intermittent                                                                                                                                                                                   | 5-CMJ mean power (48 hrs post)<br>5-CMJ mean force<br>Squat jump peak force<br>Blood [La-]                                                                                                                        | ↓*<br>↔<br>↔<br>↔               |

**Table S2: During Recovery Studies**

|                                      |                           |                        |                                                    |                                                                             |                                                                                                                                                                                              |                                                                                                                                            |                      |                        |                                                                                                                                                          |                                                                                                                                                                                              |                                    |
|--------------------------------------|---------------------------|------------------------|----------------------------------------------------|-----------------------------------------------------------------------------|----------------------------------------------------------------------------------------------------------------------------------------------------------------------------------------------|--------------------------------------------------------------------------------------------------------------------------------------------|----------------------|------------------------|----------------------------------------------------------------------------------------------------------------------------------------------------------|----------------------------------------------------------------------------------------------------------------------------------------------------------------------------------------------|------------------------------------|
|                                      |                           |                        |                                                    |                                                                             |                                                                                                                                                                                              |                                                                                                                                            |                      |                        | running (3 mins rest in b/n bouts)<br>(Simulating duration of field hockey match)                                                                        | Tumour Necrosis Factor alpha<br>Interleukin 1 beta<br>Plasma IL-6<br>CK<br>CRP (baseline)<br>Perceived recovery (24 hrs post)<br>Mm soreness (average)                                       | ↔<br>↔<br>↔<br>↔<br>↑*<br>↑*<br>↓* |
| <b>Sahin et al., 2021 [137]</b>      | Crossover                 | Neuromuscular recovery | 10 M; 21.1 ± 1.2 y; 176 ± 5 cm, 69.3 ± 8.1 kg      | Healthy                                                                     | Stockings (Mediven 303 Dougmont Series CCL2; Medi GmbH, Bayreuth, Germany)                                                                                                                   | MR: 23-32 at thigh                                                                                                                         | 30 mins              | Resistance exercise    | 3 x 8-12 reps squats and deadlifts @ 80% 1 RM (90-120s between sets, 3 mins between exercises)                                                           | CK (24, 72 hrs post; active recovery conditions)<br>LDH<br>IL-6<br>TNF<br>Blood [La-] (30 mins post, active recovery conditions)                                                             | ↓*<br>↔<br>↔<br>↔<br>↓*            |
| <b>Shimokochi et al., 2017 [132]</b> | Crossover                 | Neuromuscular recovery | 17 M; 21.8 ± 1.8 y; 170.7 ± 5.8 cm; 68.3 ± 9.1 kg  | Physically active; at least 30 mins exercise 3 x per week                   | Upper and lower body garments (unspecified lengths) (RY-400, Skins International Trading AG, Steinhausen, Switzerland; 76% nylon, 24% polyurethane)                                          | NR                                                                                                                                         | ~8 hours (overnight) | Isokinetic dynamometry | 10 x 10 maximal isokinetic eccentric and concentric knee extensor contractions (@ 90°/s and 60°/s for concentric & eccentric respectively; 30s b/n sets) | MVIC (24 hrs post)<br>EMG (VAS, rectus femoris; 24 hrs post)                                                                                                                                 | ↑*<br>↔                            |
| <b>Sperlich et al., 2013 [183]</b>   | Within-subject, crossover | Mm blood flow          | 6 M; 22 ± 2 y; 181 ± 7 cm; 72 ± 4 kgs              | Healthy; VO <sub>2</sub> peak 54 ± 6 mL.kg <sup>-1</sup> .min <sup>-1</sup> | Hip-to-knee shorts (Sigvaris, Winterhur, Switzerland; 94% Polyamide and 6% Lycra), on one thigh only <sup>j</sup>                                                                            | 36.7 ± 4.1 average across thigh; 35 ± 3 at rectus femoris; 37 ± 4 at vastus lateralis; 36 ± 6 at vastus medialis; 39 ± 2 at biceps femoris | 100 mins (unclear)   | Cycling                | Ramp test to exhaustion (1 min passive recovery); then ~19 mins @ 75% peak O <sub>2</sub> uptake                                                         | Blood flow (biceps femoris)<br>Blood flow (quadriceps femoris)<br>Glucose uptake (biceps femoris, quadriceps femoris)                                                                        | ↔<br>↓*<br>↔                       |
| <b>Terbizan 2018 [185]</b>           | Parallel group            | Neuromuscular recovery | 30 M; 21.4 ± 2.3 y; 180.7 ± 0.8 cm; 79.5 ± 12.3 kg | Recreationally active; 3-5 days exercise/wk; non-plyometrics trained        | Two conditions: Waist-to-ankle tights (SKINS A400 Men's Active Long Tights) and knee-high stockings (SKINS Unisex Active Compression Socks; 89% polyamide, 9% elastane, and 2% copper fiber) | MR: 19-33 (not specific to garments used)                                                                                                  | 12 hours             | Plyometrics            | 10 x 10 box drops from 0.6m box (10s b/n jumps, 1 min b/n sets)                                                                                          | Vertical jump<br>Mm thickness (rectus femoris, lateral gastrocnemius)<br>Mm isokinetic strength (knee extensors, plantar flexors)<br>Perceived mm soreness (knee extensors, plantar flexors) | ↔<br>↔<br>↔<br>↔                   |
| <b>Trenell et al., 2006 [149]</b>    | Within-subject, crossover | Mm damage              | 11 M; 21.2 ± 3.1 y; 181 ± 6 cm;                    | Recreational athletes                                                       | Waist-to-ankle tights (Skins, Sydney, Australia; 76%                                                                                                                                         | 16 ± 2 at calf (17 ± 2 after                                                                                                               | 48 hours             | Walking                | 30 minutes downhill walking on treadmill (6                                                                                                              | Phosphomonoester                                                                                                                                                                             | ↔<br>↔                             |



**Table S2: During Recovery Studies**

|                                            |                |                     |                                                   |                                                                                                       |                                                                                                                 |                                                   |          |                                  |                                                                                                                   |                                                         |    |
|--------------------------------------------|----------------|---------------------|---------------------------------------------------|-------------------------------------------------------------------------------------------------------|-----------------------------------------------------------------------------------------------------------------|---------------------------------------------------|----------|----------------------------------|-------------------------------------------------------------------------------------------------------------------|---------------------------------------------------------|----|
|                                            |                |                     | 77.9 ± 9.1kg                                      |                                                                                                       | nylon tactel microfibre, 24% roica spandex) <sup>j</sup>                                                        | 48 hrs), 10 ± 2 at thigh                          |          |                                  | km/h @ 25% grade)                                                                                                 | Phosphocreatine/inorganic phosphate ( <i>blood pH</i> ) | ↔  |
|                                            |                |                     |                                                   |                                                                                                       |                                                                                                                 |                                                   |          |                                  |                                                                                                                   | Intracellular free magnesium                            | ↔  |
|                                            |                |                     |                                                   |                                                                                                       |                                                                                                                 |                                                   |          |                                  |                                                                                                                   | Phosphodiester ( <i>1 hr post</i> )                     |    |
|                                            |                |                     |                                                   |                                                                                                       |                                                                                                                 |                                                   |          |                                  |                                                                                                                   | Perceived mm soreness                                   |    |
| <b>Upton, Brown &amp; Hill, 2017 [123]</b> | Parallel group | Functional recovery | 19 M; 20.3 ± 1.7 y; 184.2 ± 7.5 cm, 89.5 ± 9.9 kg | Club-level rugby union players; 2 years competitive experience; min. 2 training sessions/wk + matches | Waist-to-ankle tights (2XU, MA1551B, Melbourne, Australia) <sup>p</sup>                                         | 14 ± 4.1 at calf, 8.5 ± 2.3 at front thigh        | 48 hours | Simulated rugby union match-play | 20 x 20-m sprints with 10-m deceleration; 10 including tackle bag 'slam' after sprinting (on 1 min rolling clock) | CMJ                                                     | ↔  |
|                                            |                |                     |                                                   |                                                                                                       |                                                                                                                 |                                                   |          |                                  |                                                                                                                   | MVIC ( <i>knee extension</i> )                          | ↔  |
|                                            |                |                     |                                                   |                                                                                                       |                                                                                                                 |                                                   |          |                                  |                                                                                                                   | CK                                                      | ↓* |
|                                            |                |                     |                                                   |                                                                                                       |                                                                                                                 |                                                   |          |                                  |                                                                                                                   | Perceived mm soreness ( <i>24, 48 hrs post</i> )        | ↓* |
| <b>Zinner et al., 2017 [126]</b>           | Crossover      | Functional recovery | 12 subjects; 22 ± 4 y; 187 ± 7 cm; 89.7 ± 12.7 kg | Well-trained handball players                                                                         | Hip-to-ankle tights (Sigvaris, Switzerland; 94% Polyamide and 6% Lycra) in “low” and “high” pressure conditions | 11 ± 1 at thigh (“low”); 23 ± 2 at thigh (“high”) | 48 hours | Sprinting, jumping               | 30 x 30m sprints; 2 x CMJs                                                                                        | 30m sprint                                              | ↔  |
|                                            |                |                     |                                                   |                                                                                                       |                                                                                                                 |                                                   |          |                                  |                                                                                                                   | CMJ performance decrement (“high”)                      | ↓^ |
|                                            |                |                     |                                                   |                                                                                                       |                                                                                                                 |                                                   |          |                                  |                                                                                                                   | CRP                                                     | ↔  |
|                                            |                |                     |                                                   |                                                                                                       |                                                                                                                 |                                                   |          |                                  |                                                                                                                   | CK ( <i>24, 48 hrs post, “low”</i> )                    | ↓^ |
|                                            |                |                     |                                                   |                                                                                                       |                                                                                                                 |                                                   |          |                                  |                                                                                                                   | Urea ( <i>24, 48 hrs post, “low”</i> )                  | ↑^ |
|                                            |                |                     |                                                   |                                                                                                       |                                                                                                                 |                                                   |          |                                  |                                                                                                                   | Urea ( <i>24 hrs post, “high”</i> )                     | ↑^ |
|                                            |                |                     |                                                   |                                                                                                       |                                                                                                                 |                                                   |          |                                  |                                                                                                                   | Overall recovery                                        | ↔  |
|                                            |                |                     |                                                   |                                                                                                       |                                                                                                                 |                                                   |          |                                  |                                                                                                                   | Mm stress                                               | ↔  |
|                                            |                |                     |                                                   |                                                                                                       |                                                                                                                 |                                                   |          |                                  |                                                                                                                   | Physical performance capability                         | ↔  |

<sup>^</sup> indicates ‘very likely positive’ change (as per Hopkins, 2002)

↔ no change, ↑ increase, ↓ decrease, ↓↑ mixed change, \* significant change ( $p < 0.05$ ), *S* small effect size (Cohen’s  $d$  0.20-0.50), *M* medium effect size (Cohen’s  $d$  0.50-0.80), *L* large effect size (Cohen’s  $d > 0.80$ ); *Blood [La-]* blood lactate, *BP* blood pressure, *BW* bodyweight, *CK* creatine kinase, *CMJ* countermovement jump, *CRP* C-reactive protein, *DBP* diastolic blood pressure, *EMG* electromyography, *GAS* medial gastrocnemius, *Hct* haematocrit, *HR* heart rate, *HRV* heart rate variability (natural logarithm of the root mean square of successive RR-interval differences), *IL-6* Interleukin-6, *IL-1ra* Interleukin-1 receptor antagonist, *LDH* lactate dehydrogenase, *Mb* myoglobin, *Mm* muscle, *MR* manufacturer reported, *MVC* maximal voluntary contraction, *NR* not reported, *PSIS* posterior superior iliac spine, *RM* repetition maximum, *RPE* rating of perceived exertion, *SBP* systolic blood pressure, *SO<sub>2</sub>* oxygen saturation, *TNF* tumour necrosis factor-alpha, *TT* time trial, *TTE* time to exhaustion, *VAS* vastus lateralis & medialis.

<sup>a</sup>Compared to placebo socks (minimally compressive knee-high diabetic socks; Knit-Rite Inc., Kansas City, KS, USA); <sup>b</sup>\*All participants also underwent 30 mins recovery after training (10 minutes hydrotherapy, 20 mins intermittent pneumatic compression therapy); <sup>c</sup>Compared to 5-minute sham ultrasound on each of the thighs, calves, and hamstrings; <sup>d</sup>Compared to placebo “recovery drink” (one spoonful of sucralose-based sweetener (2 g carbohydrate, 0.1 g protein) added to shakes in plain sight); <sup>e</sup>Compared to non-compressive tights; for the purpose of blinding, participants were informed that the study was to compare two types of compression garments; <sup>f</sup>Compared to 12 hrs using neuromuscular electrical stimulation device (Firstkind Limited, High Wycombe, UK) above posterior fold of knee joint; <sup>g</sup>Compared to contrast bathing intervention: 4 x cold (8-10°) and 3 x hot (37-40°) baths up to 50cm depth (60s in cold water, 180s in hot water); <sup>h</sup>Compared to 20 min standardised neuromuscular electrical stimulation protocol (rectus femoris, vastus medialis and vastus lateralis) by trained researchers; <sup>i</sup>Compared to non-compressive placebo garment (Ronhill Vizion Contour; RonHill, Cheshire, United Kingdom; 92% Polyamide [nylon], 8% Lycra); <sup>j</sup>Control was participant’s other leg; <sup>k</sup>Participants also received whole-body electrostimulation focused on gluteus, thigh and calf (85 hz, impulse width of 350  $\mu$ s) during resistance exercise; <sup>l</sup>Compared to 15 minutes (5 minutes of quadriceps, 5 minutes of hamstrings, and 5 minutes of gastrocnemius) of sham ultrasound applied within 1 hour of the completion of the marathon run; <sup>m</sup>Compared to 10 minutes (5 minutes each thigh) of sham ultrasound; <sup>n</sup>Compared to sham tights (same garment but two sizes larger) and control (3 week free-living baseline; ad libitum training); <sup>o</sup>Compared to passive recovery AND combined treatment group (30 minute professional massage on legs and then same compression tights for 12 hours); <sup>p</sup>Compared to sham ‘recovery drink’ (Robinsons no added sugar, fruit juice; 1 g carbohydrate and 0 g protein).
