# Supplementary material for: Tight Margins: Compression Garment Use during Exercise and Recovery—A Systematic Review
Source: MDPI journal article supplement (doi:10.3390/textiles2030022), 2022-07-21
Supplement: s1 [file s1]

**Table S3:** Combined Design (During Exercise & Recovery) Studies

|                                          | Study design | Performance & recovery outcome(s) | Sample size, sex; height; weight<br>(mean ± SD)     | Participant characteristics; training history                                                                          | Type of CGs; manufacturer; composition<br><br><i>Worn for performance and recovery, unless otherwise stated</i>                                                                                                                                                                    | Applied pressure (mmHg)                                                               | Duration of recovery with CGs                   | Exercise modality | Exercise protocol                                                                                              | Effects of compression clothing<br><br><i>Compared to control group (non-compression clothing), unless otherwise stated</i>                                                                                                                                                                                                                                                                                                                                                                                             |  |
|------------------------------------------|--------------|-----------------------------------|-----------------------------------------------------|------------------------------------------------------------------------------------------------------------------------|------------------------------------------------------------------------------------------------------------------------------------------------------------------------------------------------------------------------------------------------------------------------------------|---------------------------------------------------------------------------------------|-------------------------------------------------|-------------------|----------------------------------------------------------------------------------------------------------------|-------------------------------------------------------------------------------------------------------------------------------------------------------------------------------------------------------------------------------------------------------------------------------------------------------------------------------------------------------------------------------------------------------------------------------------------------------------------------------------------------------------------------|--|
| <b>Berry &amp; McMurray, 1987 [50]</b>   | Crossover    | Endurance                         | 6 M; 22 ± 4.9 y; 77.5 ± 9.2 kgs                     | Recreationally active college students; VO <sub>2</sub> max 56.4 ± 7.4 mL.kg <sup>-1</sup> .min <sup>-1</sup>          | Graduated compression stockings                                                                                                                                                                                                                                                    | MR: 18 at ankle, 8 at calf                                                            | 60 mins (Experiment I); 30 mins (Experiment II) | Running, cycling  | Incremental running treadmill test (Experiment I); 3 mins at 110% V02 max on bicycle ergometer (Experiment II) | VO <sub>2</sub> max ↔<br>TTE ↔<br>Recovery O <sub>2</sub> uptake ↔<br>Plasma volume ↔<br>Mean blood [La-] ( <i>Experiment I, 15 mins post; CGs worn during test &amp; recovery</i> ) ↓*<br>Mean blood [La-] ( <i>Experiment II, 30 mins post; CGs worn during test &amp; recovery</i> ) ↓*                                                                                                                                                                                                                              |  |
| <b>Book et al., 2016 [171]</b>           | Crossover    | Mm endurance, haemodynamics       | 7 M, 5 F; 27.3 ± 6.4 y; 73.0 ± 16.9 kgs             | Healthy volunteers                                                                                                     | Graduated compression socks (CEP Progressive + Run Socks)                                                                                                                                                                                                                          | Pressure difference from ankle to knee: 13.4 ± 3.9                                    | 5 minutes                                       | BW resistance     | 5 min plantar flexion exercise (20 exercises per minute, 3s per exercise)                                      | HR ↔<br>SBP ↔<br>DBP ↔<br>Cardiac output ↔<br>Blood flow velocity ↔<br>Mm oxygenation ↔<br>Mm perfusion pressure ↔<br>Mean arterial pressure ↔<br>Stroke volume ↔<br>Total peripheral resistance ↔<br>Deoxyhemoglobin ( <i>baseline</i> ) ↓*<br>Total blood volume ( <i>exercise</i> ) ↓*<br>Total Hb in leg ( <i>exercise</i> ) ↓*<br>Mm activity ↔                                                                                                                                                                    |  |
| <b>Bieuzen et al., 2014 [156]</b>        | Crossover    | Endurance                         | 11 M; 34.7 ± 9.8 y; 72.3 ± 6.8 kg                   | Highly trained runners; VO <sub>2</sub> max 60.1 ± 6.5 mL.kg <sup>-1</sup> .min <sup>-1</sup> ; training 60 ± 20 km/wk | <i>During exercise:</i> knee-to-ankle sleeve (Pulse Road, Sigvaris, Saint-Just-Saint-Rambert, France; 94% polyamide, 6% elasthane);<br><i>Recovery:</i> stockings (Sigvaris Recovery, Sigvaris, Saint-Just-Saint-Rambert, France; elasthane, polyamide, cotton, wool) <sup>a</sup> | MR; <i>Sleeve:</i> constant pressure of 25; <i>Stockings:</i> constant pressure of 20 | 48 hours                                        | Trail running     | Simulated trail race; 3 x 5.2km laps, mountainous terrain                                                      | Finishing time ↔<br>Running intensity (%HR max) ↔<br>CMJ ( <i>1, 24 hrs post</i> ) ↑L<br>CMJ ( <i>48 hrs post, sleeves</i> ) ↑L<br>CMJ ( <i>1, 24, 48 hrs post, stockings</i> ) ↑S-M<br>MVC ( <i>knee ext, 1 hr post, sleeves</i> ) ↓S<br>CK ( <i>1, 24 hrs post, stockings</i> ) ↑S-M<br>IL-6 ( <i>1 hr post, stockings</i> ) ↑↓S<br>CK, IL-6 ( <i>all other time points</i> ) ↔<br>RPE ( <i>final</i> ) ↔<br>Mm soreness ( <i>1, 24 hrs post; sleeves</i> ) ↓S<br>Mm soreness ( <i>1, 24 hrs post; stockings</i> ) ↓S |  |
| <b>Duffield &amp; Portus, 2007 [160]</b> | Crossover    | Team sport attributes             | 10 M; 22.1 ± 1.1 y; 185.2 ± 6.5 cm; 84.65 ± 5.90 kg | Club-level cricket players                                                                                             | Three full-body garments (Skins, Sydney, New South Wales, Australia; Under Armour [UA], Baltimore,                                                                                                                                                                                 | NR                                                                                    | 24 hrs                                          | Cricket           | 5 maximal cricket throws (20s recover); 6 accuracy throws; 30 min intermittent repeat sprint protocol          | Repeat sprint performance ( <i>10m, 20m time; total distance</i> ) ↔<br>HR ↔<br>Body mass ↔<br>Skin temp ( <i>all CGs</i> ) ↑L*<br>CK ( <i>24 hrs post, all CGs</i> ) ↓L<br>Blood [La-] ↔<br>pH, SO <sub>2</sub> , pO <sub>2</sub> ↔                                                                                                                                                                                                                                                                                    |  |

**Table S3: Combined Design (During Exercise & Recovery) Studies**

|                                                    |                           |                         |                                                          |                                                                                     |                                                                                                        |                                                |                           |                                  |                                                                                                                                                                    |                                                                                                                                                                                                                                                                                                                       |                                                                  |
|----------------------------------------------------|---------------------------|-------------------------|----------------------------------------------------------|-------------------------------------------------------------------------------------|--------------------------------------------------------------------------------------------------------|------------------------------------------------|---------------------------|----------------------------------|--------------------------------------------------------------------------------------------------------------------------------------------------------------------|-----------------------------------------------------------------------------------------------------------------------------------------------------------------------------------------------------------------------------------------------------------------------------------------------------------------------|------------------------------------------------------------------|
|                                                    |                           |                         |                                                          |                                                                                     | Maryland, USA;<br>Adidas,<br>Herzogenaurach,<br>Germany)                                               |                                                |                           |                                  |                                                                                                                                                                    | RPE                                                                                                                                                                                                                                                                                                                   | ↔                                                                |
|                                                    |                           |                         |                                                          |                                                                                     |                                                                                                        |                                                |                           |                                  |                                                                                                                                                                    | Mm soreness ( <i>arms, legs; all CGs</i> )                                                                                                                                                                                                                                                                            | ↔                                                                |
|                                                    |                           |                         |                                                          |                                                                                     |                                                                                                        |                                                |                           |                                  |                                                                                                                                                                    | Decline in maximal distance thrown ( <i>UA only</i> )                                                                                                                                                                                                                                                                 | ↓L*                                                              |
|                                                    |                           |                         |                                                          |                                                                                     |                                                                                                        |                                                |                           |                                  |                                                                                                                                                                    | Throw accuracy ( <i>10, 20 min; UA only</i> )                                                                                                                                                                                                                                                                         | ↓L                                                               |
|                                                    |                           |                         |                                                          |                                                                                     |                                                                                                        |                                                |                           |                                  |                                                                                                                                                                    |                                                                                                                                                                                                                                                                                                                       | ↑M                                                               |
| <b>Duffield et al., 2008 [158]</b>                 | Crossover                 | Team sport attributes   | 14 M; 19 ± 1 y; 86.5 ± 3.4 kg                            | Club standard, first division rugby players (training 2-3 days/wk plus game)        | Unspecified length (SKINS, Sydney, Australia)                                                          | NR                                             | 15 hrs following each day | Team sport                       | 4 x 15 mins simulated team sport, incl. 16 x 20m sprints and 6 maximal scrum efforts (80 mins total); consecutive days                                             | Sprint time ( <i>mean, total</i> )<br>Scrum peak power<br>HR<br>Body mass<br>Tympanic temp<br>Blood [La-] ( <i>immediately, 24, 48 hrs post</i> )<br>CK ( <i>immediately, 24, 48 hrs post</i> )<br>Skin temperature<br>Mm soreness ( <i>CGs for recovery, 48 hr post</i> )                                            | ↔<br>↔<br>↔<br>↔<br>↔<br>↔<br>↔<br>↔<br>↔*                       |
| <b>Duffield et al., 2010 [159]</b>                 | Crossover                 | Neuromuscular fatigue   | 11 subjects; 20.9 ± 2.7 y; 176.3 ± 5.8 cm; 75.4 ± 6.3 kg | Moderately trained, club/regional rugby players; 3-4 training sessions/wk plus game | Unspecified length (Bioslyx, Slazenger, Australia)                                                     | NR                                             | 24 hours                  | Sprinting, plyometrics           | 10 x 20m sprints (1 min cycle); 100 double leg bounds                                                                                                              | Mean sprint time<br>20m sprint time<br>Decline in bound distance<br>Knee extensor peak twitch force ( <i>post, 2 hrs post</i> )<br>Concentric force ( <i>decrement, recovery</i> )<br>HR<br>AST ( <i>24 hrs post</i> )<br>CK<br>CRP<br>RPE<br>Mm soreness ( <i>2 hrs post</i> )<br>Mm soreness ( <i>24 hrs post</i> ) | ↔<br>↔<br>↓M<br>↓*<br>↔<br>↔<br>↓M<br>↓S<br>↓S<br>↔<br>↓M<br>↓L* |
| <b>Hotfiel et al., 2021 [165]</b>                  | Within-subject, crossover | Neuromuscular recovery  | 10 M, 8 F; 24.1 ± 3.6 y                                  | Healthy, non-plyometrics trained                                                    | Below-knee sock (75% polyamide, 25% elastane) on one leg <sup>b</sup>                                  | MR: 21–22                                      | 6 hours                   | Plyometrics, eccentric exercises | 5 x 10 drop jumps from 0.25m box (5s between jumps, 1 min b/n sets); 5 x 50 eccentric heel raises on slanted block with weight vest @ 40% BW (last set to fatigue) | Jump height<br>Calf circumference<br>Calf range of motion<br>Intramuscular oedema ( <i>GAS</i> )<br>Mm soreness ( <i>6, 48 hrs post</i> )                                                                                                                                                                             | ↔<br>↔<br>↔<br>↔<br>↔                                            |
| <b>Leicht, Ahmadian &amp; Nakamura, 2020 [166]</b> | Crossover                 | Cardiovascular function | 15 M, 15 F; 19.8 ± 1.9 y; 175 ± 9 cm; 71.7 ± 12.4 kg     | Healthy, active                                                                     | Unspecified length (SKINST <sup>TM</sup> Sport, SKINS Compression Garments Pty Ltd, Sydney, Australia) | NR                                             | 10 mins                   | Cycling                          | 10 mins @ 70% age-predicted HR max                                                                                                                                 | HR<br>HRV<br>Blood [La-]<br>Cardiac autonomic activity/control<br>Long-term RR modulation<br>RPE                                                                                                                                                                                                                      | ↔<br>↔<br>↔<br>↔<br>↓*<br>↔                                      |
| <b>Marqués-Jiménez et al., 2018 [164]</b>          | Crossover                 | Functional recovery     | 18 M; 25.2 ± 3.0 y; 177.8 ± 5.6                          | Semi-professional soccer players; 3-4 training sessions + 1 match/wk                | Three conditions: stockings, tights & shorts (Compressport®,                                           | MR; 20–25 at ankle, 15–20 at calf (stockings); | 7 hrs x 3 days            | Football (soccer)                | 90 min friendly match (no further details)                                                                                                                         | LDH<br>CK ( <i>72 hrs post</i> )<br>Glutamic oxalacetic transaminase ( <i>72 hrs post</i> )                                                                                                                                                                                                                           | ↔<br>↓S<br>↓S                                                    |

**Table S3: Combined Design (During Exercise & Recovery) Studies**

|                                                   |                           |                                |                                                   |                                                                        |                                                                                                                                                                             |                                                                                                                   |                 |                                  |                                                                                                                                                                    |                                                                                                                                                                                                                                                                                                                                                                                             |
|---------------------------------------------------|---------------------------|--------------------------------|---------------------------------------------------|------------------------------------------------------------------------|-----------------------------------------------------------------------------------------------------------------------------------------------------------------------------|-------------------------------------------------------------------------------------------------------------------|-----------------|----------------------------------|--------------------------------------------------------------------------------------------------------------------------------------------------------------------|---------------------------------------------------------------------------------------------------------------------------------------------------------------------------------------------------------------------------------------------------------------------------------------------------------------------------------------------------------------------------------------------|
|                                                   |                           |                                | cm; 76.9 ± 6.5 kg                                 |                                                                        | Genève, Switzerland)                                                                                                                                                        | 25–30 at calf, 15–20 at thigh (tights); 15–20 at thigh (shorts)                                                   |                 |                                  |                                                                                                                                                                    | Glutamic-pyruvic transaminase ↓L<br>Gamma glutamyl transpeptidase ↓M<br>Thigh swelling (half time, 48 hrs post) ↓S<br>Thigh swelling (24 hrs post) ↓L<br>Calf swelling (half time, 24, 48, 72 hrs post) ↓L<br>Hamstring soreness (72 hrs post) ↓L<br>Calf, quadriceps soreness (24 hrs post) ↓S<br>Quadriceps soreness (48, 72 hrs post) ↓L<br>Tibialis soreness (24, 72 hrs post) ↓M<br>↓S |
| <b>Ménétrier et al., 2011 [157]</b>               | Crossover                 | Endurance                      | 14 M; 21.9 ± 0.7 y; 177.6 ± 1.9 cm; 67.2 ± 2.4 kg | Moderately endurance trained (3.13 ± 0.3 h per week)                   | Calf sleeves (Compressport, Geneva, Switzerland, 72 % nylon, 28 % elastane)                                                                                                 | MR: 5 at the medial ankle, 27 at the top of gastrocnemius                                                         | 15 min + 30 min | Running                          | 30 min treadmill run @ 60% max aerobic velocity (12% slope) [15 mins recovery]; TTE @ 100 % max aerobic velocity (12% slope) [30 min recovery period]              | TTE ↔<br>SO <sub>2</sub> (calf; rest, during post-TTE recovery) ↑*<br>HR ↔<br>RPE ↔                                                                                                                                                                                                                                                                                                         |
| <b>Rimaud et al., 2010 [80]</b>                   | Crossover                 | Endurance; functional recovery | 8 M; 27.1 ± 0.9 y; 177 ± 2.9 cm; 72.90 ± 3.0 kg   | Recreationally endurance trained; 5.4 ± 1.1 hrs training/wk            | Knee-length stockings (Gibaud, Saint-Etienne, France)                                                                                                                       | MR: 22 at calf, 12 at ankle                                                                                       | 60 mins         | Cycling                          | Incremental test to exhaustion (2 min stages increasing by 30W each stage)                                                                                         | VO <sub>2</sub> ↔<br>VO <sub>2</sub> max power ↔<br>HR ↔<br>SBP, DBP ↔<br>Blood [La-] (post-exercise) ↑*<br>Predicted net lactate release rate (2-4 mins recovery) ↑*                                                                                                                                                                                                                       |
| <b>Riexinger et al., 2021 [182]</b>               | Within-subject, crossover | Mm damage                      | 9 M, 7 F; 24.1 [18-29] y                          | Healthy                                                                | Below-knee sock (75% polyamide, 25% elastane) on one leg <sup>b</sup>                                                                                                       | MR: 21–22                                                                                                         | 6 hours         | Plyometrics, eccentric exercises | 5 x 10 drop jumps from 0.25m box (5s between jumps, 1 min b/n sets); 5 x 50 eccentric heel raises on slanted block with weight vest @ 40% BW (last set to fatigue) | Total mm perfusion ↔<br>Perfusion fraction ↔<br>Tissue diffusivity (tibialis anterior, GAS; post, 30 mins, 6, 48 hrs post) ↔                                                                                                                                                                                                                                                                |
| <b>Struhár, Kumstát &amp; Králová, 2018 [161]</b> | Double-blind, crossover   | Mm function                    | 10 M; 24.8 ± 3.45 y; 181 ± 8 cm; 74.11 ± 8.63 kg  | Well-trained runners; 43.0 ± 5.4 km/wk; VO2 max 62.89 ± 7.68 ml/kg/min | Three types of below-knee socks: “low” graduated (88% nylon, 12% elastane Lycra); “medium” graduated (82% nylon, 18% elastane Lycra); “high” reverse grade compression (75% | 18 at ankle, 15 at below knee (low); 25 at ankle, 21 at below knee (medium); 18 at ankle, 24 at below knee (high) | 4 hours         | Running                          | 8 km treadmill run @ 75% VO <sub>2</sub> max (6% grade)                                                                                                            | Running time ↔<br>Strength loss (plantar flexion 60°-s-1, dorsal flexion 60°-s-1, 24, 48 hrs post) ↔<br>Strength loss (plantar flexion 120°-s-1; 24, 48 hrs post) ↓*<br>Peak pressure tolerance (GAS; 24, 48 hrs post, “low” only) ↑*<br>CK (24, 48 hrs post; “medium” and “high”) ↓*<br>RPE ↔                                                                                              |

Table S3: Combined Design (During Exercise & Recovery) Studies

|                             |                                      |                     |                                            |                                                                                               |                                            |  |           |         |                                                                                                                                   |                                     |    |
|-----------------------------|--------------------------------------|---------------------|--------------------------------------------|-----------------------------------------------------------------------------------------------|--------------------------------------------|--|-----------|---------|-----------------------------------------------------------------------------------------------------------------------------------|-------------------------------------|----|
| Williams et al., 2021 [162] | Single-blind, crossover <sup>d</sup> | Functional recovery | 10 M; age 21 ± 2 y; 178 ± 5 cm; 71 ± 11 kg | University-level cyclists; VO <sub>2</sub> max 55 ± 10 mL.kg <sup>-1</sup> .min <sup>-1</sup> | polyamide, 25% elastane Lycra <sup>c</sup> |  | ~24 hours | Cycling | Day 1: ~22 mins mod-high intensity (70-90% of gas exchange threshold) and 60s max sprint; Day 2: 8 km max time trial <sup>c</sup> | TT (both)                           | ↓* |
|                             |                                      |                     |                                            |                                                                                               |                                            |  |           |         |                                                                                                                                   | Average work rate (both)            | ↑* |
|                             |                                      |                     |                                            |                                                                                               |                                            |  |           |         |                                                                                                                                   | Blood glucose                       | ↔  |
|                             |                                      |                     |                                            |                                                                                               |                                            |  |           |         |                                                                                                                                   | Mb                                  | ↔  |
|                             |                                      |                     |                                            |                                                                                               |                                            |  |           |         |                                                                                                                                   | Plasma lactate                      | ↓* |
|                             |                                      |                     |                                            |                                                                                               |                                            |  |           |         |                                                                                                                                   | (0, 30, 60 mins post Day 1; "high") | ↓* |
|                             |                                      |                     |                                            |                                                                                               |                                            |  |           |         |                                                                                                                                   | HR (average, peak)                  | ↔  |
|                             |                                      |                     |                                            |                                                                                               |                                            |  |           |         |                                                                                                                                   | Resting SBP                         | ↔  |
|                             |                                      |                     |                                            |                                                                                               |                                            |  |           |         |                                                                                                                                   | Resting DBP                         | ↓* |
|                             |                                      |                     |                                            |                                                                                               |                                            |  |           |         |                                                                                                                                   | Mean arterial pressure              | ↓* |
|                             |                                      |                     |                                            |                                                                                               |                                            |  |           |         |                                                                                                                                   | (24 hrs post; "high")               | ↓* |
|                             |                                      |                     |                                            |                                                                                               |                                            |  |           |         |                                                                                                                                   | Perceived mm soreness               | ↔  |
|                             |                                      |                     |                                            |                                                                                               |                                            |  |           |         |                                                                                                                                   | Sleep quality                       | ↔  |
|                             |                                      |                     |                                            |                                                                                               |                                            |  |           |         |                                                                                                                                   | Fatigue                             | ↔  |
|                             |                                      |                     |                                            |                                                                                               |                                            |  |           |         |                                                                                                                                   | Discomfort                          | ↔  |

↔ no change, ↑ increase, ↓ decrease, ↓↑ mixed change, \* significant change ( $p < 0.05$ ), *S* small effect size (Cohen's  $d$  0.20-0.50), *M* medium effect size (Cohen's  $d$  0.50-0.80), *L* large effect size (Cohen's  $d > 0.80$ ); *AST* aspartate transaminase, *Blood [La-]* blood lactate, *BW* bodyweight, *CK* creatine kinase, *CMJ* countermovement jump, *CRP* C-reactive protein, *DBP* diastolic blood pressure, *GAS* medial gastrocnemius, *HB* haemoglobin, *HR* heart rate, *HRV* heart rate variability (natural logarithm of the root mean square of successive RR-interval differences), *IL-6* Interleukin-6, *Mb* myoglobin, *Mm* muscle, *MR* manufacturer reported, *MVC* maximal voluntary contraction, *NR* not reported, *RM* repetition maximum, *RPE* rating of perceived exertion, *SBP* systolic blood pressure, *SO<sub>2</sub>* oxygen saturation, *TTE* time to exhaustion

<sup>a</sup>There was no condition where compression was worn during exercise *and* recovery from exercise; <sup>b</sup>Control was participant's other leg; <sup>c</sup>Each pair of socks was designed in the same appearance and colour for the purpose of blinding; <sup>d</sup>Blinding only described as 'The participants were naive to the specific experimental hypotheses'; <sup>e</sup>Compression tights worn during 8km max time trial only.
