# Supplementary material for: Tight Margins: Compression Garment Use during Exercise and Recovery—A Systematic Review
Source: MDPI journal article supplement (doi:10.3390/textiles2030022), 2022-07-21
Supplement: s1 [file s1]

**Table S1:** During Exercise Studies

| Citation                        | Study design             | Performance outcome(s) | Sample size, sex; height; weight<br>(mean ± SD)    | Participant characteristics; training history                                                          | Type of CGs; manufacturer; composition                                                                                  | Applied pressure<br>(mmHg)                                                                                | Exercise modality | Exercise protocol                                             | Effects of compression clothing<br><br><i>Compared to control group (non-compression clothing), unless otherwise stated</i>                                                                                                                                                                                                |
|---------------------------------|--------------------------|------------------------|----------------------------------------------------|--------------------------------------------------------------------------------------------------------|-------------------------------------------------------------------------------------------------------------------------|-----------------------------------------------------------------------------------------------------------|-------------------|---------------------------------------------------------------|----------------------------------------------------------------------------------------------------------------------------------------------------------------------------------------------------------------------------------------------------------------------------------------------------------------------------|
| Ali, Caine & Snow, 2007(a) [25] | Crossover                | Endurance              | 14 M; 22 ± 0.4 y; 174 ± 1 cm, 72 ± 2.0 kg          | Recreational runners; VO <sub>2</sub> max 56.1 ± 0.4 mL.kg <sup>-1</sup> .min <sup>-1</sup>            | Knee-length graduated stockings (Venosan, 4001, St. Galen, Switzerland)                                                 | MR: 18 – 22                                                                                               | Running           | 2 x multi-stage fitness shuttle running tests w 1 hr recovery | Distance run ↔<br>HR ↔<br>Perceived soreness ↔<br>RPE ↔<br>Comfort, tightness & pain ratings ↔                                                                                                                                                                                                                             |
| Ali, Caine & Snow, 2007(b) [25] | Crossover                | Endurance              | 14 M; 23 ± 0.5 y; 176 ± 1 cm; 74.2 ± 2.1 kg        | Recreational runners; VO <sub>2</sub> max 55.0 ± 0.9 mL.kg <sup>-1</sup> .min <sup>-1</sup>            | Knee-length graduated stockings (Venosan, 4001, St. Galen, Switzerland)                                                 | MR: 18 – 22                                                                                               | Running           | 10km road run at predetermined 'fast' pace                    | Run time ↔<br>HR ↔<br>RPE ↔<br>Comfort, tightness & pain ratings ↔<br>Muscle soreness (24 hrs post) ↓*                                                                                                                                                                                                                     |
| Ali, Creasy & Edge, 2010 [83]   | Double blind             | Endurance              | 9 M, 1 F; 36 ± 10 y; 180 ± 8 cm, 72.9 ± 13.2 kgs   | Competitive runners/triathletes, VO <sub>2</sub> max 70.4 ± 6.1 mL.kg <sup>-1</sup> .min <sup>-1</sup> | Knee-length graduated stockings (Julius Zorn GmbH, Aichach, Germany) <sup>a</sup>                                       | 11 ± 2 at ankle, 8 ± 1 at calf ('low'); 26 ± 3 at ankle, 15 ± 2 at calf ('high')                          | Running           | 40 min treadmill run at 80 ± 5% maximal oxygen uptake         | CMJ height & power ↔<br>VO <sub>2</sub> ↔<br>HR ↔<br>Blood [La-] ↔<br>CK ↔<br>Mb ↔<br>Muscle soreness ↔<br>Pressure sensitivity ('High' CGs only) ↓*<br>RPE ↔<br>Pleasure/displeasure rating ↔<br>Arousal/activation rating ↔<br>Perceived comfort ('High' CGs only) ↓*<br>Perceived pain & tightness ('High' CGs only) ↑* |
| Ali, Creasy & Edge, 2011 [27]   | Double blind; crossover  | Endurance              | 9 M, 3 F; 33 ± 10 y; 174 ± 6 cm, 68.5 ± 6.2 kg     | Competitive runners, VO <sub>2</sub> max 68.7 ± 5.8 mL.kg <sup>-1</sup> .min <sup>-1</sup>             | Knee-length graduated stockings (Julius Zorn GmbH, Aichach, Germany) <sup>a</sup>                                       | MR: 15 at ankle, 12 at knee ('low'); 21 at ankle, 18 at knee ('medium'); 32 at ankle, 23 at knee ('high') | Running           | 10 km outdoor time trial on synthetic track                   | Running time ↔<br>CMJ jump height ('Low' & 'medium' CGs) ↑*<br>HR ↔<br>Blood [La-] ↔<br>RPE ↔<br>Pleasure/displeasure ↔<br>Perceived activation ↔<br>Comfort ↓* ('Medium' & 'high' CGs)<br>Tightness ('High' CGs) ↑*<br>Pain ('High' CGs) ↑*                                                                               |
| Areces et al., 2015 [21]        | Case-control, ecological | Endurance              | 15 M, 2 F; 42.7 ± 7.8 y; 173 ± 9 cm, 69.9 ± 7.7 kg | Experienced marathon runners, 11.1 ± 3.6 training y, 58 ± 20 kms/wk                                    | Knee-length graduated stockings (NRG Energy; Medilast Sport, Lleida, Spain; 77% polyamide, 13% elastane, 10% polyester) | MR: 25 to 20                                                                                              | Running           | Competitive outdoor marathon                                  | Running time ↔<br>Running pace ↔<br>CMJ jump height, power production ↔<br>Body mass ↔<br>Blood O <sub>2</sub> saturation & osmolality ↔<br>Sodium, chloride, potassium & calcium concentration ↔<br>Mb, CK, LDH ↔<br>Lower leg volume ↔<br>RPE ↔                                                                          |

**Table S1: During Exercise Studies**

|                                                    |              |                                             |                                                                                            |                                                                                                            |                                                                                                                          |                                                                                |                                    |                                                                                                                  |                                                                        |    |
|----------------------------------------------------|--------------|---------------------------------------------|--------------------------------------------------------------------------------------------|------------------------------------------------------------------------------------------------------------|--------------------------------------------------------------------------------------------------------------------------|--------------------------------------------------------------------------------|------------------------------------|------------------------------------------------------------------------------------------------------------------|------------------------------------------------------------------------|----|
|                                                    |              |                                             |                                                                                            |                                                                                                            |                                                                                                                          |                                                                                |                                    |                                                                                                                  | Lower limb soreness post-race                                          | ↔  |
|                                                    |              |                                             |                                                                                            |                                                                                                            |                                                                                                                          |                                                                                |                                    |                                                                                                                  | Lower limb soreness (24 hrs post)                                      | ↓* |
|                                                    |              |                                             |                                                                                            |                                                                                                            |                                                                                                                          |                                                                                |                                    |                                                                                                                  | Lower limb soreness (48 hrs post)                                      | ↔  |
| <b>Bajelani, Arshi &amp; Akhavan, 2022 [104]</b>   | Crossover    | Running biomechanics                        | 15 M; 29 ± 1.1 y; 170 ± 1.5 cm; 70 ± 9.6 kg                                                | Experienced track runners; 22:10 ± 1:30 (5 km), 49:20 ± 2:40 (10 km) average record                        | Shorts (custom sized, no further details)                                                                                | MR: 12-14 on legs                                                              | Running                            | 10 minute treadmill run at 11 km/h                                                                               | Complexity of behaviour                                                | ↓* |
|                                                    |              |                                             |                                                                                            |                                                                                                            |                                                                                                                          |                                                                                |                                    |                                                                                                                  | Permutation entropy                                                    | ↓* |
| <b>Ballmann, Hotchkiss &amp; Rogers, 2019 [38]</b> | Crossover    | Anaerobic power                             | 12 M; 20.3 ± 1.37 y; 195 ± 9 cm; 88.8 ± 11.4 kg                                            | Collegiate male basketball players                                                                         | Waist-to-ankle tights (Nike, Beaverton, OR, USA; 80% nylon and 20% spandex)                                              | MR: 15–20 at ankle, 6–10 at thigh                                              | Cycling                            | 2 x 30s repeated Wingate anaerobic tests                                                                         | Average mean power                                                     | ↑* |
|                                                    |              |                                             |                                                                                            |                                                                                                            |                                                                                                                          |                                                                                |                                    |                                                                                                                  | Average anaerobic capacity                                             | ↑* |
|                                                    |              |                                             |                                                                                            |                                                                                                            |                                                                                                                          |                                                                                |                                    |                                                                                                                  | Peak power                                                             | ↔  |
|                                                    |              |                                             |                                                                                            |                                                                                                            |                                                                                                                          |                                                                                |                                    |                                                                                                                  | Average anaerobic power                                                | ↔  |
|                                                    |              |                                             |                                                                                            |                                                                                                            |                                                                                                                          |                                                                                |                                    |                                                                                                                  | Average total work                                                     | ↑* |
|                                                    |              |                                             |                                                                                            |                                                                                                            |                                                                                                                          |                                                                                |                                    |                                                                                                                  | Fatigue index                                                          | ↔  |
|                                                    |              |                                             |                                                                                            |                                                                                                            |                                                                                                                          |                                                                                |                                    |                                                                                                                  | RPE                                                                    | ↓* |
| <b>Barwood et al., 2013 [96]</b>                   | Single blind | Endurance                                   | 8 M; 21 ± 2 y; 177 ± 6 cm; 72.8 ± 7.1 kg                                                   | Recreationally active adults                                                                               | Lower body graduated compression garment; and ‘sham’ compression garment (one size larger than manufacturer recommended) | 20 ± 3 at calf, 11 ± 2 at thigh (CG); 17 ± 4 at calf, 10 ± 2 at thigh (‘sham’) | Running                            | 15 min submaximal treadmill run at fixed speed; 5 km TT<br><br>(Hot conditions: 35.2°C ± 0.1°C)                  | Running time                                                           | ↔  |
|                                                    |              |                                             |                                                                                            |                                                                                                            |                                                                                                                          |                                                                                |                                    |                                                                                                                  | Running pace profile                                                   | ↔  |
|                                                    |              |                                             |                                                                                            |                                                                                                            |                                                                                                                          |                                                                                |                                    |                                                                                                                  | Body temp ( <i>aural, skin, mean</i> )                                 | ↔  |
|                                                    |              |                                             |                                                                                            |                                                                                                            |                                                                                                                          |                                                                                |                                    |                                                                                                                  | Quadriceps temp ( <i>CG &amp; ‘sham’</i> )                             | ↑* |
|                                                    |              |                                             |                                                                                            |                                                                                                            |                                                                                                                          |                                                                                |                                    |                                                                                                                  | Sweat production                                                       | ↔  |
|                                                    |              |                                             |                                                                                            |                                                                                                            |                                                                                                                          |                                                                                |                                    |                                                                                                                  | Fluid consumption                                                      | ↔  |
|                                                    |              |                                             |                                                                                            |                                                                                                            |                                                                                                                          |                                                                                |                                    |                                                                                                                  | Cardiac frequency                                                      | ↔  |
|                                                    |              |                                             |                                                                                            |                                                                                                            |                                                                                                                          |                                                                                |                                    |                                                                                                                  | RPE                                                                    | ↔  |
|                                                    |              |                                             |                                                                                            |                                                                                                            |                                                                                                                          |                                                                                |                                    |                                                                                                                  | Thermal comfort & sensation                                            | ↔  |
|                                                    |              |                                             |                                                                                            |                                                                                                            |                                                                                                                          |                                                                                |                                    |                                                                                                                  | Average pressure ( <i>CG only</i> )                                    | ↑* |
| <b>Bernhardt &amp; Anderson, 2005 [55]</b>         | Crossover    | Limb ROM & power; agility; speed; endurance | 10 M, 3 F; 25.7 y                                                                          | Recreationally active adults                                                                               | Elasticized compression shorts (Coreshorts, Abbotsford, Canada)                                                          | NR                                                                             | Balance, jumping, agility, running | Active ROM tests; timed balance trial; vertical jump; T-test agility trial; 20m dash; 20m multistage shuttle run | Vertical jump                                                          | ↔  |
|                                                    |              |                                             |                                                                                            |                                                                                                            |                                                                                                                          |                                                                                |                                    |                                                                                                                  | Agility                                                                | ↔  |
|                                                    |              |                                             |                                                                                            |                                                                                                            |                                                                                                                          |                                                                                |                                    |                                                                                                                  | 20m speed                                                              | ↔  |
|                                                    |              |                                             |                                                                                            |                                                                                                            |                                                                                                                          |                                                                                |                                    |                                                                                                                  | 20m shuttle run                                                        | ↔  |
|                                                    |              |                                             |                                                                                            |                                                                                                            |                                                                                                                          |                                                                                |                                    |                                                                                                                  | Active ROM hyperextension & abduction                                  | ↔  |
|                                                    |              |                                             |                                                                                            |                                                                                                            |                                                                                                                          |                                                                                |                                    |                                                                                                                  | Active ROM flexion                                                     | ↑* |
|                                                    |              |                                             |                                                                                            |                                                                                                            |                                                                                                                          |                                                                                |                                    |                                                                                                                  | Joint angle replication                                                | ↔  |
|                                                    |              |                                             |                                                                                            |                                                                                                            |                                                                                                                          |                                                                                |                                    |                                                                                                                  | Balance                                                                | ↔  |
| <b>Born et al., 2014 [58]</b>                      | Crossover    | Explosive power                             | 24 F; 25 ± 3 y; 167 ± 3 cm; 61 ± 5 kg (study 1); 23 ± 2 y; 169 ± 3 cm; 61 ± 6 kg (study 2) | Track & field and team sport athletes                                                                      | Waist-to-ankle tights (no brand reported) <sup>b</sup>                                                                   | 20.8 ± 5.8 at calf, 19.25 ± 4.2 at gluteus maximus                             | Running                            | 30 x 30m sprints (1 sprint per minute)                                                                           | Repeat sprint performance (final 10 sprints)                           | ↑* |
|                                                    |              |                                             |                                                                                            |                                                                                                            |                                                                                                                          |                                                                                |                                    |                                                                                                                  | O <sub>2</sub> uptake, ventilation                                     | ↔  |
|                                                    |              |                                             |                                                                                            |                                                                                                            |                                                                                                                          |                                                                                |                                    |                                                                                                                  | HR                                                                     | ↔  |
|                                                    |              |                                             |                                                                                            |                                                                                                            |                                                                                                                          |                                                                                |                                    |                                                                                                                  | Blood [La-]                                                            | ↔  |
|                                                    |              |                                             |                                                                                            |                                                                                                            |                                                                                                                          |                                                                                |                                    |                                                                                                                  | Tissue saturation, oxyhaemoglobin, deoxyhaemoglobin, total haemoglobin | ↔  |
|                                                    |              |                                             |                                                                                            |                                                                                                            |                                                                                                                          |                                                                                |                                    |                                                                                                                  | RPE ( <i>upper leg muscles</i> )                                       | ↓* |
|                                                    |              |                                             |                                                                                            |                                                                                                            |                                                                                                                          |                                                                                |                                    |                                                                                                                  | Step length                                                            | ↑* |
|                                                    |              |                                             |                                                                                            |                                                                                                            |                                                                                                                          |                                                                                |                                    |                                                                                                                  | EMG muscle activation ( <i>rectus femoris</i> )                        | ↑* |
|                                                    |              |                                             |                                                                                            |                                                                                                            |                                                                                                                          |                                                                                |                                    |                                                                                                                  | Step frequency                                                         | ↔  |
|                                                    |              |                                             |                                                                                            |                                                                                                            |                                                                                                                          |                                                                                |                                    |                                                                                                                  | Hip flexion angle                                                      | ↓* |
| <b>Born et al., 2014 [45]</b>                      | Crossover    | Endurance                                   | 6 M, 4 F; 23 ± 7 y; 173 ± 10 cm; 68.2 ± 13.9 kg                                            | International level ice speed skaters, VO <sub>2</sub> max 58 ± 5.2 mL.kg <sup>-1</sup> .min <sup>-1</sup> | Waist-to-ankle tights (94% polyamide and 6% Lycra) under normal race suit <sup>c</sup>                                   | 20.3 ± 2.3 at thigh, 24.4 ± 3.1 at calf                                        | Ice speed skating                  | 3000m race simulation                                                                                            | Lap times                                                              | ↔  |
|                                                    |              |                                             |                                                                                            |                                                                                                            |                                                                                                                          |                                                                                |                                    |                                                                                                                  | Velocity                                                               | ↔  |
|                                                    |              |                                             |                                                                                            |                                                                                                            |                                                                                                                          |                                                                                |                                    |                                                                                                                  | Mm tissue oxygenation, local blood volume O <sub>2</sub> uptake        | ↔  |

**Table S1: During Exercise Studies**

|                                                            |                 |                               |                                                      |                                                                                 |                                                                                                                        |                                                                                                                                                         |         |                                                                                                                              |                                                                          |     |
|------------------------------------------------------------|-----------------|-------------------------------|------------------------------------------------------|---------------------------------------------------------------------------------|------------------------------------------------------------------------------------------------------------------------|---------------------------------------------------------------------------------------------------------------------------------------------------------|---------|------------------------------------------------------------------------------------------------------------------------------|--------------------------------------------------------------------------|-----|
|                                                            |                 |                               |                                                      |                                                                                 |                                                                                                                        |                                                                                                                                                         |         |                                                                                                                              | Ventilation                                                              | ↔   |
|                                                            |                 |                               |                                                      |                                                                                 |                                                                                                                        |                                                                                                                                                         |         |                                                                                                                              | HR                                                                       | ↔   |
|                                                            |                 |                               |                                                      |                                                                                 |                                                                                                                        |                                                                                                                                                         |         |                                                                                                                              | Blood [La-]                                                              | ↔   |
|                                                            |                 |                               |                                                      |                                                                                 |                                                                                                                        |                                                                                                                                                         |         |                                                                                                                              | RPE                                                                      | ↔   |
| <b>Bovenschen, Booij &amp; Van Der Vleuten, 2013 [187]</b> | Cross-sectional | Endurance                     | 8 M, 2 F; 40.5 ± 15.8 y; 173 ± 7.7 cm; 67 ± 9.1 kg   | Trained recreational runners; average distance per week 12.3 ± 3.2 kms          | Graduated compression stockings (Arion International BV, Geleen, The Netherlands) worn on one leg <sup>d</sup>         | MR 25–35 mm Hg                                                                                                                                          | Running | 10km track run (comfortable pace); maximal incremental treadmill test                                                        | Leg volume ( <i>post 10km run, post treadmill test</i> )                 | ↓*  |
|                                                            |                 |                               |                                                      |                                                                                 |                                                                                                                        |                                                                                                                                                         |         |                                                                                                                              | Leg complaints questionnaire                                             | ↔   |
| <b>Brighenti, 2013 [97]</b>                                | Crossover       | Endurance                     | 7 subjects; 32.0 ± 5.8 y; 180 ± 8 cm; 77.77 ± 9.4 kg | Amateur cyclists & triathletes                                                  | Whole body partial compression (X-BIONIC Effector TM) <sup>e</sup>                                                     | NR                                                                                                                                                      | Cycling | Incremental max test; 20 mins cycling @ 80% VT; TTE at VO <sub>2</sub> max power                                             | VO <sub>2</sub> max                                                      | ↔   |
|                                                            |                 |                               |                                                      |                                                                                 |                                                                                                                        |                                                                                                                                                         |         |                                                                                                                              | TTE                                                                      | ↔   |
|                                                            |                 |                               |                                                      |                                                                                 |                                                                                                                        |                                                                                                                                                         |         |                                                                                                                              | HR ( <i>steady state submax cycling</i> )                                | ↔   |
|                                                            |                 |                               |                                                      |                                                                                 |                                                                                                                        |                                                                                                                                                         |         |                                                                                                                              | RPE                                                                      | ↔   |
|                                                            |                 |                               |                                                      |                                                                                 |                                                                                                                        |                                                                                                                                                         |         |                                                                                                                              | Thermal sensation, sweating sensation                                    | ↔   |
|                                                            |                 |                               |                                                      |                                                                                 |                                                                                                                        |                                                                                                                                                         |         | <i>(Hot conditions: 32°C)</i>                                                                                                |                                                                          |     |
| <b>Bringard, Perrey &amp; Belluye, 2006 [10]</b>           | Crossover       | Endurance                     | 6 M, 31.2 ± 5.4 y; 177.3 ± 6.6 cm; 66.0 ± 8.8 kg     | Middle distance runners                                                         | Tights (Decathlon®, unspecified length) <sup>f</sup>                                                                   | NR                                                                                                                                                      | Running | VO <sub>2</sub> max test (incremental, 3-min stages); plus 15-mins running at ~80% VO <sub>2</sub> max; both on indoor track | VO <sub>2</sub> max                                                      | ↔   |
|                                                            |                 |                               |                                                      |                                                                                 |                                                                                                                        |                                                                                                                                                         |         |                                                                                                                              | Body mass loss                                                           | ↔   |
|                                                            |                 |                               |                                                      |                                                                                 |                                                                                                                        |                                                                                                                                                         |         |                                                                                                                              | Minute ventilation                                                       | ↔   |
|                                                            |                 |                               |                                                      |                                                                                 |                                                                                                                        |                                                                                                                                                         |         |                                                                                                                              | HR                                                                       | ↔   |
|                                                            |                 |                               |                                                      |                                                                                 |                                                                                                                        |                                                                                                                                                         |         |                                                                                                                              | O <sub>2</sub> cost ( <i>12 km/h, CG and elastic tights</i> )            | ↓*  |
|                                                            |                 |                               |                                                      |                                                                                 |                                                                                                                        |                                                                                                                                                         |         |                                                                                                                              | VO <sub>2</sub> slow component                                           | ↓*  |
|                                                            |                 |                               |                                                      |                                                                                 |                                                                                                                        |                                                                                                                                                         |         |                                                                                                                              | RPE                                                                      | ↔   |
|                                                            |                 |                               |                                                      |                                                                                 |                                                                                                                        |                                                                                                                                                         |         |                                                                                                                              | Clothing comfort                                                         | ↔   |
|                                                            |                 |                               |                                                      |                                                                                 |                                                                                                                        |                                                                                                                                                         |         |                                                                                                                              | Thermal stress, sweating sensation                                       | ↔   |
| <b>Broatch, Bishop &amp; Halson, 2018 [36]</b>             | Crossover       | Aerobic & anaerobic endurance | 9 M, 11 F; 26.5 ± 4 y; 174.9 ± 6.4 cm; 73.2 ± 9.4 kg | Recreationally active; 310.8 ± 144.8 min of moderate-vigorous activity per week | Waist-to-ankle tights (2XU Elite Compression Tights, Melbourne, Australia)                                             | 11.7 ± 2.3 at thigh, 26.4 ± 6.4 at calf, 21.5 ± 8.2 mm Hg at ankle                                                                                      | Cycling | 4 x (10 × 6-s maximal sprints); 24s recovery b/n bouts, 2 min recovery b/n sets                                              | Peak power                                                               | ↑S* |
|                                                            |                 |                               |                                                      |                                                                                 |                                                                                                                        |                                                                                                                                                         |         |                                                                                                                              | Work performed per sprint (kJ)                                           | ↑*  |
|                                                            |                 |                               |                                                      |                                                                                 |                                                                                                                        |                                                                                                                                                         |         |                                                                                                                              | Mm blood flow (v. lateralis)                                             | ↑S* |
|                                                            |                 |                               |                                                      |                                                                                 |                                                                                                                        |                                                                                                                                                         |         |                                                                                                                              | Mm VO <sub>2</sub>                                                       | ↔   |
|                                                            |                 |                               |                                                      |                                                                                 |                                                                                                                        |                                                                                                                                                         |         |                                                                                                                              | VO <sub>2</sub>                                                          | ↔   |
|                                                            |                 |                               |                                                      |                                                                                 |                                                                                                                        |                                                                                                                                                         |         |                                                                                                                              | Heart rate                                                               | ↓*  |
|                                                            |                 |                               |                                                      |                                                                                 |                                                                                                                        |                                                                                                                                                         |         |                                                                                                                              | Blood [La-]                                                              | ↔   |
|                                                            |                 |                               |                                                      |                                                                                 |                                                                                                                        |                                                                                                                                                         |         |                                                                                                                              | Blood pH, bicarbonate & base excess                                      | ↔   |
| <b>Broatch et al., 2020(a) [28]</b>                        | Crossover       | Running biomechanics          | 13 M; 22 ± 3 y; 185.0 ± 5.5 cm; 84.1 ± 9.4 kg        | Amateur Australian Rules footballers; 395 ± 110 mins exercise/week              | Waist-to-ankle tights (2XU Elite Compression Tights, Melbourne, Australia)                                             | 21.8 ± 6.0 at thigh, 17.2 ± 6.2 at calf, 13.2 ± 2.9 at ankle                                                                                            | Running | 2 x 4 min treadmill bouts (2 min @ 12 km/h, 2 min @ 15km/h) w 30s rest                                                       | Thigh mm displacement ( <i>12km/h, medial-lateral</i> )                  | ↓*  |
|                                                            |                 |                               |                                                      |                                                                                 |                                                                                                                        |                                                                                                                                                         |         |                                                                                                                              | Calf mm displacement ( <i>12km/h, medial-lateral</i> )                   | ↓*  |
|                                                            |                 |                               |                                                      |                                                                                 |                                                                                                                        |                                                                                                                                                         |         |                                                                                                                              | Calf mm displacement ( <i>12 &amp; 15km/h, anterior-posterior</i> )      | ↓*  |
|                                                            |                 |                               |                                                      |                                                                                 |                                                                                                                        |                                                                                                                                                         |         |                                                                                                                              | All other mm displacement & acceleration                                 | ↔   |
| <b>Broatch et al., 2020(b) [28]</b>                        | Crossover       | Running biomechanics          | 14 M; 27 ± 5 y; 180.9 ± 7.3 cm; 77.8 ± 8.4 kgs       | Recreationally active; 294 ± 155 exercise mins/week                             | Waist-to-ankle tights (three types: 2XU Elite Compression Tights, Nike Pro Zonal Compression Tights & Under Armor (UA) | 21.8 ± 6.0 at thigh, 17.2 ± 6.2 at calf, 13.2 ± 2.9 at ankle (2XU); 21.5 ± 5.1 thigh, 14.6 ± 4.9 calf, 9.1 ± 2.5 ankle (Nike); 18.9 ± 6.3 thigh, 11.4 ± | Running | 4 x 9 min treadmill bouts (3 min @ 8 km/h, 3 min @ 10km/h, 3 min @ 12km/h) w 30s rest                                        | Running economy                                                          | ↔   |
|                                                            |                 |                               |                                                      |                                                                                 |                                                                                                                        |                                                                                                                                                         |         |                                                                                                                              | Mm displacement ( <i>VAS, GAS; 8 &amp; 10km/h; medial-lateral; 2XU</i> ) | ↓*  |
|                                                            |                 |                               |                                                      |                                                                                 |                                                                                                                        |                                                                                                                                                         |         |                                                                                                                              | Mm displacement ( <i>VAS; 10 km/h; anterior-posterior; Nike</i> )        | ↓*  |
|                                                            |                 |                               |                                                      |                                                                                 |                                                                                                                        |                                                                                                                                                         |         |                                                                                                                              | Mm displacement ( <i>VAS, 8km/h, vertical, Nike</i> )                    | ↓*  |

**Table S1: During Exercise Studies**

|                                          |                         |                   |                                                    |                                                                                                               |                                                                                                               |                                                                            |                        |                                                                                                                                                                                                     |                                                                                       |     |
|------------------------------------------|-------------------------|-------------------|----------------------------------------------------|---------------------------------------------------------------------------------------------------------------|---------------------------------------------------------------------------------------------------------------|----------------------------------------------------------------------------|------------------------|-----------------------------------------------------------------------------------------------------------------------------------------------------------------------------------------------------|---------------------------------------------------------------------------------------|-----|
|                                          |                         |                   |                                                    |                                                                                                               | Charged Compression Tights)                                                                                   | 4.7 calf, 7.7 ± 3.1 ankle (UA)                                             |                        |                                                                                                                                                                                                     | Mm displacement ( <i>VAS, 10km/h, vertical, 2XU</i> )                                 | ↓*  |
|                                          |                         |                   |                                                    |                                                                                                               |                                                                                                               |                                                                            |                        |                                                                                                                                                                                                     | Soft tissue vibrations ( <i>VAS, 8km/h, Nike, 2XU</i> )                               | ↓*  |
|                                          |                         |                   |                                                    |                                                                                                               |                                                                                                               |                                                                            |                        |                                                                                                                                                                                                     | Soft tissue vibrations ( <i>GAS, 10km/h, 2XU, UA</i> )                                | ↓*  |
|                                          |                         |                   |                                                    |                                                                                                               |                                                                                                               |                                                                            |                        |                                                                                                                                                                                                     | Soft tissue vibrations ( <i>GAS, 10km/h, UA</i> )                                     | ↓*  |
|                                          |                         |                   |                                                    |                                                                                                               |                                                                                                               |                                                                            |                        |                                                                                                                                                                                                     | Soft tissue vibrations ( <i>VAS, 12km/h, 2XU</i> )                                    | ↓*  |
|                                          |                         |                   |                                                    |                                                                                                               |                                                                                                               |                                                                            |                        |                                                                                                                                                                                                     | Mm activation ( <i>iEMG, GAS, all CGs</i> )                                           | ↓*  |
| <b>Broatch et al., 2021 [37]</b>         | Crossover               | Anaerobic power   | 8 M, 2 F; 27.4 ± 6.3 y; 181 ± 6 cm; 74.5 ± 14.0 kg | Recreationally active; min. 90 mins moderate-high exercise/week                                               | Waist-to-ankle tights (2XU Elite MCS Tights, Melbourne, Australia)                                            | 11.1 ± 3.1 at mid-thigh, 20.6 ± 3.7 at maximal calf                        | Cycling                | 4 sets of 10 × 6s maximal Wattbike sprints (24s recovery after each sprint, 2 mins recovery after each set)                                                                                         | Peak, mean power (RSE total)                                                          | ↔   |
|                                          |                         |                   |                                                    |                                                                                                               |                                                                                                               |                                                                            |                        |                                                                                                                                                                                                     | Single-sprint performance peak & mean power                                           | ↔   |
|                                          |                         |                   |                                                    |                                                                                                               |                                                                                                               |                                                                            |                        |                                                                                                                                                                                                     | Microvascular blood volume ( <i>post-exercise, 60 mins post</i> )                     | ↓*  |
|                                          |                         |                   |                                                    |                                                                                                               |                                                                                                               |                                                                            |                        |                                                                                                                                                                                                     | Femoral artery diameter, blood velocity & flow ( <i>post-exercise, 60 mins post</i> ) | ↓*  |
|                                          |                         |                   |                                                    |                                                                                                               |                                                                                                               |                                                                            |                        |                                                                                                                                                                                                     | Total mm haemoglobin ( <i>after set 1, set 2-4</i> )                                  | ↓*  |
|                                          |                         |                   |                                                    |                                                                                                               |                                                                                                               |                                                                            |                        |                                                                                                                                                                                                     | Oxyhemoglobin post-exercise                                                           | ↓*  |
|                                          |                         |                   |                                                    |                                                                                                               |                                                                                                               |                                                                            |                        |                                                                                                                                                                                                     | Normalised mm de-oxyhemoglobin concentration                                          | ↑*  |
|                                          |                         |                   |                                                    |                                                                                                               |                                                                                                               |                                                                            |                        |                                                                                                                                                                                                     | Blood [La-] ( <i>after first set only</i> )                                           | ↓*  |
|                                          |                         |                   |                                                    |                                                                                                               |                                                                                                               |                                                                            |                        |                                                                                                                                                                                                     | Blood glucose                                                                         | ↔   |
|                                          |                         |                   |                                                    |                                                                                                               |                                                                                                               |                                                                            |                        |                                                                                                                                                                                                     | Heart rate RPE                                                                        | ↔   |
| <b>Brophy-Williams et al., 2019 [35]</b> | Crossover               | Endurance         | 12 M; 30.5 ± 8.1 y; 181 ± 7 cm; 77.8 ± 6.5 kg      | Well trained runners; best 5 km run time 19:29 ± 1:18 min:s                                                   | Knee high compression socks (Performance Run Sock, 2XU, Melbourne, Australia)                                 | 37 ± 4 at maximal calf girth, 31 ± 4 at upper ankle, 23 ± 4 at lower ankle | Running                | 5 km treadmill time trial                                                                                                                                                                           | TT performance                                                                        | ↔   |
|                                          |                         |                   |                                                    |                                                                                                               |                                                                                                               |                                                                            |                        |                                                                                                                                                                                                     | Decrement from TT1 to TT2                                                             | ↓M* |
|                                          |                         |                   |                                                    |                                                                                                               |                                                                                                               |                                                                            |                        |                                                                                                                                                                                                     | Oxygen consumption                                                                    | ↔   |
|                                          |                         |                   |                                                    |                                                                                                               |                                                                                                               |                                                                            |                        |                                                                                                                                                                                                     | Blood [La-]                                                                           | ↔   |
|                                          |                         |                   |                                                    |                                                                                                               |                                                                                                               |                                                                            |                        |                                                                                                                                                                                                     | Calf cross-sectional area                                                             | ↔   |
|                                          |                         |                   |                                                    |                                                                                                               |                                                                                                               |                                                                            |                        |                                                                                                                                                                                                     | RPE                                                                                   | ↔   |
|                                          |                         |                   |                                                    |                                                                                                               |                                                                                                               |                                                                            |                        |                                                                                                                                                                                                     | Mm soreness                                                                           | ↔   |
|                                          |                         |                   |                                                    |                                                                                                               |                                                                                                               |                                                                            |                        |                                                                                                                                                                                                     | Fatigue                                                                               | ↔   |
| <b>Burden &amp; Glaister, 2012 [42]</b>  | Single blind, crossover | Endurance, sprint | 10 M; 34.6 ± 6.8 y; 180 ± 5 cm, 82.2 ± 10.4 kg     | Well trained triathletes & cyclists; VO <sub>2</sub> max: 50.86 ± 6.81 mL.kg <sup>-1</sup> .min <sup>-1</sup> | Ionized and non-ionized compression tights (Canterbury of New Zealand, Auckland, New Zealand)                 | Both CGs: 15 at anterior thigh, 21 at anterior midshank                    | Cycling                | 3 sprint trials (30s at 150% VO <sub>2</sub> max, 3 mins recovery, 3s-second Wingate test, 3 mins recovery); 3 endurance trials (30 minutes at 60% pVO <sub>2</sub> max, 5 mins recovery, 10 km TT) | Wingate peak power, mean power, fatigue                                               | ↔   |
|                                          |                         |                   |                                                    |                                                                                                               |                                                                                                               |                                                                            |                        |                                                                                                                                                                                                     | 10km TT                                                                               | ↔   |
|                                          |                         |                   |                                                    |                                                                                                               |                                                                                                               |                                                                            |                        |                                                                                                                                                                                                     | Mean VO <sub>2</sub>                                                                  | ↔   |
|                                          |                         |                   |                                                    |                                                                                                               |                                                                                                               |                                                                            |                        |                                                                                                                                                                                                     | Mean HR                                                                               | ↔   |
|                                          |                         |                   |                                                    |                                                                                                               |                                                                                                               |                                                                            |                        |                                                                                                                                                                                                     | Blood [La-] ( <i>non-ionized</i> )                                                    | ↓*  |
|                                          |                         |                   |                                                    |                                                                                                               |                                                                                                               |                                                                            |                        |                                                                                                                                                                                                     |                                                                                       |     |
| <b>Cavanaugh et al., 2016 [69]</b>       | Crossover               | Balance           | 7 M, 5 F; (mean) 23.9 y; 170.25 cm; 73.3 kg        | Recreationally active                                                                                         | Knee compression sleeve on dominant leg (Cramer ESS, 79% nylon, 20% spandex, 1% other materials) <sup>§</sup> | NR                                                                         | Balance; BW resistance | Y Balance Test; drop jump landing; 4 sets of unilateral BW Bulgarian squats to failure (1 min rest b/n sets)                                                                                        | Muscular endurance ( <i>no. of squats</i> )                                           | ↔   |
|                                          |                         |                   |                                                    |                                                                                                               |                                                                                                               |                                                                            |                        |                                                                                                                                                                                                     | Balance ( <i>post-ex, 10 mins post</i> )                                              | ↔   |
|                                          |                         |                   |                                                    |                                                                                                               |                                                                                                               |                                                                            |                        |                                                                                                                                                                                                     | Mm activation ( <i>drop jump landing</i> )                                            | ↔   |

**Table S1: During Exercise Studies**

|                                                  |                                |                                |                                                        |                                                                                                                                                    |                                                                                                                                                               |                                                                                                             |                        |                                                                                                                   |                                                                                                                                                                                                                                                             |                                                 |
|--------------------------------------------------|--------------------------------|--------------------------------|--------------------------------------------------------|----------------------------------------------------------------------------------------------------------------------------------------------------|---------------------------------------------------------------------------------------------------------------------------------------------------------------|-------------------------------------------------------------------------------------------------------------|------------------------|-------------------------------------------------------------------------------------------------------------------|-------------------------------------------------------------------------------------------------------------------------------------------------------------------------------------------------------------------------------------------------------------|-------------------------------------------------|
| <b>Chang et al., 2022 [172]</b>                  | Crossover                      | Proprioception, endurance      | 10 M, 10 F; 38.6 ± 11.3 y; 169.3 ± 10.4 cm; 60.3 ± 9.5 | Trained runners; 4.7 ± 3.5 y experience                                                                                                            | Graduated socks (CEP, Germany; 69% polyamide, 16% spandex, and 15% polypropylene)                                                                             | MR: 22 at ankle, 18 at knee                                                                                 | Running                | 21 km treadmill trial as (3 x 7km self-paced blocks)                                                              | Total time<br>HR<br>Blood [La-]<br>RPE<br>Ankle proprioception (21km)<br>Ankle proprioception (pre, 7km, 14km)                                                                                                                                              | ↔<br>↔<br>↔<br>↔<br>↑*<br>↔                     |
| <b>Chaudhari et al., 2014 [105]</b>              | Crossover                      | Running biomechanics           | 6 M, 13 F; 23.4 ± 4.8 y; 176 ± 11 cm; 71.1 ± 12.7 kg   | Recreationally active (min. 3 times a week), various sports                                                                                        | Directional <sup>h</sup> compression shorts (CoreShort PRO, Under Armour, USA) <sup>i</sup>                                                                   | NR                                                                                                          | Running                | 45° unanticipated side-step run-to-cut manoeuvres to both sides (8 trials per condition)                          | Total GRF<br>Mm activation (adductor longus, all five phases of stance)                                                                                                                                                                                     | ↔<br>↓*                                         |
| <b>Cheng &amp; Xiong, 2019 [173]</b>             | Crossover                      | Walking biomechanics           | 16 M; 22.5 ± 0.9 y; 171 ± 4.9 cm; 63.5 ± 6.9 kg        | Healthy                                                                                                                                            | Knee-high stockings (72% polyamide, 28% lycra)                                                                                                                | MR: 30–40                                                                                                   | Walking                | 6 min treadmill walking at 5km/h; force plate walking trials (duration unknown)                                   | RER<br>Mm activation<br>Step frequency, step length, step variability, joint ROM, joint powers<br>Peak knee extension (early stance)<br>Peak knee flexion (late swing)<br>Peak ankle dorsiflexion (early stance)<br>Peak ankle plantar flexion (late swing) | ↔<br>↔<br>↔<br>↑*<br>↓*<br>↑*<br>↓*             |
| <b>Coza et al., 2012 [92]</b>                    | Cross-sectional interventional | Mm tissue oxygenation dynamics | 15 M, 25.8 ± 4.9 y; 70.6 ± 4.3 kg                      | Healthy; history of consistent moderate daily exercise                                                                                             | Elastic compression sleeve, (custom made, one size, 75% polyester, 25% spandex)                                                                               | NR                                                                                                          | BW resistance exercise | 2 x 40 heel raises per minute for 2 mins (10 mins rest b/n sets)                                                  | Mean tissue O <sub>2</sub> index recovery (first 2 mins)<br>Mm energy use                                                                                                                                                                                   | ↑*<br>↔                                         |
| <b>Dandrieux, Thouze &amp; Rossi, 2020 [107]</b> | Crossover                      | Running biomechanics           | 12 M; 24 ± 2.5 y; 176.7 ± 5.2 cm; 72.42 ± 5.8 kg       | Recreationally active; exercise 1-4 times/week                                                                                                     | Waist-to-knee shorts (Kalenji, Decathlon)                                                                                                                     | NR                                                                                                          | Running                | 7 x 30s treadmill runs (8, 10, 12 km/h without slope; 8 km/h1 uphill at 10%; 8, 10, 12 k/ h downhill w 10% slope) | Peak acceleration (VAS)<br>Mean power                                                                                                                                                                                                                       | ↓*<br>↓*                                        |
| <b>Dascombe et al., 2011 [31]</b>                | Crossover                      | Endurance                      | 11 M; 28.4 ± 10 y; 177.3 ± 4.7 cm; 72.6 ± 8.0 kg       | Well-trained middle-distance runners & triathletes; VO <sub>2</sub> max 59.0 ± 6.7 mL.kg <sup>-1</sup> .min <sup>-1</sup> ; best 3km time <12 mins | Waist-to-ankle tights (Sport Skins Classic, Skins, Campbelltown, NSW; 76% Nylon/Meryl microfiber and 24% Roica Spandex); undersized & normal sized conditions | 13.7 ± 2.3 at thigh, 19.2± 3.2 at calf (normal sized); 15.9 ± 2.6 at thigh, 21.7 ± 4.3 at calf (undersized) | Running                | Progressive maximal test (3 min stages); TTE @ 90% vVO <sub>2</sub> max                                           | VO <sub>2</sub> max<br>TTE<br>Blood [La-]<br>VO <sub>2</sub> , O <sub>2</sub> pulse<br>Deoxyhaemoglobin (8-10km/h)<br>Running economy<br>Oxyhaemoglobin, TOI (8-10km/h)<br>Regional blood flow, deoxyhaemoglobin (12-18km/h)<br>HR (12-18km/h)              | ↔<br>↔<br>↔<br>↑*<br>↑*<br>↓*<br>↓*<br>↑*<br>↓* |
| <b>Dascombe et al., 2013 [48]</b>                | Crossover                      | Speed, power, endurance        | 5 M, 2 F; 23.4 ± 2.3 y; 77.5 ± 8.6 kg                  | Elite flat-water kayakers; competing at junior or senior international level for previous 18 months                                                | Unisex full-length long-sleeved tops (Sport Skins Classic, Skins TM, Campbelltown, NSW, Australia; 76% nylon                                                  | NR                                                                                                          | Kayak ergometry        | Six step incremental test; 4-minute max distance test                                                             | Power (LT, AnT)<br>Metres covered<br>Peak & mean power<br>Stroke rate<br>HR (LT, AnT)<br>Blood [La-] (LT)<br>Blood [La-] (AnT)                                                                                                                              | ↔<br>↔<br>↔<br>↔<br>↑M<br>↑M<br>↔               |

**Table S1:** During Exercise Studies

|                                        |                |                       |                                                               |                                                                                                           | & meryl microfibre,<br>24% roica spandex)                                                                                   |                                                            |                    |                                                                                                                           | Total & relative work (kJ)                                                                                                                                                                                                                                                                             | ↔                                                                            |
|----------------------------------------|----------------|-----------------------|---------------------------------------------------------------|-----------------------------------------------------------------------------------------------------------|-----------------------------------------------------------------------------------------------------------------------------|------------------------------------------------------------|--------------------|---------------------------------------------------------------------------------------------------------------------------|--------------------------------------------------------------------------------------------------------------------------------------------------------------------------------------------------------------------------------------------------------------------------------------------------------|------------------------------------------------------------------------------|
| <b>de Britto et al., 2017 [56]</b>     | Crossover      | Jump biomechanics     | 27 F; 23 ± 4 y; 161 ± 5 cm; 60.6 ± 7.9 kg                     | Recreationally active; min. 90 mins weekly activity                                                       | Waist-to-knee shorts (Adidas TechFit)                                                                                       | NR                                                         | Jumping            | Jump-landing tasks: forward jump, forward jump w countermovement; 20cm & 40cm drop jumps w countermovement; vertical jump | Jump height<br>Knee valgus<br>(initial contact, landing phase; forward jump, drop jumps, vertical jump)<br>Knee flexion (initial contact, all jumps)<br>Peak knee flexion (landing phase, all jumps)                                                                                                   | ↔<br>↓M<br>↓S<br>↓S                                                          |
| <b>Del Coso et al., 2014 [47]</b>      | Parallel group | Endurance             | 36 subjects; 35.4 ± 5.8 y; 176 ± 6.5 cm; 73.2 ± 5.6 kg        | Trained triathletes; 4.7 ± 1.1 y experience                                                               | Socks (Race and Recovery®, Compressport®, Paris, France; 60% polyamide, 25% elastane, 15% polyester)                        | NR                                                         | Triathlon          | Competitive half-Ironman triathlon (at 29 ± 3°C and 73 ± 8 % relative humidity)                                           | Race time<br>Jump height<br>Swimming, running velocity<br>Cycling velocity<br>Mb (post-race)<br>CK (post-race)<br>Serum glucose, chloride, potassium & calcium<br>Sodium concentration<br>Blood osmolality<br>Body mass change<br>Blood [La-] (post-race)<br>Mm soreness<br>RPE<br>Lower limb mm power | ↔<br>↔<br>↔<br>↑S<br>↓L<br>↓M<br>↔<br>↑S<br>↑L<br>↔<br>↔<br>↔<br>↔<br>↔<br>↔ |
| <b>de Souza et al., 2018 [89]</b>      | Crossover      | Endurance             | 10 subjects; 29.1 ± 10.47 y; 175.9 ± 5.78 cm; 72.18 ± 4.57 kg | Trained runners; can run 4:00-6:00 min/km pace                                                            | Socks (Oxer® Run)                                                                                                           | MR: 15 to 20                                               | Running            | 10km outdoor race (conditions unknown)                                                                                    | Mean velocity<br>Running pace<br>Total time<br>SBP & DBP<br>HR<br>Peak torque, fatigue index<br>CMJ, squat jump                                                                                                                                                                                        | ↔<br>↔<br>↔<br>↔<br>↔<br>↔<br>↔                                              |
| <b>Doan et al., 2003 [54]</b>          | Crossover      | Team sport attributes | 10 M, 10 F; 19.6 ± 1.1 y; 174 ± 5 cm; 67.2 ± 6.8 kg           | (USA) Division I track athletes, sprint/jump specialists                                                  | Waist-to-knee shorts (Model 950 GH, Antibody Inc., Cheltenham, MD; 75% closed cell neoprene, 25% butyl rubber) <sup>j</sup> | NR                                                         | Sprinting, jumping | 60m sprint; three maximal CMJs                                                                                            | Sprint time<br>CMJ height<br>Squat depth<br>Skin temperature<br>Hip ROM<br>Knee ROM<br>Mm oscillation (longitudinal, anterior-posterior)                                                                                                                                                               | ↔<br>↑*<br>↓*<br>↑*<br>↓*<br>↔<br>↓*                                         |
| <b>Driller &amp; Halson, 2013 [39]</b> | Crossover      | Endurance             | 12 M; 30 ± 6 y, 180 ± 5 cm, 75.6 ± 5.8 kg                     | Highly trained A/B grade cyclists, VO <sub>2</sub> peak 66.6 ± 3.4 mL.kg <sup>-1</sup> .min <sup>-1</sup> | Waist-to-ankle tights (2XU Elite compression tights. Hawthorn, VIC, Australia)                                              | MR: ~18 at ankle, ~10 at gluteus maximus                   | Cycling            | 30 min cycling as (15 min @ 70% of VO <sub>2</sub> max power; 15 min TT)                                                  | Mean power output<br>HR (first 15 mins @ fixed workload)<br>Blood [La-]<br>Calf & thigh girths<br>Perceived soreness                                                                                                                                                                                   | ↑*<br>↓S<br>↔<br>↔<br>↔                                                      |
| <b>Driller et al., 2021 [60]</b>       | Crossover      | Team sport attributes | 12 M; 22 ± 5 y, 179 ± 5 cm; 72 ± 7 kg                         | Competitive basketball players                                                                            | Waist-to-ankle tights (Li-Ning, PowerShell AULM043-I, Beijing, China)                                                       | 7.6 ± 2.6 at ankle, 14.0 ± 2.6 at calf, 8.3 ± 1.8 at thigh | Basketball         | CMJ; Margaria-Kalamen stair-climb test; Basketball Exercise Simulation Test (12 mins)                                     | CMJ jump height, power<br>6m sprint time<br>Sprint decrement<br>Circuit decrement<br>Stair climb test power decrement<br>RPE                                                                                                                                                                           | ↔<br>↑S*<br>↔<br>↔<br>↓S<br>↔                                                |

**Table S1: During Exercise Studies**

|                                                 |                         |                                 |                                                   |                                                                                                   |                                                                                                                                                                                                                                                               |                                                                                                                                                                 |                  |                                                                                                                                                                                  |                                                                                                                                                                                                                                                                                                                                                                                                                                                                      |
|-------------------------------------------------|-------------------------|---------------------------------|---------------------------------------------------|---------------------------------------------------------------------------------------------------|---------------------------------------------------------------------------------------------------------------------------------------------------------------------------------------------------------------------------------------------------------------|-----------------------------------------------------------------------------------------------------------------------------------------------------------------|------------------|----------------------------------------------------------------------------------------------------------------------------------------------------------------------------------|----------------------------------------------------------------------------------------------------------------------------------------------------------------------------------------------------------------------------------------------------------------------------------------------------------------------------------------------------------------------------------------------------------------------------------------------------------------------|
| <b>Ehrström et al., 2018 [174]</b>              | Crossover               | Endurance, running biomechanics | 13 M; 38.6 ± 5.7 y; 175.8 ± 5.1 cm; 72.1 ± 4.7 kg | Well trained trail runners; 8.8 ± 3.4 y of trail running practice; regular competitive racing     | Stockings (Salomon R S/Lab Exo)                                                                                                                                                                                                                               | MR; 20–25 at middle calf, 18–20 at upper calf, 16–18 at mid-thigh                                                                                               | Downhill running | 40 min downhill treadmill run @ 55% VO <sub>2</sub> max                                                                                                                          | CMJ ↔<br>VO <sub>2</sub> ↔<br>Ventilation ↔<br>HR ↔<br>RER ↓M*<br>Mm soreness ( <i>post-exercise</i> ) ↔<br>Mm soreness ( <i>24 hrs post</i> ) ↓*<br>Soft tissue vibrations ( <i>vastus lateralis</i> ) ↓*<br>Voluntary activation ( <i>knee extensors</i> ) ↓*<br>Peripheral fatigue ( <i>knee extensors, plantar flexors</i> ) ↔<br>Decline in knee extensors MVC ( <i>24 hrs post</i> ) ↓*<br>Step frequency ↓M*                                                  |
| <b>Engel et al., 2018 [167]</b>                 | Single-blind, crossover | Endurance                       | 5 F, 2 M; 18 ± 2 y; 165 ± 5 cm; 58 ± 5 kg         | National level elite climbers; 16.1 ± 5.6 hrs training per week; training experience: 8.7 ± 2.2 y | Arm sleeves (VERTICS, Wiesbaden, Germany; 75% polyamide & 25% spandex) <sup>k</sup>                                                                                                                                                                           | MR; 22.4 at radial styloid process, 12.4 at olecranon process                                                                                                   | Indoor climbing  | 3 x 3 climbing bouts (max 4 mins per wall; 4 mins rest after each climb; 6 mins rest after each series)                                                                          | Blood [La-] ↔<br>HR ↔<br>Mm pain ↔<br>RPE ↓L <sup>^</sup><br><br><i>*Large effect size by partial eta squared, &gt;0.14</i>                                                                                                                                                                                                                                                                                                                                          |
| <b>Faulkner et al., 2013 [175]</b>              | Crossover               | Speed                           | 11 M; 23.7 ± 5.7 y; 178 ± 8 cm; 75.3 ± 10.0 kg    | Trained runners; training >3 times per week specific to 400-m running                             | Two conditions: waist-to-ankle tights (A400 Skins, Sydney, Australia; Memory MX Fabric; 76% nylon tactel microfiber, 24% elastane); and shorts (A400 Skins, Sydney, Australia; Memory MX Fabric; 76% nylon tactel microfiber, 24% elastane) with calf sleeves | 6.2 ± 1.2 at achilles; 13.2 ± 2.5 at GAS; 6.2 ± 1.2 at gluteal (tights); 14.2 ± 2.4 at achilles, 19.9 ± 2.4 at GAS 5.9 ± 0.8 at gluteal (shorts & calf sleeves) | Running          | 6 x 400m (2 trials per condition)                                                                                                                                                | 400m time ↔<br>Split times ↔<br>Blood [La-] ↔<br>HR ↔<br>Average RPE ( <i>both CGs</i> ) ↓*<br>Comfort & optimal tightness ( <i>shorts condition, after 2nd trial only</i> ) ↑*                                                                                                                                                                                                                                                                                      |
| <b>Fuji et al., 2017 [176]</b>                  | Crossover               | Endurance                       | 9 M; 24.7 ± 2.0 y; 172 ± 3 cm; 66.3 ± 3.3 kg      | Healthy; VO <sub>2</sub> max 52.0 ± 6.0 mL.kg <sup>-1</sup> .min <sup>-1</sup>                    | Graduated stockings (ALCARE Limited (REGUARD CG Tights EX33, ALCARE, Tokyo, Japan) <sup>l</sup>                                                                                                                                                               | 26.4 ± 5.3 at ankle, 17.5 ± 4.4 at calf, 6.1 ± 2.0 at thigh                                                                                                     | Cycling          | 45 min (or until body temp raised ~1.5°C above baseline) @ 60% peak O <sub>2</sub> uptake, at 60 rpm (semi recumbent)<br><br><i>Hot conditions (30°C, 50% relative humidity)</i> | Exercise time ↔<br>HR ↔<br>Mean arterial pressure ↔<br>Body weight ↔<br>Estimated arterial CO <sub>2</sub> pressure ( <i>baseline, 35, 40 mins</i> ) ↑*<br>Minute ventilation ↔<br>Tidal volume ↔<br>Respiratory frequency ↔<br>O <sub>2</sub> uptake ↔<br>CO <sub>2</sub> output ↔<br>RER ↔<br>Body temp ( <i>oesophageal</i> ) ↔<br>Peak sweat rate ↔<br>Skin temp ( <i>calf, 20-35 mins</i> ) ↓*<br>Forearm vascular conductance ( <i>30-40 min</i> ) ↑*<br>RPE ↔ |
| <b>Geldenhuis, Swart &amp; Bosch, 2019 [22]</b> | Parallel group          | Endurance                       | 14 M, 6 F; 34 ± 5.6 y; 175 ± 5 cm; 74.4 ± 10.2 kg | Trained endurance runners; min. average training distance of 50 kms/week                          | Below-knee stockings (68% polyamide, 30% Drynamix (polyester), 2% elastane fabric)                                                                                                                                                                            | NR                                                                                                                                                              | Running          | 56km competitive outdoor ultramarathon, incl. 6-wk training period pre-competition                                                                                               | Overall running pace ↔<br>Finish time ↔<br>Mm soreness ( <i>2 days post</i> ) ↑*<br>Calf & ankle circumference ( <i>training period</i> ) ↔                                                                                                                                                                                                                                                                                                                          |

**Table S1: During Exercise Studies**

|                                                   |                              |                             |                                                      |                                                                                             |                                                                                                                                  |                                            |                       |                                                                                                                                                                                 |                                                                     |     |
|---------------------------------------------------|------------------------------|-----------------------------|------------------------------------------------------|---------------------------------------------------------------------------------------------|----------------------------------------------------------------------------------------------------------------------------------|--------------------------------------------|-----------------------|---------------------------------------------------------------------------------------------------------------------------------------------------------------------------------|---------------------------------------------------------------------|-----|
|                                                   |                              |                             |                                                      |                                                                                             |                                                                                                                                  |                                            |                       |                                                                                                                                                                                 | Ankle circumference ( <i>2 days post</i> )                          | ↓L* |
|                                                   |                              |                             |                                                      |                                                                                             |                                                                                                                                  |                                            |                       |                                                                                                                                                                                 | Mm thickness ( <i>GAS</i> )                                         | ↔   |
|                                                   |                              |                             |                                                      |                                                                                             |                                                                                                                                  |                                            |                       |                                                                                                                                                                                 | Pennation angle ( <i>2 days post</i> )                              | ↓*  |
| <b>Gimenes et al., 2019 [61]</b>                  | Parallel group, single blind | Team sport attributes       | 22 subjects; 18.4 ± 0.5 y; 179 ± 5 cm; 70.8 ± 7.2 kg | State, national & international level soccer players                                        | Stockings (3/4 model with closed toe, Sigvaris Performance; composed of 69% polyamide, 17% polyester, 14% elastane) <sup>m</sup> | MR: 20-30 mm Hg                            | Soccer                | 2 x 90 min soccer matches (w 72 hrs recovery)                                                                                                                                   | Sprints completed                                                   | ↔   |
|                                                   |                              |                             |                                                      |                                                                                             |                                                                                                                                  |                                            |                       |                                                                                                                                                                                 | Total distance                                                      | ↔   |
|                                                   |                              |                             |                                                      |                                                                                             |                                                                                                                                  |                                            |                       |                                                                                                                                                                                 | Distance covered ( <i>speed zones 1-3</i> )                         | ↔   |
|                                                   |                              |                             |                                                      |                                                                                             |                                                                                                                                  |                                            |                       |                                                                                                                                                                                 | Distance covered ( <i>speed zones 4-5, match 1 only</i> )           | ↑*  |
|                                                   |                              |                             |                                                      |                                                                                             |                                                                                                                                  |                                            |                       |                                                                                                                                                                                 | Distance covered ( <i>speed zone 4, match 2 only</i> )              | ↑*  |
|                                                   |                              |                             |                                                      |                                                                                             |                                                                                                                                  |                                            |                       |                                                                                                                                                                                 | Accelerations ( <i>-50 to -3 m/s<sup>2</sup></i> )                  | ↑*  |
|                                                   |                              |                             |                                                      |                                                                                             |                                                                                                                                  |                                            |                       |                                                                                                                                                                                 | Body mass                                                           | ↔   |
|                                                   |                              |                             |                                                      |                                                                                             |                                                                                                                                  |                                            |                       |                                                                                                                                                                                 | Mean & peak HR                                                      | ↔   |
|                                                   |                              |                             |                                                      |                                                                                             |                                                                                                                                  |                                            |                       |                                                                                                                                                                                 | Perceived recovery                                                  | ↔   |
|                                                   |                              |                             |                                                      |                                                                                             |                                                                                                                                  |                                            |                       |                                                                                                                                                                                 | Mm soreness ( <i>post-match 2</i> )                                 | ↓L* |
| <b>Goh et al., 2011 [95]</b>                      | Crossover                    | Endurance                   | 10 M; 29.0 ± 10 y; 180 ± 6 cm; 78.5 ± 6.3 kg         | Recreational runners; VO <sub>2</sub> max 58.7 ± 2.7 mL.kg <sup>-1</sup> .min <sup>-1</sup> | Waist-to-ankle tights (Skins <sup>TM</sup> Sport Men's Compression Long Tights, Campbelltown, Australia)                         | 13.6 ± 3.4 at calf, 8.6 ± 1.9 at thigh     | Running               | 20-min treadmill run @ first VT; then TTE @ VO <sub>2</sub> max velocity<br><br><i>Two conditions: hot (32°C, 50% relative humidity) and cold (10°C, 50% relative humidity)</i> | RPE                                                                 | ↔   |
|                                                   |                              |                             |                                                      |                                                                                             |                                                                                                                                  |                                            |                       |                                                                                                                                                                                 | Internal load ( <i>RPE*mins</i> )                                   | ↔   |
|                                                   |                              |                             |                                                      |                                                                                             |                                                                                                                                  |                                            |                       |                                                                                                                                                                                 | Average TTE ( <i>32°C only</i> )                                    | ↑M  |
|                                                   |                              |                             |                                                      |                                                                                             |                                                                                                                                  |                                            |                       |                                                                                                                                                                                 | Body mass                                                           | ↔   |
|                                                   |                              |                             |                                                      |                                                                                             |                                                                                                                                  |                                            |                       |                                                                                                                                                                                 | Rectal temp                                                         | ↔   |
|                                                   |                              |                             |                                                      |                                                                                             |                                                                                                                                  |                                            |                       |                                                                                                                                                                                 | Thigh & calf temperature ( <i>10°C only</i> )                       | ↑*  |
|                                                   |                              |                             |                                                      |                                                                                             |                                                                                                                                  |                                            |                       |                                                                                                                                                                                 | Absolute O <sub>2</sub> consumption                                 | ↔   |
|                                                   |                              |                             |                                                      |                                                                                             |                                                                                                                                  |                                            |                       |                                                                                                                                                                                 | HR                                                                  | ↔   |
|                                                   |                              |                             |                                                      |                                                                                             |                                                                                                                                  |                                            |                       |                                                                                                                                                                                 | RPE ( <i>32°C only</i> )                                            | ↓*  |
| <b>Gupta, Bryers &amp; Clothier, 2015 [110]</b>   | Crossover                    | Motor control               | 38 M; 22.1 ± 2.8 y; 181 ± 6.7 cm; 78.3 ± 10.8 kg     | Recreationally active; sport & exercise 3–15 hours per week                                 | Waist-to-ankle tights (Skins, Campbelltown, Australia) <sup>n</sup>                                                              | NR                                         | Hopping               | Single leg hopping at 2.2 Hz to volitional exhaustion                                                                                                                           | Total duration                                                      | ↔   |
|                                                   |                              |                             |                                                      |                                                                                             |                                                                                                                                  |                                            |                       |                                                                                                                                                                                 | Duration of flight & contact phases                                 | ↔   |
|                                                   |                              |                             |                                                      |                                                                                             |                                                                                                                                  |                                            |                       |                                                                                                                                                                                 | Vertical height displacement ( <i>flight &amp; loading phases</i> ) | ↔   |
|                                                   |                              |                             |                                                      |                                                                                             |                                                                                                                                  |                                            |                       |                                                                                                                                                                                 | Normalised peak vertical GRF                                        | ↔   |
|                                                   |                              |                             |                                                      |                                                                                             |                                                                                                                                  |                                            |                       |                                                                                                                                                                                 | Vertical stiffness                                                  | ↔   |
| <b>Higgins, Naughton &amp; Burgess, 2009 [63]</b> | Crossover                    | Speed, power, endurance     | 9 F, 22.6 ± 4.6 y; 176 ± 4 cm; 67.8 ± 6.6 kg         | Trained netball players, 4.6 ± 3.0 y at elite state level                                   | Unspecified length tights (Skins, Sydney, Australia) <sup>o</sup>                                                                | NR                                         | Team sport activities | 4 x 15-minute game specific circuit for netball                                                                                                                                 | 20 min sprint time ( <i>each quarter</i> )                          | ↔   |
|                                                   |                              |                             |                                                      |                                                                                             |                                                                                                                                  |                                            |                       |                                                                                                                                                                                 | CMJ flight time ( <i>each quarter</i> )                             | ↔   |
|                                                   |                              |                             |                                                      |                                                                                             |                                                                                                                                  |                                            |                       |                                                                                                                                                                                 | Distance covered ( <i>total</i> )                                   | ↔   |
|                                                   |                              |                             |                                                      |                                                                                             |                                                                                                                                  |                                            |                       |                                                                                                                                                                                 | Distance travelled at slow pace ( <i>1.5 m·s<sup>-1</sup></i> )     | ↑S  |
|                                                   |                              |                             |                                                      |                                                                                             |                                                                                                                                  |                                            |                       |                                                                                                                                                                                 | Distance travelled at fast pace ( <i>3.5 m·s<sup>-1</sup></i> )     | ↑L  |
|                                                   |                              |                             |                                                      |                                                                                             |                                                                                                                                  |                                            |                       |                                                                                                                                                                                 | HR ( <i>throughout</i> )                                            | ↔   |
|                                                   |                              |                             |                                                      |                                                                                             |                                                                                                                                  |                                            |                       |                                                                                                                                                                                 | Blood [La-] ( <i>end quarter</i> )                                  | ↔   |
| <b>Hintzy et al., 2019 [112]</b>                  | Crossover                    | Mm vibration                | 12 M; 25.3 ± 3.6 y; 180 ± 6 cm; 77.8 ± 5.8 kg        | Physically active; non-cyclists                                                             | Waist-to-knee shorts (Mavic, S.A.S., France), 3 levels of compression                                                            | MR: 2-, 6-, and 15- at thigh per condition | Cycling               | 18 min pedalling test (9 mins @ moderate intensity, 9 mins @ high intensity; three randomized vibration frequencies: 18.3, 22.4, and 26.3 Hz)                                   | HR                                                                  | ↔   |
|                                                   |                              |                             |                                                      |                                                                                             |                                                                                                                                  |                                            |                       |                                                                                                                                                                                 | EMG ( <i>right vastus lateralis, high intensity cycling</i> )       | ↓*  |
|                                                   |                              |                             |                                                      |                                                                                             |                                                                                                                                  |                                            |                       |                                                                                                                                                                                 | RPE                                                                 | ↔   |
|                                                   |                              |                             |                                                      |                                                                                             |                                                                                                                                  |                                            |                       |                                                                                                                                                                                 | Vibration transfer ( <i>85, 100 rpm; mod, high intensity</i> )      | ↓*  |
| <b>Hong et al., 2022 [52]</b>                     | Crossover                    | Mm function, proprioception | 6 M, 6 F; 22.8 ± 2.2 y; 169.6 ± 7.2                  | Recreationally active; exercise at least 3 times per week                                   | Waist-to-knee tights (FreeZone CG, BOURTEX, Taiwan;                                                                              | MR: 27.3 at ankle, 21.5 at                 | Jumping               | Repeated CMJs @ 45 bpm until fatigue                                                                                                                                            | Jump height, power ( <i>baseline</i> )                              | ↑*  |
|                                                   |                              |                             |                                                      |                                                                                             |                                                                                                                                  |                                            |                       |                                                                                                                                                                                 | Mm oxygen saturation ( <i>baseline; 10 mins post</i> )              | ↑*  |



**Table S1: During Exercise Studies**

|                                                  |                         |                                                 |                                                              |                                                          |                                                                                                                              |                                                 |                      |                                                                                                                                                             |                                                                                                                                                                                                                                                                                                                      |
|--------------------------------------------------|-------------------------|-------------------------------------------------|--------------------------------------------------------------|----------------------------------------------------------|------------------------------------------------------------------------------------------------------------------------------|-------------------------------------------------|----------------------|-------------------------------------------------------------------------------------------------------------------------------------------------------------|----------------------------------------------------------------------------------------------------------------------------------------------------------------------------------------------------------------------------------------------------------------------------------------------------------------------|
|                                                  |                         |                                                 | cm; 67.2 ± 12.7 kg                                           |                                                          | 70% polyester fiber, 30% elastic fiber)                                                                                      | knee, 16.8 knee to thigh                        |                      |                                                                                                                                                             | Deoxygenation, reoxygenation ( <i>quadriceps</i> ) ↑*                                                                                                                                                                                                                                                                |
|                                                  |                         |                                                 |                                                              |                                                          |                                                                                                                              |                                                 |                      |                                                                                                                                                             | Mm soreness ↔                                                                                                                                                                                                                                                                                                        |
|                                                  |                         |                                                 |                                                              |                                                          |                                                                                                                              |                                                 |                      |                                                                                                                                                             | Displacement of centre of pressure ( <i>mediolateral, 20 mins post</i> ) ↓*                                                                                                                                                                                                                                          |
| <b>Hooper et al., 2015 [64]</b>                  | Crossover, within-group | Sport-specific power, accuracy & proprioception | 21 M; 20.5 ± 21.1 y; 179.6 ± 4.3 cm; 82.7 ± 5.7 kg           | Elite college level baseball pitchers or golfers         | Upper body garment (Under Armour, 85% nylon and 15% elastane) <sup>p</sup>                                                   | NR                                              | Baseball & golf      | <i>Baseball</i> : 25 pitches (indoor strike zone target);<br><br><i>Golf</i> : 10 full swings, 10 target drills, 10 chips, 10 putts (indoor golf simulator) | ( <i>Baseball</i> )<br>Pitching accuracy ↑*<br>X axis pitching error ↓*<br>Strikes thrown ↔<br>Fastball velocity ↔<br>Performance improvement & level of enjoyment ↑*<br><br>( <i>Golf</i> )<br>Driving, approach shot & chipping accuracy ↑*<br>Driving distance ↔<br>Putting accuracy & putts made ↔<br>Comfort ↑* |
| <b>Houghton, Dawson &amp; Maloney, 2009 [99]</b> | Crossover               | Team sport attributes                           | 10 M; 21 [19–23] y; 178 [174–181] cm; 71.10 [65.74–76.46] kg | Trained amateur field hockey players                     | Knee-length shorts & short-sleeved shirt (SKINS; 76% Nylon & Meryl Microfibre, 24% Roica Spandex) under normal hockey attire | NR                                              | Simulated team sport | 4 x 15 min bouts of Loughborough intermittent shuttle test (varied-intensity 20 m shuttle running; 3 mins rest)                                             | 15m sprint time ↔<br>HR, ↔<br>Blood [La-] ↔<br>Body mass ↔<br>Mean skin temperature ↑*<br>Core body temp ( <i>rest, stage 1</i> ) ↑M<br>Core body temp ( <i>stages 2-4</i> ) ↑S<br>Sweat rate ↑S<br>Total clothing mass ↑S<br>RPE ↔                                                                                  |
| <b>Hsu et al., 2020 [103]</b>                    | Crossover               | Mm activation                                   | 8 M; 24.9 ± 2.3 y; 170.0 ± 3.3 cm; 60.0 ± 7.1 kg             | Recreational runners; 8-12 hrs training/wk               | Waist-to-ankle tights (74% polyamide and 26% Spandex)                                                                        | 32 ± 2 at shank, 22 ± 2 at thigh, 16 ± 2 at hip | Running              | 40 min treadmill running @ 75% VO2 max (1% gradient)                                                                                                        | Blood [La-] ↔<br>RPE ↔<br>Mm activation (GAS, semitendinosus; stance phase) ↓*<br>Mm activation ( <i>rectus femoris, swing phase</i> ) ↓*<br>Mm median frequency ( <i>Semitendinosus, stance phase</i> ) ↑*<br>Mm median frequency ( <i>GAS, swing phase</i> ) ↑*                                                    |
| <b>Hung, 2022 [108]</b>                          | Crossover               | Balance                                         | 10 M, 15 F; 20-30 y                                          | Healthy                                                  | Waist-to-ankle tights (no further details)                                                                                   | NR                                              | Balance task         | Athletic Single Leg Stability Test (Biodex Balance System)                                                                                                  | Biodex Stability index ↓*                                                                                                                                                                                                                                                                                            |
| <b>Kato et al., 2018 [188]</b>                   | Crossover               | Mm architecture & stiffness                     | 9 M, 7 F; 33.3 ± 5.4 y; 165.6 ± 5.8 cm; 59.9 ± 7.8 kg        | Recreationally active                                    | Waist-to-ankle tights (A400 Skins, Sydney, Australia)                                                                        | NR                                              | BW resistance        | 3 x 20 heel-rise exercises with right lower limb (@ 46 beats/min by metronome), 2 mins rest b/n sets; 20s isometric MVC plantar flexion                     | Mm stiffness & steadiness ↑*<br>Plantar flexor MVC ↔<br>Mm thickness & fascicle length ↓*                                                                                                                                                                                                                            |
| <b>Kemmler et al., 2009 [34]</b>                 | Crossover               | Endurance                                       | 21 M; 39.3 ± 10.9 y; 178.5 ± 4.8 cm; 75.4 ± 7.4 kg           | Moderately trained runners; 40.1 ± 17 kms/week training; | Below-knee compressive stockings (Running 02max, cep GmbH & Co. KG,                                                          | MR: 24 at ankle, 18-20 at calf                  | Running              | Stepwise speed-incremented treadmill test to                                                                                                                | Max speed ↑S*<br>Time under load ↑S*<br>Total work ↑S*<br>Running speed ( <i>AnT, AT</i> ) ↑S*                                                                                                                                                                                                                       |

**Table S1: During Exercise Studies**

|                                         |                      |                        |                                                         |                                                                                               |                                                                                    |                                           |                       |                                                                                                                                                                   |                                                                                                                                                                                                                                                                                                                                                                                                                  |
|-----------------------------------------|----------------------|------------------------|---------------------------------------------------------|-----------------------------------------------------------------------------------------------|------------------------------------------------------------------------------------|-------------------------------------------|-----------------------|-------------------------------------------------------------------------------------------------------------------------------------------------------------------|------------------------------------------------------------------------------------------------------------------------------------------------------------------------------------------------------------------------------------------------------------------------------------------------------------------------------------------------------------------------------------------------------------------|
|                                         |                      |                        |                                                         | VO <sub>2</sub> max 52.0 ± 6.1 mL.kg <sup>-1</sup> .min <sup>-1</sup>                         | Himmelkron, Germany; 85% Polyamid and 15% Elastane (Lycra)) <sup>q</sup>           |                                           | volitional exhaustion | VO <sub>2</sub> max ↔<br>Blood [La-] ↔<br>HR ( <i>max</i> ) ↔<br>Ventilatory equivalent ↔<br>RER ↔                                                                |                                                                                                                                                                                                                                                                                                                                                                                                                  |
| Kerhervé et al., 2017 [23]              | Crossover            | Endurance; mm function | 14 M; 21.7 ± 3.0 y; 180.2 ± 4.7 cm; 72.3 ± 6.7 kg       | Recreational runners; trail running experience; min. 2 hrs training/wk                        | Graduated calf sleeves (UP, Thuasne Sport, Levallois-Perret, France)               | 23 ± 2 at GAS                             | Running               | ~24 km outdoor trail run as 10.8 km constant pace on flat terrain ( <i>bout 1</i> ), 13.2 km max pace on hilly terrain (1020m elevation change) ( <i>bout 2</i> ) | Average speed ↔<br>Average HR ↔<br>Mm tissue perfusion ↔<br>Mm V02 ↔<br>Tissue saturation index ↔<br>Fatigue ( <i>thigh</i> ) ↓*<br>Pain ( <i>Achilles tendon</i> ) ↓*<br>Fatigue & pain ( <i>calf</i> ) ↔<br>Aerial time ↑*<br>Leg stiffness ( <i>bout 1, 2</i> ) ↑*<br>Contact time ( <i>bout 2, post-ex</i> ) ↓*<br>Vertical stiffness ( <i>bout 2</i> ) ↑*<br>Step frequency ↔<br>Peak force ↔<br>Mm power ↔ |
| Kraemer et al., 1996 [51]               | Randomized block     | Anaerobic power        | 18 M, 18 F; 20.7 ± 3.1 y; 179.8 ± 7.7 cm; 74.7 ± 9.7 kg | Elite college volleyball players                                                              | Waist-to-knee shorts (88% nylon, 12% spandex), in normal and undersized conditions | NR                                        | Jumping               | 10 maximal countermovement jumps (one every 3 secs)                                                                                                               | Mean power production ( <i>males, undersized CG only</i> ) ↑*<br>Average force & power ( <i>normal CGs only</i> ) ↑*<br>Maximal jump power ↔                                                                                                                                                                                                                                                                     |
| Kraemer et al., 1998 [70]               | Randomized treatment | Isokinetic strength    | 10 M, 10 F; 24.2 ± 4.3 y; 172.5 ± 8.8 cm; 73.5 ± 11 kg  | Recreationally trained                                                                        | Waist-to-knee shorts (16% spandex)                                                 | NR                                        | Strength testing      | 70% 1RM reps on Tru-Squat machine until exhaustion; 3 x 50 maximal isokinetic knee extensions/flexions at 180°/sec (Cybex 600 dynamometer)                        | Squat strength ↔<br>Squat endurance ↔<br>Total work ↔<br>Peak torque ( <i>knee extensors &amp; flexors</i> ) ↔                                                                                                                                                                                                                                                                                                   |
| Leenoi & Widjaja, 2016 [177]            | Parallel group       | Endurance              | 16 M; 22.0 ± 0.6 y; 171.5 ± 1.4 cm; 65.7 ± 2.1 kg       | Moderately active                                                                             | Calf sleeve (Thai Parfun, Japan)                                                   | 4.4 ± 0.4 (location unknown)              | Walking               | 2 min treadmill walking @ 2 miles/hr, 45 mins @ 3.5 miles/hr (10% incline)                                                                                        | HR ↔<br>Stroke volume ↔<br>Cardiac output ↔<br>End diastolic volume ↔<br>Ejection fraction ↔<br>RPE ↓*                                                                                                                                                                                                                                                                                                           |
| Leoz-Abaurrea, Tam & Aguado, 2016 [178] | Crossover            | Endurance              | 12 M; 21 ± 6 y; 181 ± 5 cm; 76.0 ± 5.0 kg               | Untrained; VO <sub>2</sub> peak 53.7 ± 5.0 mL.kg <sup>-1</sup> .min <sup>-1</sup>             | Short sleeve ‘heat dissipating’ shirt (94% nylon, 4% elastane, 2% polypropylene)   | NR                                        | Cycling               | 4 x 14 min at ~50% VO <sub>2</sub> peak + 1 min active recovery<br><br>( <i>Hot conditions: ~40 ± 0.4°C, 35 ± 2 % relative humidity</i> )                         | Body mass change ↔<br>Sweat loss ↔<br>Body temperature ( <i>rectal, skin</i> ) ↔<br>RER ↔<br>Sweat retention ↓M*<br>HR ( <i>during</i> ) ↔<br>HR recovery ( <i>5, 10 mins post</i> ) ↓L*<br>VO <sub>2</sub> ( <i>during</i> ) ↔<br>VO <sub>2</sub> ( <i>10 mins post</i> ) ↑L*<br>CO <sub>2</sub> production ( <i>10 mins post</i> ) ↑M*                                                                         |
| Leoz-Abaurrea et                        | Crossover            | Endurance              | 10 M; 23 ± 3 y; 180.9 ±                                 | Recreational runners; VO <sub>2</sub> max 55.82 ± 4.84 mL.kg <sup>-1</sup> .min <sup>-1</sup> | Short sleeve ‘heat dissipating’ shirt (Energy accumulator;                         | 2.9 ± 1.5 at biceps brachii, 3.0 ± 1.0 at | Running               | 45-minute treadmill run @ 60% of the peak treadmill speed                                                                                                         | TTE ↓S*<br>Body mass change ↑S<br>Core temperature ↔                                                                                                                                                                                                                                                                                                                                                             |

**Table S1: During Exercise Studies**

|                                                   |           |                 |                                                       |                                                                                                                                                   |                                                                                                                                       |                                                                                                                 |                    |                                                                                                                                             |                                                                                                                                                                                                                                                                                                        |                                                                              |
|---------------------------------------------------|-----------|-----------------|-------------------------------------------------------|---------------------------------------------------------------------------------------------------------------------------------------------------|---------------------------------------------------------------------------------------------------------------------------------------|-----------------------------------------------------------------------------------------------------------------|--------------------|---------------------------------------------------------------------------------------------------------------------------------------------|--------------------------------------------------------------------------------------------------------------------------------------------------------------------------------------------------------------------------------------------------------------------------------------------------------|------------------------------------------------------------------------------|
| <b>al., 2016 [90]</b>                             |           |                 | 5.5 cm; 74.4 ± 7.7 kg                                 |                                                                                                                                                   | X-Bionic, Wollerau, Switzerland; 94% nylon, 4% elastane, 2% polypropylene)                                                            | triceps, 2.0 ± 0.5 at pectoralis major, 1.4 ± 0.5 at latissimus dorsi                                           |                    | (PTS), then TTE run @ 80% of PTS                                                                                                            | HR ( <i>recovery</i> )<br>Blood [La-] ( <i>recovery</i> )<br>VO <sub>2</sub><br>CO <sub>2</sub> production<br>Ventilation<br>Blood [La-] clearance<br>RPE                                                                                                                                              | ↑M*<br>↑M*<br>↔<br>↔<br>↔<br>↔<br>↔                                          |
| <b>Leoz-Abaurrea et al., 2017 [100]</b>           | Crossover | Endurance       | 12 M; 66 ± 2 y; 172 ± 6 cm; 77.9 ± 8.2 kg             | Trained cyclists; predicted VO <sub>2</sub> max 33.0 ± 5.0 mL.kg <sup>-1</sup> .min <sup>-1</sup> ; average 6,200 ± 3,500 km/yr for at least 20 y | Short sleeve 'heat dissipating' shirt (Energy accumulator; X-Bionic, Wollerau, Switzerland; 94% nylon, 4% elastane, 2% polypropylene) | 2.9 ± 1.5 at biceps brachii, 3.0 ± 1.0 at triceps, 2.0 ± 0.5 at pectoralis major, 1.4 ± 0.5 at latissimus dorsi | Cycling            | 60 mins (4 bouts @ 50% peak power output for 14 min, with 1-min rest)<br><br>( <i>Temperate conditions: ~25 °C, 66% relative humidity</i> ) | Body mass change<br>Sweat rate<br>Heat storage<br>HR<br>VO <sub>2</sub><br>CO <sub>2</sub> production<br>Ventilation<br>RER<br>Core temp<br>Body temperature<br>Thermal sensation<br>RPE ( <i>bout 1, 2</i> )<br>Sweating sensation<br>Clothing wetness sensation                                      | ↔<br>↔<br>↔<br>↔<br>↔<br>↔<br>↔<br>↔<br>↑M*<br>↑L*<br>↑M*<br>↓M,L*<br>↔<br>↔ |
| <b>Leoz-Abaurrea, Tam &amp; Aguado, 2019 [75]</b> | Crossover | Endurance       | 12 M, 4 F; 21.3 ± 5.7 y; 177 ± 8 cm; 73.3 ± 7.9 kg    | Untrained; VO <sub>2</sub> max 50.88 ± 8.00 mL.kg <sup>-1</sup> .min <sup>-1</sup>                                                                | Short sleeve 'heat dissipating' shirt (Energy accumulator; X-Bionic, Wollerau, Switzerland; 94% nylon, 4% elastane, 2% polypropylene) | 2.9 ± 1.5 at biceps brachii, 3.0 ± 1.0 at triceps, 2.0 ± 0.5 at pectoralis major, 1.4 ± 0.5 at latissimus dorsi | Cycling            | 4 bouts of cycling for 14-min at ~50% VO <sub>2</sub> peak, with 1-min rest between each bout                                               | Body mass change<br>Sweat rate<br>Heat storage<br>VO <sub>2</sub><br>HR<br>Skin temperature<br>Body temp<br>Rate of reduction in rectal temp ( <i>recovery period</i> )<br>Plasma pH, Hct, sodium, potassium<br>Shivering/sweating sensation<br>Clothing wetness sensation<br>Thermal sensation<br>RPE | ↔<br>↔<br>↔<br>↔<br>↔<br>↔<br>↓*<br>↓*<br>↔<br>↔<br>↔<br>↔<br>↔<br>↔         |
| <b>Loturco et al., 2016 [59]</b>                  | Crossover | Explosive power | 2 M, 6 F; 27.8 ± 6.7 y; 165.9 ± 10 cm; 62.2 ± 11.2 kg | Elite Paralympic sprinters (visual impairment, class T11)                                                                                         | Long sleeve shirt & waist-to-ankle tights (Under Armour, Baltimore, MD, USA; 84% nylon and 16% elastane)                              | NR                                                                                                              | Jumping, sprinting | Maximal unloaded squat jump, max loaded jump squat (Smith machine), 70m max sprint                                                          | Unloaded squat jump<br>Loaded jump squat<br>20m sprint<br>70m sprint                                                                                                                                                                                                                                   | ↑S<br>↔<br>↔<br>↔                                                            |
| <b>Lovell et al., 2011 [76]</b>                   | Crossover | Endurance       | 25 M; 21.6 ± 2.5 y; 182.2 ± 6.1 cm; 92.6 ± 7.7 kg     | Semi-professional rugby league players; 13.3 ± 3.3 y experience; 3-5 training sessions/wk                                                         | Waist-to-ankle graduated tights (Body Science, Gold Coast, Australia)                                                                 | 20 ± 2 at ankle, 15 ± 2 at calf                                                                                 | Running            | 6 stage submaximal treadmill test (5 mins at 6 km/h, 10km/h, 85% VO <sub>2</sub> max, 6 km/h, 85% VO <sub>2</sub> max, 6 km/h)              | RER ( <i>10 km/h, post-ex</i> )<br>Blood [La-] ( <i>10 km/h</i> )<br>HR ( <i>end of 6km/h recovery stages only</i> )<br>Blood [La-] ( <i>end of 6km/h recovery stages only</i> )<br>Blood pH<br>VO <sub>2</sub><br>VE                                                                                  | ↑*<br>↓*<br>↓*<br>↓*<br>↔<br>↔<br>↔                                          |

**Table S1: During Exercise Studies**

|                                            |                         |                    |                                                           |                                                                         |                                                                                                                                                                                                                               |                                                                                                                                          |                |                                                                                       |                                                                                                                                                                                                                                                                                                                                                                                                                                                                              |
|--------------------------------------------|-------------------------|--------------------|-----------------------------------------------------------|-------------------------------------------------------------------------|-------------------------------------------------------------------------------------------------------------------------------------------------------------------------------------------------------------------------------|------------------------------------------------------------------------------------------------------------------------------------------|----------------|---------------------------------------------------------------------------------------|------------------------------------------------------------------------------------------------------------------------------------------------------------------------------------------------------------------------------------------------------------------------------------------------------------------------------------------------------------------------------------------------------------------------------------------------------------------------------|
| <b>Lucas-Cuevas et al., 2017 [102]</b>     | Crossover               | Endurance          | 21 M, 15 F; 28.7 ± 4.13 y; 175.4 ± 5.6 cm; 65.47 ± 7.9 kg | Recreational runners; 40.5 ± 17.7 km per week training                  | Below-knee stockings (polyamide 85%, elastane 15%)                                                                                                                                                                            | MR: 24 at the ankle, 21 at the calf                                                                                                      | Running        | 20 min treadmill run @ 75% max aerobic speed (1% incline)                             | Perception of fatigue, comfort ↔<br>EMG activity ( <i>gastroc. lateralis</i> , min 0, 5) ↓*<br>EMG activity ( <i>GAS</i> , min 0) ↓*<br>Tibialis anterior EMG activity ↔<br>Peroneus longus EMG activity ↔                                                                                                                                                                                                                                                                   |
| <b>MacRae et al., 2012 [41]</b>            | Crossover               | Endurance          | 12 M; 26 ± 7 y; 180 ± 7 cm; 79 ± 9 kg                     | Recreational cyclists                                                   | Full length upper (neck and wrist to waist), lower (waist to ankle), (Skins TM, Riverwood, Australia) in normal and oversized conditions <sup>r</sup>                                                                         | 13 ± 2 at forearm, 11 ± 2 at thigh, 15 ± 1 at calf (normal sized); 9 ± 2 at forearm, 8 ± 2 at thigh, 13 ± 2 at calf (oversized)          | Cycling        | 60 min @ 65% VO <sub>2</sub> max; self-paced 6km TT (distance cues only)              | Time taken ↔<br>Mean power ↔<br>Cadence ↔<br>Exercising stroke volume ↔<br>SBP, DBP ↔<br>Rate of blood pressure increase at ejection ↔<br>Total peripheral resistance ↔<br>Left ventricular ejection time ↑*<br>Core & exposed skin temperature ↔<br>Covered skin temperature ↑*<br>Forearm perfusion & vapor pressure ( <i>scapula</i> ) ↑*<br>HR ( <i>steady-state</i> , end) ↑*<br>Cardiac output ↑*<br>Skin wetness ↔<br>RPE ↔<br>Comfort ( <i>normal size only</i> ) ↓* |
| <b>Martorelli et al., 2015 [68]</b>        | Single-blind, crossover | Mm power           | 15 M; 23.07 ± 3.92 y; 177 ± 6 cm; 76.13 ± 7.62 kg         | Resistance trained >6 months prior                                      | Arm sleeves (Skins, Sydney, Australia) <sup>k</sup>                                                                                                                                                                           | NR                                                                                                                                       | Power training | 6 sets x 6 reps bench press @ 50% 1RM (1 min rest b/n sets)                           | Peak power ↔<br>Mean power ( <i>bench press</i> ) ↔<br>Isometric strength ( <i>bench press</i> ) ↔<br>Reps to failure ( <i>bench press</i> ) ↔<br>Mm activation ( <i>EMG: triceps brachii, anterior deltoid, pec. major</i> ) ↔<br>Blood [La-] ↔                                                                                                                                                                                                                             |
| <b>Miyamoto et al., 2011 [71]</b>          | Crossover               | Isometric strength | 14 M; 25.6 ± 3.7 y; 173.3 ± 4.5 cm; 67.3 ± 5.9 kg         | Healthy                                                                 | Below knee stockings, in 'low' and 'high' pressure conditions                                                                                                                                                                 | MR; 12 upper calf, 14 lower calf, 18 ankle ('low'); 21 upper calf, 25 lower calf, 30 ankle ('high') <sup>f</sup>                         | BW resistance  | 15 x 10 on- legged calf raise repetitions w 30 s rest between sets                    | Reduction of MVC torque ↔<br>EMG amplitude ↔<br>Decline of mean power frequency ( <i>GAS, soleus</i> ; 'high' only) ↓*<br>Maximal compound motor action potential ( <i>M-wave amplitude</i> ) ↔<br>Decline of triplet torque ('high' only) ↓*                                                                                                                                                                                                                                |
| <b>Miyamoto &amp; Kawakami, 2015 [179]</b> | Crossover               | Endurance          | 15 M; 25.2 ± 2.6 y; 173.5 ± 4.6 cm; 66.1 ± 5.9 kg         | Recreationally active                                                   | Below-knee graduated stockings (PlusOneMagic, AK International, Japan), in four conditions: 'low' and 'high' pressure; uniform pressure distribution (UNI); localized pressure just over the gastrocnemius muscle belly (LOC) | MR: 18 at the ankle and 14 at GAS ('low'); 27 at the ankle and 21 at GAS ('high'); 21 at ankle & GAS (UNI); 10 at ankle, 21 at GAS (LOC) | Running        | 34.5 mins as: 1.5 min @ 6 km/h, 1.5 min @ 8 km/h, 1.5 min @ 10 km/h, 30 min @ 12 km/h | Mm proton transverse relaxation time ( <i>GAS, soleus, tibialis anterior</i> ; 'high', UNI, LOC) ↓*<br>Mm proton transverse relaxation time ( <i>gastroc. lateralis</i> ; 'high', LOC) ↓*<br>RPE ↔                                                                                                                                                                                                                                                                           |
| <b>Mizuno et al., 2017a [73]</b>           | Crossover               | Endurance          | 8 M; 23.4 ± 2.4 y; 170.1                                  | Active but not well-trained; minimum 1 day/wk exercise; VO <sub>2</sub> | Waist-to-ankle tights (custom-made; DESCENTE Ltd.,                                                                                                                                                                            | 26.9 ± 3.3 at thigh, 29.2 ± 3.8 at calf                                                                                                  | Running        | 120 min uphill treadmill running                                                      | CMJ ('high' compared to 'medium') ↑*<br>HR ('medium' only) ↓*<br>Blood glucose, [La-] ↔                                                                                                                                                                                                                                                                                                                                                                                      |

**Table S1: During Exercise Studies**

|                                           |                |           |                                                               |                                                                                                                                 |                                                                                                                                                                |                                                                                                                                                              |         |                                                                                                                            |                                                                                                                                                                                                                                                                                                                                                                                  |                                                                                                                                                                                                                                                                                            |
|-------------------------------------------|----------------|-----------|---------------------------------------------------------------|---------------------------------------------------------------------------------------------------------------------------------|----------------------------------------------------------------------------------------------------------------------------------------------------------------|--------------------------------------------------------------------------------------------------------------------------------------------------------------|---------|----------------------------------------------------------------------------------------------------------------------------|----------------------------------------------------------------------------------------------------------------------------------------------------------------------------------------------------------------------------------------------------------------------------------------------------------------------------------------------------------------------------------|--------------------------------------------------------------------------------------------------------------------------------------------------------------------------------------------------------------------------------------------------------------------------------------------|
|                                           |                |           | $\pm 2.2$ cm;<br>$62.3 \pm 3.3$ kg                            | max $50.6 \pm 4.1$<br>$\text{mL} \cdot \text{kg}^{-1} \cdot \text{min}^{-1}$                                                    | Osaka, Japan), in<br>'high' and 'medium'<br>pressure conditions                                                                                                | ('high'); $16.1 \pm$<br>$2.0$ at thigh,<br>$17.9 \pm 3.5$ at<br>calf<br>( 'medium' )                                                                         |         | (slope: 7%) @ 60%<br>$\text{VO}_2$ max                                                                                     | CK<br>Mb<br>Plasma IL-6 ( 'medium' only )<br>RPE (respiration, legs)                                                                                                                                                                                                                                                                                                             | $\leftrightarrow$<br>$\leftrightarrow$<br>$\downarrow^*$<br>$\leftrightarrow$                                                                                                                                                                                                              |
| <b>Mizuno et al., 2017b [74]</b>          | Parallel group | Endurance | 30 M; $21.9 \pm 0.6$ y; $173.9 \pm 1.7$ cm; $67.5 \pm 21$ kg  | Physically active (minimum 1 day/week); $\text{VO}_2$ max $54.0 \pm 1.3$ $\text{mL} \cdot \text{kg}^{-1} \cdot \text{min}^{-1}$ | Hip-to-knee tights and knee-to-ankle socks (custom-made, DESCENTE Ltd., Osaka, Japan)                                                                          | $.7 \pm 0.6$ at thigh (tights); $17.4 \pm 0.5$ at calf (socks)                                                                                               | Running | 120 min uphill treadmill running (slope: 7%) @ 55% $\text{VO}_2$ max                                                       | CMJ height<br>Drop jump<br>MVC (knee extension, plantar flexion)<br>HR<br>Running economy ( $\text{VO}_2$ )<br>Thigh & calf circumferences<br>Blood glucose<br>Blood [La-]<br>Serum free fatty acid<br>Plasma IL-6<br>High sensitive C-reactive protein (180min recovery period, tights only)<br>Serum Mb (180min recovery period, tights only)<br>RPE<br>Mm soreness<br>Fatigue | $\leftrightarrow$<br>$\leftrightarrow$<br>$\leftrightarrow$<br>$\leftrightarrow$<br>$\leftrightarrow$<br>$\leftrightarrow$<br>$\leftrightarrow$<br>$\leftrightarrow$<br>$\uparrow^*$<br>$\downarrow^*$<br>$\leftrightarrow$<br>$\leftrightarrow$<br>$\leftrightarrow$<br>$\leftrightarrow$ |
| <b>Montoye et al., 2021 [78]</b>          | Crossover      | Endurance | 6 F, 4 M; $29 \pm 7$ y, $173 \pm 5.9$ cm; $82.8 \pm 21.9$ kgs | Insufficiently active; $61.9 \pm 43.1$ exercise mins/wk                                                                         | Below-knee socks (Athletic Recovery Graduated Compression Stockings; Sigvaris Inc., Peachtree City, GA, USA; 67% dri-release polyester, 26% nylon, 7% spandex) | MR: minimum of 20 at ankle to 15 at calf                                                                                                                     | Walking | Graded maximal treadmill test (initial stage 3.5 miles/hr for 2 mins; +2% grade every 2 mins until exhaustion)             | HR (baseline)<br>HR (throughout)<br>Blood [La-] (stage 12)<br>Blood [La-] (end stage 13)<br>RPE (during)<br>RPE (end stage 13)<br>Soreness (24, 48 hrs post)<br>Tightness (24 hrs post)<br>Tightness (48 hrs post)<br>"Pulling" & "Tenderness" (48 hrs post)<br>"Annoyingness"                                                                                                   | $\downarrow$ M<br>$\leftrightarrow$<br>$\downarrow$ M<br>$\downarrow$ L<br>$\leftrightarrow$<br>$\downarrow$ L<br>$\downarrow$ M<br>$\downarrow$ M<br>$\downarrow$ L<br>$\downarrow$ M<br>$\leftrightarrow$                                                                                |
| <b>Naokazu &amp; Yasuo, 2014(a) [180]</b> | Crossover      | Endurance | 11 M; $25.6 \pm 3.7$ y; $173.3 \pm 4.5$ cm; $67.3 \pm 5.9$ kg | Healthy                                                                                                                         | Commercially available sporting compression short-tight (C3fit 3F09121; Goldwin, Japan) in "low" and "mid" pressure conditions                                 | $9.6 \pm 2.3$ at rectus femoris, $7.5 \pm 1.7$ at biceps femoris ("low"); $15.5 \pm 4.4$ at rectus femoris, $15.2 \pm 3.7$ at biceps femoris ("mid")         | Running | 34.5 min treadmill run (4.5-min warm-up running, 1.5 min @ 6 km/hr, 1.5 min @ 8 km/h, 1.5 min @ 10 km/h, 30 min @ 12 km/h) | Skeletal muscle proton transverse relaxation time (T2) (VAS, biceps femoris, semimembranosus, adductor magnus & longus)<br>T2 (gracilis, semitendinosus)<br>RPE (20 mins, "mid" only)<br>RPE (30 mins)                                                                                                                                                                           | $\downarrow^*$<br>$\leftrightarrow$<br>$\downarrow^*$<br>$\downarrow^*$                                                                                                                                                                                                                    |
| <b>Naokazu &amp; Yasuo, 2014(b) [180]</b> | Crossover      | Endurance | 11 M; $27.0 \pm 1.8$ y; $172.4 \pm 5.6$ cm; $66.8 \pm 6.2$ kg | Healthy                                                                                                                         | Specially made compression short-tights in "mid-high" and "high" conditions                                                                                    | $21.0 \pm 2.6$ at rectus femoris, $20.6 \pm 1.8$ at biceps femoris ("mid-high"); $26.5 \pm 3.8$ at rectus femoris, $25.6 \pm 3.9$ at biceps femoris ("high") | Running | 34.5 min treadmill run (4.5-min warm-up running, 1.5 min @ 6 km/hr, 1.5 min @ 8 km/h, 1.5 min @ 10 km/h, 30 min @ 12 km/h) | T2 (quadriceps femoris, adductor magnus, gracilis)<br>T2 (biceps fem, semitendinosus, adductor longus; "mid-high" only)<br>RPE                                                                                                                                                                                                                                                   | $\leftrightarrow$<br>$\downarrow^*$<br>$\leftrightarrow$                                                                                                                                                                                                                                   |

**Table S1: During Exercise Studies**

|                                              |                |                         |                                                          |                                                                                |                                                                                                                                                                       |                                                            |                  |                                                                                                                            |                                                                                                                                                                                                                                       |                                         |
|----------------------------------------------|----------------|-------------------------|----------------------------------------------------------|--------------------------------------------------------------------------------|-----------------------------------------------------------------------------------------------------------------------------------------------------------------------|------------------------------------------------------------|------------------|----------------------------------------------------------------------------------------------------------------------------|---------------------------------------------------------------------------------------------------------------------------------------------------------------------------------------------------------------------------------------|-----------------------------------------|
| <b>Nguyen, Eager &amp; Nguyen, 2019 [88]</b> | Crossover      | Cardiovascular function | 5 M, 3 F; 25.1 ± 3.8 y; 165.9 ± 8.3 cm; 61.4 ± 13.7 kg   | Healthy                                                                        | Long sleeved shirt & waist-to-ankle tights (SportSkins Classic CGs; Skins, Campbelltown, New South Wales, Australia; 24% Roica Spandex, 76% Meryl Microfiber & nylon) | NR                                                         | Running          | 10 min treadmill run as 2 mins @ 6km/h, increasing by 1km/h every 2 mins to a max 11km/h                                   | HR (7-9, 11km/h)                                                                                                                                                                                                                      | ↓*                                      |
| <b>Pavin et al., 2019 [62]</b>               | Parallel group | Team sport performance  | 20 F; 20.6 ± 3.9 y; 164 ± 4 cm; 59.6 ± 11.6 kg           | Amateur soccer players; 5.5 ± 0.8 hours of training/week, 1.5 ± 0.5 matches/wk | Graduated stockings (Sigvaris® Performance line, 69% polyamide, 17% polyester and 14% elastane)                                                                       | MR: 20 to 30-ankle to knee                                 | Soccer           | 90 min outdoor soccer match (2 x 45 min halves, 15 min interval)                                                           | Decrement in T-test agility<br>YoYo IE2 performance<br>HR<br>Decrement in heel-rise test<br>Perceived recovery<br>Comfort<br>Tightness<br>RPE                                                                                         | ↓L*<br>↔<br>↔<br>↓*<br>↔<br>↔<br>↔<br>↔ |
| <b>Pearce et al., 2009 [66]</b>              | Parallel group | Visuomotor tracking     | 8 M; 23–37 y of age                                      | Healthy                                                                        | Upper body, full sleeve (LineBreak, Australia)                                                                                                                        | NR                                                         | Dynamometry      | 35 maximal voluntary eccentric contractions of the elbow flexors (130° of extension at 90°s <sup>-1</sup> )                | Visuomotor tracking performance (post-exercise, 1, 2, 3 days-post)<br>Visuomotor tracking performance (5 days post)<br>Visuomotor tracking performance (7 days post)<br>MVC force<br>Strength<br>Mm soreness                          | ↑*<br>↑L<br>↑M<br>↔<br>↔<br>↔           |
| <b>Pereira et al., 2014a [65]</b>            | Parallel group | Isokinetic strength     | 24 M; 24.1 ± 5.2 y; 175.9 ± 6.2 cm; 78.6 ± 9.7 kg        | Resistance-trained (minimum 3 days/wk)                                         | Graduated arm sleeve (Skins, Sydney, New South Wales, Australia) <sup>k</sup>                                                                                         | NR                                                         | Dynamometry      | 4 sets of 10 unilateral maximal eccentric/concentric elbow flexion repetitions @ 120°s <sup>-1</sup>                       | Average torque<br>Work<br>Power                                                                                                                                                                                                       | ↔<br>↔<br>↔                             |
| <b>Pereira et al., 2014b [67]</b>            | Parallel group | Isokinetic strength     | 22 M; 24.6 ± 5.1 y; 175.4 ± 6.2 cm; 78.2 ± 10.1 kg       | Resistance-trained (6 months experience); minimum 3 days/wk training           | Graduated arm sleeve (Skins, Sydney, New South Wales, Australia) <sup>k</sup>                                                                                         | NR                                                         | Dynamometry      | 4 sets of 10 unilateral maximal eccentric/concentric elbow flexion repetitions @ 120°s <sup>-1</sup> (1 min rest b/n sets) | MVC<br>CK<br>Echo intensity (ultrasound)<br>Mm soreness                                                                                                                                                                               | ↔<br>↔<br>↔<br>↔                        |
| <b>Peseux et al., 2017 [181]</b>             | Crossover      | Endurance               | 14 subjects; 23.5 ± 0.6 y; 179.5 ± 1.6 cm; 73.1 ± 2.8 kg | Healthy athletes                                                               | Calf sleeves (Compressport R2, Compressport, Gland, Switzerland; 60% polyamide, 25% elastane, 15% polyester), in normal and undersized conditions                     | 24.0 ± 0.8 at GAS (normal); 37.2 ± 1.5 at GAS (undersized) | Walking, running | Incremental treadmill test (14 mins as 2 mins @ each intensity: 1, 2, 3, 4, 5, 6 and 7 km/h)                               | Tissue SO <sub>2</sub> (baseline, 1, 2km/h)<br>Tissue SO <sub>2</sub> (3, 4km/h, normal)<br>Tissue SO <sub>2</sub> (3, 4km/h, undersized)<br>Tissue SO <sub>2</sub> (5, 6, 7 km/h)<br>Tissue SO <sub>2</sub> (10 min recovery period) | ↑L*<br>↑L*<br>↑M,L<br>↑S<br>↑L*         |
| <b>Priego et al., 2015 [91]</b>              | Crossover      | Endurance               | 13 M, 7 F; 28.1 ± 5.4 y; 172.7 ± 9.2 cm; 67.9 ± 9.8 kg   | Recreational runners; running mileage 37.0 ± 9.4 kms/wk                        | Below-knee stockings (85% polyamide and 15% elastane (Lycra)) <sup>m</sup>                                                                                            | MR: 24 at ankle, 21 at calf                                | Running          | 40 min treadmill run (10 min warm up, 30 mins @ 80% of max aerobic speed)                                                  | VE<br>HR<br>VO <sub>2</sub> (relative, absolute)<br>CO <sub>2</sub> production<br>O <sub>2</sub> pulse<br>Perception of fatigue                                                                                                       | ↔<br>↔<br>↔<br>↔<br>↔<br>↔              |

**Table S1: During Exercise Studies**

|                                         |           |                       |                                                                 |                                                                                                       |                                                                                                                                                                    |                                                                                                            |                  |                                                                                                                                                            |                                                                                                                                                                                                                                                                                                                   |                                                    |
|-----------------------------------------|-----------|-----------------------|-----------------------------------------------------------------|-------------------------------------------------------------------------------------------------------|--------------------------------------------------------------------------------------------------------------------------------------------------------------------|------------------------------------------------------------------------------------------------------------|------------------|------------------------------------------------------------------------------------------------------------------------------------------------------------|-------------------------------------------------------------------------------------------------------------------------------------------------------------------------------------------------------------------------------------------------------------------------------------------------------------------|----------------------------------------------------|
| <b>Ravier et al., 2018 [111]</b>        | Crossover | Team sport attributes | 18 M; 23.22 ± 4.97 y; 184.61 ± 4.78 cm; 82.06 ± 9.69 kg         | Elite handball players; 11.4 ± 4.8 y handball experience, 4.3 ± 3.3 y professional playing experience | Groin-to-ankle leg sleeves (F-Like Full Leg Compressport, Geneva, Switzerland; 65% nylon, 30% elastane, 5% polyester)                                              | MR: 15 at ankle, 27 at GAS, 14 at vastus lateralis                                                         | Handball         | 3 x 12-min circuits of handball-specific exercises, incl. sprinting, jumping (4 mins rest)                                                                 | Sprint ( <i>period 3</i> )<br>CMJ ( <i>period 1, 3</i> )<br>MVC decrement<br>RFD<br>Pressure pain threshold ( <i>soleus</i> )<br>Pressure pain threshold ( <i>vastus medialis</i> )<br>Pressure pain threshold ( <i>GAS</i> )<br>Ground contact time ( <i>period 1, 3</i> )                                       | ↑S<br>↑S<br>↓L*<br>↓S<br>↓L<br>↓M<br>↓S<br>↓S      |
| <b>Rennerfelt et al., 2019 [84]</b>     | Crossover | Endurance             | 10 M, 10 F; 27 (range 22–35) y; 176 (161–192) cm; 71 (51–88) kg | Recreational runners                                                                                  | Knee-high stockings (2XU Compression Performance Run Socks, Australia; 80% nylon, 20% elastane)                                                                    | MR: 25 at ankle                                                                                            | Running          | 10km treadmill run @ 10-12 km/h (0% incline)                                                                                                               | Intramuscular pressure ( <i>baseline, running, post-run</i> )<br>Mm tissue oxygenation index ( <i>baseline, running</i> )<br>Blood pressure<br>Serum CK<br>Serum Mb ( <i>pre-post</i> )                                                                                                                           | ↑*<br>↓*<br>↔<br>↔<br>↔*                           |
| <b>Rider et al., 2014 [79]</b>          | Crossover | Endurance             | 7 M, 3 F; 19.9 ± 1 y; 167.9 ± 4.5 cm; 62.7 ± 6.5 kgs            | Collegiate cross-country runners                                                                      | Below-knee stockings (Athletic Recovery Graduated Compression Stockings, SIGVARIS Inc., Peachtree City, GA, USA; 67% dri-release polyester, 26% nylon, 7% spandex) | MR: minimum of 20 at ankle to 15 at calf                                                                   | Running          | Discontinuous ramped treadmill test (starting at 160 m/min, 0% grade; subsequent stages increased by 26.8 m/min and 1% grade; 90s walking rest b/n stages) | TTE<br>HR<br>RER<br>VO2<br>LT<br>Blood [La-] ( <i>1, 5 mins post</i> )<br>RPE                                                                                                                                                                                                                                     | ↓*<br>↔<br>↔<br>↔<br>↔<br>↓*<br>↔                  |
| <b>Rugg &amp; Sternlicht, 2013 [53]</b> | Crossover | Lower body power      | 8 M, 6 F; 28.2 ± 14.0 y; 174.7 ± 8.6 cm; 70.2 ± 14.9 kg         | Trained runners                                                                                       | Waist-to-ankle tights (C3fit graduated compression tights, Goldwin, Inc., Japan)                                                                                   | MR: 18.0 at ankle, 12.6 at calf, 7.2 at thigh                                                              | Running, jumping | 15 minutes treadmill running (5 minutes @ each of 50%, 70%, and 85% of the subject's HRR); 3 maximal CMJs (10 sec rest)                                    | CMJ ( <i>pre-post</i> )<br>RPE ( <i>post-run</i> )<br>Perceived comfort                                                                                                                                                                                                                                           | ↑*<br>↓*<br>↑*                                     |
| <b>Šambaher et al., 2016 [98]</b>       | Crossover | Jump biomechanics     | 7 M, 8 F; 23.6 ± 2.9 y; 172 ± 6.5 cm; 68.8 ± 6.7 kg             | Physically active (3-5 days/wk)                                                                       | Knee-to-ankle socks (Cramer ESS, Cramer Sports Medicine, Gardner, KS, USA; 79% nylon, 20% spandex, 1% other materials) <sup>u</sup>                                | MR: ~20–30 at ankle                                                                                        | Drop jumps       | Continuous drop jumps from a 30-cm platform at 70 Hz (by metronome) until fatigue                                                                          | Jump height<br>Time to fatigue<br>Skin temp ( <i>post warm-up, post-jumps</i> )<br>MVC force<br>Blood [La-]<br>Twitch half-relaxation time<br>EMG ( <i>tibialis anterior, soleus, GAS</i> )<br>GRF ( <i>post warm up</i> )<br>Take-off velocity<br>Contact time                                                   | ↔<br>↔<br>↑*<br>↔<br>↔<br>↓*<br>↔<br>↓*<br>↔<br>↔  |
| <b>Scanlan et al., 2008 [43]</b>        | Crossover | Endurance             | 12 M; 20.5 ± 3.6 y; 177.5 ± 4.9 cm; 70.5 ± 7.5 kgs              | Well trained, competitive cyclists; minimum training 300km/wk                                         | Waist-to-ankle tights (SportSkins Classic, Skins, Campbelltown, NSW; 76% Nylon & Meryl Microfiber, 24% Roica Spandex)                                              | 9.1 ± 2.2 at gluteus medius, 14.9 ± 2.3 at vastus lateralis, 17.3 ± 3.0 at GAS, 19.5 ± 3.4 at medial ankle | Cycling          | 60 min TT @ highest possible power output, 90 to 100 RPM                                                                                                   | Relative power output<br>Power output<br>VO <sub>2</sub> max ( <i>AnT, TT</i> )<br>VO <sub>2</sub> ( <i>AnT</i> )<br>VO <sub>2</sub> max power output<br>Cycling economy ( <i>first 15 min of TT</i> )<br>HR ( <i>AnT, max, TT</i> )<br>Peak blood [La-] ( <i>AnT, TT</i> )<br>Peak mm O <sub>2</sub> utilization | ↑S<br>↑S<br>↑S<br>↔<br>↔<br>↑S<br>↔<br>↔<br>↔<br>↔ |

**Table S1: During Exercise Studies**

|                                    |           |                     |                                                   |                                                                                                           |                                                                                                                                                                                                                                                                       |                                                                                                                                                                                                                         |                          |                                                                                                                                                 | Mm oxygenation ( <i>TT</i> )                                                                                                                                                                                                                                                                                  | ↑S                                                |
|------------------------------------|-----------|---------------------|---------------------------------------------------|-----------------------------------------------------------------------------------------------------------|-----------------------------------------------------------------------------------------------------------------------------------------------------------------------------------------------------------------------------------------------------------------------|-------------------------------------------------------------------------------------------------------------------------------------------------------------------------------------------------------------------------|--------------------------|-------------------------------------------------------------------------------------------------------------------------------------------------|---------------------------------------------------------------------------------------------------------------------------------------------------------------------------------------------------------------------------------------------------------------------------------------------------------------|---------------------------------------------------|
| <b>Sear et al., 2010 [32]</b>      | Crossover | Endurance           | 8 M; 20.6 ± 1.2 y; 72.9 ± 5.9 kg                  | Amateur team sport athletes; VO <sub>2</sub> max 57.5 ± 3.7 mL.kg <sup>-1</sup> .min <sup>-1</sup>        | Whole body: full-length bottoms and long-sleeved tops (Sport Skins Classic, Skins, Campbelltown, NSW, Australia; 76% nylon/meryl microfiber, 24% roica spandex)                                                                                                       | 5.3 ± 0.5 pectoralis major, 7.3 ± 2.5 biceps brachii, 5.8 ± 1.0 flexor carpi radialis, 5.9 ± 0.8 external obliques, 9.2 ± 1.6 gluteus maximus, 13.1 ± 1.7 vastus lateralis, 15.1 ± 2.0 GAS, 17.8 ± 2.2 medial malleolus | Running                  | 45 min intermittent treadmill running (3 repetitions of a 15-minute activity profile of 6 individual running speeds based on peak sprint speed) | Variable run speed<br>Total distance covered<br>Low-intensity activity difference<br>Fast run speed<br>Sprint speed ( <i>average, peak</i> )<br>TOI ( <i>average, post-sprint</i> )<br>VO <sub>2</sub> max<br>Blood [La-]<br>HR<br>Tissue Hb index                                                            | ↑M<br>↑M<br>↑M<br>↔<br>↔<br>↑M<br>↔<br>↔<br>↔     |
| <b>Smale et al., 2018 [40]</b>     | Crossover | Cognitive function  | 15 M; 28.1 ± 6.3 y; 76.4 ± 4.5 kg                 | Well-trained cyclists; max power output 339 ± 39 W                                                        | Waist-to-ankle tights (2XU; Elite MCS compression tight, 2XU, Victoria, Australia) as “low” condition; knee length stockings (Venosan 6000; Venosan, St. Gallen, Switzerland) as “medium” condition                                                                   | 8.6 ± 2.7 ankle, 14.9 ± 4.9 knee, 9.1 ± 3.1 thigh (“low”); 21.8 ± 6.6 ankle, 20.3 ± 6.6 knee, 15.4 ± 4.5 thigh (“medium”)                                                                                               | Cycling & cognitive task | 4 x 8 mins cycling at 30%, 50%, 70%, and 85% maximal power output (cognitive task at each increment); 4 km TT                                   | Reaction time<br>TT performance<br>Accuracy during cognitive task ( <i>“low”, 85% intensity stage</i> )<br>Middle cerebral artery blood flow velocity<br>Pressure of end-tidal CO <sub>2</sub><br>Mean arterial pressure<br>Blood [La-]<br>RPE<br>Motivation<br>Perceived difficulty                          | ↔<br>↔<br>↑M*<br>↔<br>↔<br>↔<br>↔<br>↔<br>↔       |
| <b>Sperlich et al., 2010 [77]</b>  | Crossover | Endurance           | 15 M; 27.1 ± 4.8 y; 183 ± 8 cm; 76.3 ± 7.6 kg     | Well-trained runners & triathletes; VO <sub>2</sub> max 63.7 ± 4.9 mL.kg <sup>-1</sup> .min <sup>-1</sup> | 3 conditions: socks (Craft of Scandinavia, (94% Polyamide, 6% Lycra); tights (“Elite Run Tight”, 81% Polyester, 19% Lycra), whole-body compression (“Elite Run Tight”, 81% Polyester, 19% Lycra and upper body (“Elite Run Longsleeve Top”, 81% Polyester, 19% Lycra) | NR                                                                                                                                                                                                                      | Running                  | 70% VO <sub>2</sub> max for 15 min; 2 min rest; TTE @ max speed from incremental test                                                           | VO <sub>2</sub> ( <i>submax, max</i> )<br>TTE<br>Blood [La-]<br>pH<br>O <sub>2</sub> saturation<br>Partial pressure<br>RPE<br>Mm soreness ( <i>submax</i> )<br>Mm soreness ( <i>max</i> )                                                                                                                     | ↑S<br>↑S<br>↓S<br>↔<br>↑S<br>↑S<br>↓S<br>↓L<br>↓M |
| <b>Sperlich et al., 2011 [184]</b> | Crossover | Endurance           | 15 M; 22.1 ± 1.3 y; 184.7 ± 6.8 cm; 76.0 ± 7.5 kg | Well-trained runners & triathletes; VO <sub>2</sub> max 57.2 ± 4.0 mL.kg <sup>-1</sup> .min <sup>-1</sup> | Below-knee socks (Sigvaris, Winterhur, Switzerland; 94% polyamide and 6% lycra) in four pressure conditions: “10”, “20”, “30” and “40”                                                                                                                                | 13.6 ± 2.0 at calf, 21.3 ± 2.0 at ankle (“10”); 22.8 ± 1.4 calf, 31.3 ± 4.1 ankle (“20”); 32.2 ± 2.4 calf, 38.9 ± 2.3 ankle (“30”); 38.8 ± 2.3 calf, 45.9 ± 4.0 ankle (“40”)                                            | Running                  | 45 min treadmill run @ 75% peak O <sub>2</sub> uptake                                                                                           | Cardiac output (“10”, “40”)<br>Stroke volume (“10”, “40”)<br>Cardiac index (“10”, “40”)<br>Arterio-venous O <sub>2</sub> difference (“10”, “30”)<br>Arterio-venous O <sub>2</sub> difference (“40” only)<br>O <sub>2</sub> uptake (“40” only)<br>SO <sub>2</sub> (“20” only)<br>HR<br>Blood [La-] (“40” only) | ↑S<br>↑M<br>↑S<br>↑M<br>↑S<br>↑S<br>↔<br>↑S       |
| <b>Sperlich et al., 2013 [109]</b> | Crossover | Skiing biomechanics | 12 M; 26 ± 4 y; 178 ± 4 cm; 80 ± 5 kg             | Elite alpine skiers; national/international level racing                                                  | Below-knee socks and waist-to-knee shorts (Sigvaris, Winterhur,                                                                                                                                                                                                       | 19.7 ± 3.7 at calf, 17.8 ± 1.9 at thigh                                                                                                                                                                                 | Simulated alpine skiing  | 3 min downhill tuck position w passive vibration (60 Hz and                                                                                     | CMJ height<br>Balance time<br>HR                                                                                                                                                                                                                                                                              | ↔<br>↔<br>↔                                       |



**Table S1: During Exercise Studies**

|                                         |           |                                 |                                                       |                                                                                                                                       |                                                                                                   |                                                                                                                                                                          |                                 |                                                                                                                                                          |                                                                                                                                                                                                                                                                                                                                                                |                                                                                     |
|-----------------------------------------|-----------|---------------------------------|-------------------------------------------------------|---------------------------------------------------------------------------------------------------------------------------------------|---------------------------------------------------------------------------------------------------|--------------------------------------------------------------------------------------------------------------------------------------------------------------------------|---------------------------------|----------------------------------------------------------------------------------------------------------------------------------------------------------|----------------------------------------------------------------------------------------------------------------------------------------------------------------------------------------------------------------------------------------------------------------------------------------------------------------------------------------------------------------|-------------------------------------------------------------------------------------|
|                                         |           |                                 |                                                       | experience; minimum<br>10 hrs training/wk                                                                                             | Switzerland; 94%<br>polyamide, 6% lycra)<br>in “moderate” and<br>“strong” conditions <sup>c</sup> | (“moderate”);<br>39.5 ± 3.5 at<br>calf, 34.0 ± 2.6<br>at thigh<br>(“strong”)                                                                                             |                                 | an amplitude of 6<br>mm)                                                                                                                                 | Blood [La-]<br>O <sub>2</sub> uptake<br>RER<br>VE<br>Breathing frequency<br>Tissue saturation index<br>MVC, RFD ( <i>leg extension, flexion</i> )<br>Total Hb<br>RPE (whole body, thigh, calf)<br>Knee angle in tuck position<br>Absolute & integrated acceleration<br>EMG ( <i>tibialis anterior, GAS, rectus femoris,<br/>vastus medialis</i> )              | ↔<br>↔<br>↔<br>↔<br>↔<br>↓L*<br>↔<br>↑L*<br>↓*<br>↓L*<br>↓M*<br>↑*                  |
| Sperlich et al., 2014 [44]              | Crossover | Endurance                       | 10 M; 25 ± 4 y; 180 ± 4 cm, 74.6 ± 3.2 kg             | Well-trained cross-country skiers and triathletes; minimum 5 y endurance training experience                                          | Long sleeve shirt (76% nylon, 24% spandex)                                                        | 21 ± 5 at forearm, 14 ± 3 at triceps brachii, 14 ± 2 at biceps brachii, 9 ± 2 at latissimus dorsi                                                                        | Simulating cross-country skiing | 3 x 3 mins simulated double-poling skiing sprints (w. 3 mins recovery)                                                                                   | Mean power output<br>Blood [La-] ( <i>sprint recoveries</i> )<br>Partial pressure O <sub>2</sub><br>Arterial O <sub>2</sub> saturation<br>Blood pH ( <i>sprint 2 recovery</i> )<br>oxygen uptake ( <i>sprint recovery 1, 3</i> )<br>CO <sub>2</sub> production ( <i>sprint recovery 2, 3</i> )<br>HR<br>SV<br>CO<br>Tissue saturation index<br>Total Hb<br>RPE | ↔<br>↓M*<br>↑S<br>↔<br>↑S<br>↑S<br>↓S<br>↔<br>↑S,M<br>↑S-L<br>↓M,L<br>↓↑S,M<br>↑S-L |
| Stickford et al., 2015 [29]             | Crossover | Endurance, running biomechanics | 16 M; 22.4 ± 3.0 y; 180.6 ± 4.6 cm; 66.4 ± 5.2 kg     | Collegiate or professional distance runners; 100 ± 32 kms/wk training; VO <sub>2</sub> max >65 mL.kg <sup>-1</sup> .min <sup>-1</sup> | Below-knee graduated socks (Zensah, Miami, FL)                                                    | MR: 15-20                                                                                                                                                                | Running                         | 3 x 4 min treadmill running stages (at 233, 268, and 300 m/min)                                                                                          | VO <sub>2</sub> (submaximal, maximal)<br>Ground contact time<br>Swing time<br>Step frequency<br>Step length<br>Gait variability                                                                                                                                                                                                                                | ↔<br>↔<br>↔<br>↔<br>↔<br>↔                                                          |
| Toolis & McGawley, 2020 [46]            | Crossover | Endurance                       | 4 M, 3 F; 25.1 ± 3.1 y; 176.5 ± 6.8 cm; 71.6 ± 7.9 kg | Elite national biathletes                                                                                                             | Upper and lower body garments (2XU Pty Ltd, Melbourne, Australia) <sup>e</sup>                    | 7.4 ± 2.2 at biceps brachii<br>7.9 ± 2.2 at triceps brachii,<br>13.1 ± 4.5 at brachioradialis,<br>13.3 ± 2.3 at rectus femoris<br>19.9 ± 5 at gastrocnemius lateral head | Roller-skiing                   | Simulated sprint biathlon (roller-skiing on treadmill, performance TT, 15 min for women @ 3.5° incline, 20 min for men @ 4.5° incline); TTE (~60 to 90s) | TT<br>TTE<br>HR ( <i>rest, post warm up, post TT</i> )<br>Blood [La-] ( <i>post cool down</i> )<br>Blood [La-] ( <i>rest, post TTE</i> )<br>RPE<br>Mm soreness<br>Thermal comfort<br>Thermal sensation                                                                                                                                                         | ↑S<br>↑S<br>↓M<br>↓M<br>↑S<br>↔<br>↔<br>↔<br>↔                                      |
| Treseler, Bixby & Nepocatych, 2016 [26] | Crossover | Endurance                       | 19 F; 20 ± 1 y; 163.4 ± 9.8 cm, 61.4 ± 5.3 kgs        | Physically active; minimum 90 mins run training/wk                                                                                    | Below-knee socks (McDavid Inc., Woodridge, IL, USA)                                               | MR: 18–21 at ankle, 12.6–14.7 below the knee                                                                                                                             | Running                         | 5km outdoor time trial                                                                                                                                   | TT<br>HR ( <i>final</i> )<br>RPE<br>Calf muscle pain threshold<br>Lower extremity muscle soreness<br>Comfort level                                                                                                                                                                                                                                             | ↔<br>↔<br>↑*<br>↑*<br>↓*<br>↔                                                       |
| Vaile, Stefanovic & Askew, 2016 [49]    | Crossover | Endurance                       | 10 M; 30.2 ± 7.7 y; 183 ± 1 cm; 74.0 ± 9.7 kg         | National level wheelchair rugby athletes; 13 ± 7 y since injury                                                                       | Below-knee socks (Venosan, Class II)                                                              | MR: ~21                                                                                                                                                                  | Wheelchair laps                 | 4 x 8 min quarters at 85% max lap speed (2 min rest b/n                                                                                                  | Maximal sprint time<br>Maintenance of average lap time<br>HR<br>Core body temp                                                                                                                                                                                                                                                                                 | ↔<br>↑*<br>↔<br>↔                                                                   |

**Table S1: During Exercise Studies**

|                                              |                             |                    |                                                                   |                                                                                                                                    |                                                                                                                                                                                            |                                                                                                                                                      |         |                                                                                                                                               |                                                                                                                                                                                                           |                                                                             |
|----------------------------------------------|-----------------------------|--------------------|-------------------------------------------------------------------|------------------------------------------------------------------------------------------------------------------------------------|--------------------------------------------------------------------------------------------------------------------------------------------------------------------------------------------|------------------------------------------------------------------------------------------------------------------------------------------------------|---------|-----------------------------------------------------------------------------------------------------------------------------------------------|-----------------------------------------------------------------------------------------------------------------------------------------------------------------------------------------------------------|-----------------------------------------------------------------------------|
|                                              |                             |                    |                                                                   |                                                                                                                                    |                                                                                                                                                                                            |                                                                                                                                                      |         | quarters, 5 min rest<br>@ halftime)                                                                                                           | Leg blood flow<br>Arm blood flow ( <i>post-exercise</i> )<br>RPE ( <i>end quarter 4</i> )<br>Thermal comfort                                                                                              | ↔<br>↑*<br>↑*<br>↓*                                                         |
| <b>Valle et al.,<br/>2013 [87]</b>           | Within-subject<br>crossover | Mm injury          | 15 M; 25.0<br>(19-50) y;<br>177.6 ± 3.3<br>cm; 78.2 ±<br>5.8 kgs  | Amateur soccer<br>players; 4-12 hrs<br>training/wk; VO <sub>2</sub> max<br>44.0 ± 7.6 mL.kg <sup>-1</sup> .min <sup>-1</sup>       | Waist-to-knee shorts<br>(Colibri®,<br>Puntiblonde, Spain;<br>polyamide 57%,<br>elastomer 43%; inner<br>reinforcements over<br>the quadriceps and<br>hamstrings) on one<br>leg <sup>d</sup> | NR                                                                                                                                                   | Running | 40 mins downhill<br>running @ 73% max<br>aerobic velocity<br>(-10% slope)                                                                     | Intracellular albumin infiltrates<br>Neutrophils (MPO)<br>Lymphocytes (CD3+)<br>Total muscle membrane injury                                                                                              | ↓*<br>↓*<br>↓*<br>↓*                                                        |
| <b>Varela-Sanz<br/>2011(a) [33]</b>          | Crossover                   | Running<br>economy | 13 M, 3 F;<br>33.7 ± 5.7 y;<br>169 ± 7 cm;<br>61.7 ± 7.3 kg       | Well-trained runners;<br>VO <sub>2</sub> max 60.1 ± 7.8<br>mL.kg <sup>-1</sup> .min <sup>-1</sup> ; 52.1 ±<br>13.9 kms training/wk | Below-knee graduated<br>socks (Medilast Sport,<br>Lleida, Spain; 88%<br>Polyamid, 12%<br>Elasthane)                                                                                        | MR: 15–22 at<br>ankle                                                                                                                                | Running | 4 x 6 min treadmill<br>running @ recent<br>half-marathon pace<br>(1% incline, 2 mins<br>rest b/n bouts;<br>average speed 14.8<br>± 2.2 km/hr) | HR<br>VO <sub>2</sub> max<br>%VO <sub>2</sub> max<br>Blood [La-]<br>%HR max<br>RPE                                                                                                                        | ↔<br>↔<br>↔<br>↑S<br>↓L*<br>↔                                               |
| <b>Varela-Sanz<br/>2011(b) [33]</b>          | Parallel group              | Endurance          | 10 M, 2 F;<br>34.4 ± 5.7 y;<br>1.68 ± 0.74<br>m, 60.6 ± 7.5<br>kg | Well-trained runners;<br>VO <sub>2</sub> max 62.7 ± 5.5<br>mL.kg <sup>-1</sup> .min <sup>-1</sup> ; 52.1 ±<br>13.9 kms training/wk | Below-knee graduated<br>socks (Medilast Sport,<br>Lleida, Spain; 88%<br>Polyamid, 12%<br>Elasthane)                                                                                        | MR: 15–22 at<br>ankle                                                                                                                                | Running | Treadmill TTE (1%<br>incline, speed @<br>105% of recent 10-<br>km time until<br>exhaustion; average<br>speed 17 ± 2 km/hr)                    | TTE<br>Speed<br>HR peak<br>Blood [La-]<br>VO <sub>2</sub> peak<br>%VO <sub>2</sub> max<br>%HR max<br>Running economy<br>RPE<br>Contact time<br>Flight time<br>Height<br>Power<br>Frequency<br>Step length | ↑S<br>↔<br>↓S<br>↑M<br>↓L<br>↓S<br>↓L*<br>↓L<br>↑S<br>↔<br>↔<br>↔<br>↔<br>↔ |
| <b>Vercruyssen<br/>et al., 2014<br/>[24]</b> | Crossover                   | Endurance          | 11 M; 34.7 ±<br>9.8 y; 178.4<br>± 7.0 cm;<br>72.3 ± 6.8 kg        | Trained runners; 8-12<br>hrs training/wk                                                                                           | Below-knee socks<br>(94% Polyamide and<br>6% Lycra)                                                                                                                                        | MR: 18<br>applied to the<br>calf                                                                                                                     | Running | Maximal (race<br>effort) 15.6 km trail<br>run (3 x 5.2km<br>loops, 275m<br>elevation gain per<br>loop)                                        | Run time<br>CMJ<br>HR<br>Blood [La-]<br>MVC<br>Mm O <sub>2</sub> uptake<br>Mm blood flow<br>RPE                                                                                                           | ↔<br>↔<br>↔<br>↔<br>↔<br>↔<br>↔                                             |
| <b>Wahl et al.,<br/>2012 [30]</b>            | Crossover                   | Endurance          | 9 M; 25.8 ±<br>3.8 y; 182.2<br>± 4.8 cm;<br>73.4 ± 5.3 kg         | Well-trained runners<br>& triathletes; VO <sub>2</sub><br>max 57.7 ± 4.5<br>mL.kg <sup>-1</sup> .min <sup>-1</sup>                 | Below-knee socks<br>(94% Polyamide and<br>6% Lycra) in three<br>pressure conditions:<br>“10”, “20” and “40”                                                                                | 21.1 ± 1.9<br>ankle, 13.2 ±<br>1.8 calf (“10”);<br>22.6 ± 1.2<br>ankle, 31.4 ±<br>3.9 calf (“20”);<br>39.1 ± 2.7<br>ankle, 45.8 ±<br>4.1 calf (“40”) | Running | 30 min treadmill run<br>@ 70% of peak O <sub>2</sub><br>uptake; TTE (ramp<br>test, using incline)                                             | TTE<br>Blood [La-]<br>Arterial pressure of O <sub>2</sub><br>O <sub>2</sub> uptake<br>HR<br>RBC deformability                                                                                             | ↔<br>↔<br>↔<br>↔<br>↔<br>↔                                                  |

**Table S1: During Exercise Studies**

|                                       |                          |                       |                                                       |                                                        |                                                                                                                                                                                |                            |             |                                                                                                                    |                                                                                                                                                                                         |                         |
|---------------------------------------|--------------------------|-----------------------|-------------------------------------------------------|--------------------------------------------------------|--------------------------------------------------------------------------------------------------------------------------------------------------------------------------------|----------------------------|-------------|--------------------------------------------------------------------------------------------------------------------|-----------------------------------------------------------------------------------------------------------------------------------------------------------------------------------------|-------------------------|
| <b>Willems &amp; Webb, 2010 [113]</b> | Within-subject crossover | Mm recovery           | 18 M; 20.3 ± 0.8 y; 178 ± 5 cm; 76.2 ± 5.8 kg         | Healthy university football players                    | Waist-to-ankle tights (Skins™ Sport Long Tights, Skins Compression Garments, Sydney, Australia; 76% Nylon Tactel Microfibre, 24% Elastane Creora) worn on one leg <sup>d</sup> | MR: 18 at calf, 9 at thigh | Running     | 5 x 8 mins downhill running @ 80% of VO2max, -10% gradient                                                         | Single leg vertical jump height<br>DOMS ( <i>vastus lateralis</i> , all time points)<br>DOMS ( <i>rectus femoris</i> , 24, 48 hrs post)<br>DOMS ( <i>vastus medialis</i> , 24 hrs post) | ↔<br>↔<br>↓*<br>↓*      |
| <b>Zadow et al., 2018 [20]</b>        | Parallel group           | Cardiovascular health | 43 M, 24 F; 43.4 ± 10.7 y; 170 ± 1 cm; 67.9 ± 11.2 kg | Trained runners (unspecified), registered for marathon | Foot-to-knee socks (2XU 24/7 Compression Socks, 2XU North America LLC, Carlsbad, CA, USA)                                                                                      | NR                         | Running     | Competitive marathon (42.2 km)                                                                                     | Finishing time<br>Increase in D-Dimer ( <i>post-race</i> )<br>Thrombin–anti-thrombin complex<br>Tissue factor pathway inhibitor<br>Tissue factor                                        | ↔<br>↓*<br>↔<br>↔<br>↓S |
| <b>Zaleski et al., 2019 [82]</b>      | Parallel group           | Mm damage             | 10 M, 10 F; 36.2 ± 8.2 y; 70.6 ± 13.9 kg              | Recreational athletes; 52.2 ± 10 kms training/wk       | Foot-to-knee socks (Compression Performance Run Sock, 2XU North America LLC, Carlsbad, CA, USA)                                                                                | MR: 19–25 at ankle         | Running     | Competitive marathon (42.2 km)                                                                                     | CK ( <i>immediately</i> ; 24 hrs post)<br>Hct                                                                                                                                           | ↔<br>↔                  |
| <b>Zhang et al., 2016 [186]</b>       | Crossover                | Isokinetic strength   | 12 M; 21.2 ± 1.4 y; 177.5 ± 4.8 cm; 67.1 ± 6.4 kg     | Track & field athletes                                 | Groin-to-knee shorts (polyamide, cotton, and elastodiene)                                                                                                                      | NR                         | Dynamometry | 25 consecutive maximal concentric contractions of the quadriceps and hamstrings (randomly assigned 60° and 300°/s) | Work fatigue ( <i>60°</i> )<br>EMG root mean square ( <i>60°</i> , <i>300°</i> )<br>EMG mean power frequency ( <i>rectus femoris</i> , <i>vastus lateralis</i> , <i>60°</i> )           | ↓*<br>↓*<br>↑*          |

↔ no change, ↑ increase, ↓ decrease, ↓↑ mixed change, \* significant change ( $p < 0.05$ ), *S* small effect size (Cohen's  $d$  0.20-0.50), *M* medium effect size (Cohen's  $d$  0.50-0.80), *L* large effect size (Cohen's  $d$  >0.80); *AT* aerobic threshold, *AnT* anaerobic threshold, *Blood [La-]* blood lactate, *BW* bodyweight, *CK* creatine kinase, *CMJ* countermovement jump, *DBP* diastolic blood pressure, *DOMS* delayed onset muscle soreness, *EMG* electromyography, *GAS* medial gastrocnemius, *GRF* ground reaction force, *Hct* haematocrit, *HR* heart rate, *HRR* heart rate reserve, *LDH* lactate dehydrogenase, *LT* lactate threshold, *Mb* myoglobin, *Mm* muscle, *MR* manufacturer reported, *MVC* maximal voluntary contraction, *NR* not reported, *pO<sub>2</sub>* partial pressure of oxygen, *RER* respiratory exchange ratio, *rpm* revolutions per minute (cadence); *RFD* rate of force development; *ROM* range of motion, *RPE* rating of perceived exertion, *SBP* systolic blood pressure, *SO<sub>2</sub>* oxygen saturation, *TOI* tissue oxygenation index, *TT* time trial, *TTE* time to exhaustion, *VAS* vastus lateralis & medialis, *VT* ventilatory threshold

<sup>a</sup>Researchers & participants blinded to actual pressure of stocking used; <sup>b</sup>Novel compression tights with adhesive silicone stripes on inner lining, intended to mimic sports taping; <sup>c</sup>“Control” was normal skiing race suit; <sup>d</sup>“Control” was participant’s other leg; <sup>e</sup>Novel compression garment with alternating 1-mm-wide compression ridges and compression-free areas; <sup>f</sup>Compared to control group AND classic elastic tights (80% polyester, 20% elastane); <sup>g</sup>Compared to control group AND the application of kinesiology tape (3 vertical strips over the vastus lateralis (VL), vastus medialis (VM), and rectus femoris of the dominant limb, applied by an athletic therapist); <sup>h</sup>Shorts offered ‘additional compression along primary and secondary hip adductor muscles’; <sup>i</sup>Compared to a standard compression short with isotropic stretch (HeatGear, Under Armour, USA); <sup>j</sup>Atypical garment composition and thickness (~5mm); <sup>k</sup>Compared to custom-made non-compression arm sleeves with same appearance as CG; <sup>l</sup>Stockings did not cover toes and heels; <sup>m</sup>Compared to regular socks with the same appearance as CG; <sup>n</sup>Compared to control group AND sham condition: rigid sports tape (Leuko™) over the knee extensor and ankle plantarflexor muscle groups; <sup>o</sup>Compared to control group AND placebo garment (Lycra-based long pant with Skins logo); <sup>p</sup>Unclear if long sleeve or short sleeve, with an additional X-shaped insert to “[coordinate] the extreme positions of the trunk from top to bottom”; <sup>q</sup>Contained an extra “compression thread” made of Elasthane knitted into the fabric; <sup>r</sup>Oversized CGs by at least two size designations (to a maximum of XXL); sleeves & legs were cut and re-hemmed to standardise body coverage across conditions; <sup>s</sup>Compared to commercially available sport stockings (MR: 7 mm Hg upper calf, 8 mm Hg lower calf, 8 mm Hg ankle); <sup>t</sup>Compared to an identical lower-body garment with minimal compression (4.4 ± 1.2 at thigh, 3.0 ± 1.6 at calf); <sup>u</sup>Socks did not cover toes.
